# Immuno-suppressive Virus-like particles of *Drosophila* parasitoids derive from the domestication of a behaviour-manipulating virus relative

D. Di Giovanni<sup>1</sup>, D. Lepetit<sup>1</sup>, M. Boulesteix<sup>1</sup>, M. Ravallec<sup>2</sup>, J. Varaldi<sup>1\*</sup>

<sup>1</sup> Laboratoire de Biométrie et Biologie Evolutive (UMR CNRS 5558), University Lyon 1 – University of Lyon, 43 boulevard du 11 novembre 1918, 69622 Villeurbanne cedex, France

<sup>2</sup> Unité BiVi (Biologie Intégrative et Virologie des Insectes), Université Montpellier II-INRA 1231, France

\* corresponding author : julien.varaldi at univ-lyon1.fr

## Abstract

To circumvent host immune response, numerous hymenopteran endo-parasitoid species produce virus-like structures in their reproductive apparatus that are injected into the host together with the eggs. These viral-like structures are absolutely necessary for the reproduction of these wasps. The viral evolutionary origin of these viral-like particles has been demonstrated in only two cases and for both of them, the nature of the initial virus-wasp association remains unknown either because no direct descendant infect the wasps or because the virus lineage went extinct. In this paper, we show that the virus-like particles (VLPs) produced by endoparasitoids of *Drosophila* belonging to the genus *Leptopilina* (Hymenoptera Figitidae) have a viral origin. Furthermore, the ancestral donor virus still has descendant lineage infecting one of the wasp species, thus giving us insights on the ecological interaction that possibly allowed the domestication process. Intriguingly, this contemporary virus is both vertically and horizontally transmitted and has the particularity to manipulate the behavior of the wasp. This raises the possibility that behavior manipulation has been instrumental in the birth of such association between wasps and viruses.

# 1 Introduction

Genetic information is typically passed on from generation to generation through reproduction, ie vertical transmission. However, at some point during the course of evolution, organisms may gain DNA from unrelated organisms, through horizontal gene transfer (HGT). Most horizontally acquired DNA is probably purged from the genomes of the population either because it did not reach the germinal cells in case of metazoan species and/or because no advantage is carried by the foreign sequence. However, in a number of cases, natural selection may have retained the foreign DNA leading ultimately to genetic innovation in the population/species.

The high frequency and relevance of such phenomenon has been recognized for decades for bacteria but was considered to have had a marginal impact on the evolution of metazoans. However, this view has been recently challenged due to the discovery of numerous examples of HGT in metazoans with some of them leading to genetic innovation[6]. For instance, it has been shown that some phytophagous mites and Lepidoptera deal with chemical defenses of their host plant thanks to the acquisition of a bacterial gene involved in detoxification [60]. Other very distantly related phytophagous arthropods (Aphids, mites and gall midges) independently acquired genes involved in carotenoid biosynthesis from fungal donors[41][22][13]. These carotenoid genes were previously considered as absent from animal genomes, in spite of the essential role they play on several aspects of animal biology. Based on its strong conservation in these groups, it is speculated that they have permitted genetic innovation possibly in relation to phytophagy.

Regarding the question of domestication of horizontally-transferred DNA in eukaryotes, endoparasitic wasps are of particular interest because they have repeatedly domesticated not only single genes but entire viral machineries. Endoparasitic wasps lay their eggs inside the body of other arthropods, usually other insects, ultimately killing them. Their progeny is thus exposed to the host immune system. Notably, it has been found that the ancestor of at least three monophyletic groups of endoparasitic wasps have independently domesticated a battery of viral genes allowing them to deliver either DNA encoding immuno-suppressive factors or immuno-suppressive proteins themselves[26][47]. Strikingly, in the case DNA is delivered into the host (so-called polydnviruses, PDV), it integrates into the host hemocytes DNA and gets expressed [4][12], manipulating the host physiology and behavior, ultimately favoring the development of wasp offspring. In cases where proteins are delivered, the viral machinery permits the delivery of these virulence proteins into host immune cells, thus inhibiting the host immune response[49][15]. In both cases, virally-derived genes are used by the wasp to produce a



vector toolset composed of capsids and/or envelopes. However, the virulence factors themselves (or the DNA encoding the virulence factors) are of eukaryotic origin, probably pre-dating the domestication event [12]. Evolution has thus repeatedly favored the domestication of kits of viral genes allowing the production of virus-like structures in the reproductive apparatus of parasitic wasps with clear functional convergence.

Although we may speculate that the intimacy of the association between the donor viruses and their parasitoid hosts has favored the exchanges, the biology of these ancestral viruses is mostly unknown. For one such domestication event (in the Campopleginae sub-family, Ichneumonidae family), the ancestral virus has not been identified at all, whereas a beta nudivirus has been identified as the donor virus for wasps belonging to the microgastroid complex of the Braconidae family. In the recently described case of a viral replacement in the lineage leading to *Venturia canescens* (Campopleginae sub-family), it has been shown that an alpha-nudivirus was the donor. However, close relatives of the donor viruses do not infect present-day wasps, nor infect their hosts. One possible explanation is that the "donor" viral lineages went extinct and/or have not been sampled yet. The exact nature of the association wasp/virus that permitted such massive domestication events is thus still unclear.

In this work, we identify a new independent case of virus domestication in the genus *Leptopilina* (Family Figitidae), parasitoids of *Drosophila* larvae. We provide strong evidences that the genes of viral origin permit all *Leptopilina* wasp species to produce so called virus-like particles (VLPs). VLPs have been known for decades in this genus([49]). They are produced in the venom gland of the wasp, are devoid of DNA but contain virulence proteins that are injected, together with the egg, into the *Drosophila* larva. They protect wasp eggs from *Drosophila* immune response ([49][14]). We show that a close relative of the ancestral donor virus is still segregating in the species *L. boulardi* and its biology has been extensively studied by our group[57][44][37][33][56]. The virus, known as LbFV, belongs to a possibly new dsDNA virus family related to Hytrosaviridae, and more distantly related to Nudiviridae and Baculoviridae[33]. The virus is vertically transmitted and manipulates the wasp behaviour by forcing infected females to lay their eggs into already parasitized larvae. This virus-induced "host-sharing" benefits to the virus since it allows its horizontal transmission to new parasitoid lineages. On the contrary, this "superparasitism" behaviour comes with a cost to wasp fitness, making it a nice example of behaviour manipulation[18]. This result suggests that symbionts such as LbFV, might have been instrumental in the birth of such association between wasps and viruses.

## 2 Results

We analyzed the genomic sequences of *L. boulandi*[56], *L. clavipes*[29], *L. heterotoma* (this study) and a related species in the *Ganaspis* genus (*G. xanthopoda*, this study). All *Leptopilina* species as well as *G. xanthopoda* belong to the Figitidae family and are endoparasitoids developing from various species of *Drosophila*.

The basic statistics for the assemblies used in this paper are presented in table 1. With an N50 of 2080 bp the *G. xanthopoda* assembly appeared more fragmented than those from the *Leptopilina* species whose N50 ranges from 12807 bp to 17657 bp. This reflects its two to three times larger genome size likely due to its higher content in repetitive sequences (44.92% vs. 24.02-28.82%). All four genomes were sequenced with coverage depth above 24 (between 24x and 85x), which is most likely sufficient to get the whole gene set. Accordingly, a BUSCO[51] analysis revealed that the vast majority of the 1066 single copy genes expected to be found in most arthropods are indeed present in all four assemblies (from 96.6% in *G. xanthopoda* to 99.1% in *L. boulandi*), making these assemblies suitable for HGT detection (table 1).

We inferred the relationships among the wasps under study using a set of 627 genes ubiquitous to all arthropods (see methods). As expected, the three *Leptopilina* species form a monophyletic clade with *L. heterotoma* being more closely related to *L. clavipes* than to *L. boulandi* (Fig. 1A).

We blasted the 108 proteins encoded by the behaviour-manipulating virus that infects *L. boulandi* (LbFV) against the *Leptopilina* and *Ganaspis* genomes (tblastn). Interestingly, we found that 17 viral proteins had highly significant hits in wasp genomes. Among them, two classes should be distinguished. The first class is composed of four viral genes (ORFs 11, 13, 27 and 66) that have strong homologies with both *Leptopilina* and *Ganaspis* genes. We previously reported that these genes have probably been acquired horizontally by the virus from an ancestral insect before the Figitidae diversification ([33]). Two of them (27 and 66) are predicted to encode inhibitors of apoptosis, whereas ORFs 11 and 13 encode a putative methyl-transferase. These two last genes probably derive from a single horizontal transfer followed by a subsequent gene duplication (Fig. 2A). In the following, we will focus on the second class of genes identified by this blast analysis.

### 2.1 *Leptopilina* species captured 13 viral genes

More surprisingly, we found clear evidence that a single massive integration of viral DNA into wasp genomes occurred before the diversification of the *Leptopilina* genus and after the divergence between *Ganaspis* and *Leptopilina*.

149 This event led to the integration of 13 viral proteins into the genome of the  
150 wasps (Fig. 2B). The corresponding 13 viral proteins have highly significant  
151 hits with all *Leptopilina* species, but not with *G. xanthopoda*. The percent-  
152 ages of identity between these 13 LbFV proteins and *Leptopilina* homologs  
153 ranged from 21.9 to 41.9, and e-values ranged from  $4.10^{-4}$  to  $1.310^{-178}$  (me-  
154 dian =  $10^{-33}$ , table 1). All 13 loci displayed complete open reading frame  
155 (ORF) starting with a methionine and ending with a stop codon in the three  
156 wasp species, and their length was very similar to the corresponding ORF in  
157 LbFV genome (tables 2, 3 and 4; the regression slopes of ORF length in the  
158 wasp versus ORF length in LbFV were respectively 0.95, 1.02 and 0.894 for *L.*  
159 *boulardi*, *L. heterotoma* and *L. clavipes*; all  $R^2 > 0.95$  and all p-values  $< 10^{-9}$   
160 on 11 d.f.). To define a set of expected features for typical scaffolds belong-  
161 ing to wasp genomes, we calculated the GC content and sequencing depth  
162 for scaffolds containing single-copy arthropod-universal BUSCO genes (Fig.  
163 S1). Except for one *L. clavipes* scaffold (scf7180005174277) encoding an  
164 homolog of ORF68, the general features (GC, sequencing depth) of wasp  
165 scaffolds sharing similarities with LbFV proteins were very similar to those  
166 calculated for the BUSCO-containing scaffolds (tables 2, 3, 4 and fig. S1).  
167 On the contrary, by analysis these statistics (GC and coverage), we could  
168 easily detect the presence of some known extra-chromosomal symbionts such  
169 as the virus LbFV in *L. boulardi* (Fig. S1A), or the bacteria *Wolbachia* in  
170 *L. heterotoma* (Fig. S1B). In addition, several typical intron-containing eu-  
171 karyotic genes were predicted in the vicinity of these genes (Fig. 1). Note  
172 that apart from these 13 loci specifically found in *Leptopilina* genomes, most  
173 flanking *Leptopilina* predicted proteins were also detected in the *G. xan-*  
174 *thopoda* genome (66/72 for *L. boulardi*, 8/11 for *L. heterotoma* and 10/15 for  
175 *L. clavipes*) showing that the absence of homologs in *G. xanthopoda* genome  
176 was not the consequence of a less reliable assembly. Taken together, those  
177 observations demonstrate that the *Leptopilina* scaffolds containing viral-like  
178 genes are part of the wasp genomes. The special case of scf7180005174277 in  
179 *L. clavipes* assembly may be the consequence of recent duplications for this  
180 gene, possibly explaining its higher coverage depth.

181 The evolutionary history of the thirteen genes is consistent with an hor-  
182 izontal transfer from an ancestor of the virus LbFV to *Leptopilina* species  
183 (Figure 3). Indeed, in all phylogenies, the three wasp genomes formed a  
184 monophyletic clade with LbFV as a sister group. In addition, when other  
185 sequences with homology to the proteins of interest were available in public  
186 databases, they confirmed this interpretation (ORFs 58, 78, 92, 60, 68, 85,  
187 96). Notably, it appeared from this analysis, that before being transferred  
188 from an ancestor of LbFV to *Leptopilina* wasps, ORF60 has probably been  
189 acquired from an ancestral bacteria (Figure 3).

The clustering of most of these loci on the same scaffold in *L. boulandi* (8 out of 13 on scaffold 159, N=75550 scaffolds, see Figure 1) strongly suggests that a single event is at the origin of the phenomenon. In addition, for a few pairs of *L. boulandi* and *L. heterotoma* scaffolds, it was possible to test for the synteny of their virally-derived genes (ORFs 92 and 107 in scaffolds 159 in Lb and IDBA\_7081 in Lh, and ORFs 87 and 58 in scaffolds 2503 of Lb and IDBA\_5653 in Lh). In all cases, the synteny appeared to be maintained between the two *Leptopilina* species (Fig. 1). In addition, a few flanking non-virally derived sequences were co-occurring around the same viral genes in different *Leptopilina* species (grey connections in Fig.1, see Fig. S2 for details). The overall shared organization of these genes in the three *Leptopilina* species suggests that they have been vertically inherited since a single ancestral endogenization event.

To further assess the distribution of those virally-derived genes in the diversity of *Leptopilina* wasps, we designed primers for ORF96. We successfully PCR amplified and sequenced the corresponding PCR product from DNA extracts obtained from all *Leptopilina* species tested (*L. guineaensis*, *L. freyae*, *L. victoriae* in addition to *L. boulandi*, *L. heterotoma* and *L. clavipes*, figure S3A). As expected, no PCR product was obtained from *Ganaspis xanthopoda* extracts. The phylogeny obtained after the sequencing of the PCR products was consistent with the species-tree obtained with the ITS2 sequences (Fig. S3B).

From this analysis, we conclude that an ancestor of all *Leptopilina* species acquired a set of 13 viral genes deriving from an ancestor of the behavior manipulating virus LbFV. These genes have been conserved in all *Leptopilina* species. This is very likely the consequence of a single event.

## 2.2 Virally-derived genes are under strong purifying selection in wasp genomes

In order to assess the way natural selection have acted on these virally-derived genes since their endogenization, we calculated the dN/dS ratios using alignments involving the three *Leptopilina* species. We also calculated dNdS ratios for a set of 942 genes found in the three *Leptopilina* species and that are also shared by at least 90% of all arthropods ([51]). Those genes are thus expected to be under strong purifying selection. Accordingly, the "universal" arthropod gene set had a very low dN/dS mean value (mean=0.114, median=0.085), with a distribution skewed towards 0 (Figure 4). Interestingly, the thirteen virally-derived genes had very low and very similar dNdS values (mean=0.215, median=0.222, min=0.125, max=0.284), showing that

they are all as essential for the survival and/or reproduction of *Leptopilina* wasps as any "universal" arthropod gene.

## 2.3 Virally-derived genes are only expressed in female venom glands at the onset of VLPs production

Because *Leptopilina* wasps harbor VLPs that protect their eggs from *Drosophila* immune reaction ([49], [23]), we wondered whether the 13 virally-derived genes were in fact responsible for their production. Under this hypothesis, our prediction was that the 13 genes would be expressed only in the venom gland of females since VLPs are specifically produced in this tissue, and only when VLPs are being produced. To test this idea, we measured the expression of the 13 virally-derived genes in the venom glands, ovaries, rest of the body of *L. boulardi* females, and also in *L. boulardi* males. We followed their expression from the very beginning of the pupal stage (day 11) until the emergence of the host (day 21, see fig. 5). During that period, the venom gland is being formed and is matured (Fig. 5a-e). The venom gland produces the VLPs that are released in the lumen and that finally reach the reservoir where they are stored until the emergence (Fig. 5f-i).

The patterns of expression of all 13 genes fit our prediction: they are all specifically expressed in the venom glands of females but not in other tissues, nor in males (Fig. 6). Some virally-derived genes were particularly expressed at the very beginning of venom gland morphogenesis (day 11), whereas the other genes had their peak of expression at day 14, when the reservoir of the gland starts to be filled with VLPs. Two sets of genes could also be identified based on their level of expression. One set of genes had an expression between 3 and 12 times that of the actine control gene (ORFs 94, 107, 60, 83 and 85), whereas the other genes had lower levels of expression, below 1.8 times that of the actine control (ORFs 5, 72, 68, 92, 87, 58, 78). ORF96 was even below the detection threshold in our assay. Finally, we also measured the expression of a wasp virulence protein, known as a major component of VLP proteins in *Leptopilina boulardi* (RhoGAP [30], [15], [19]). Contrary to the 13 virally-derived genes, this virulence protein has a eukaryotic origin ([25]). As expected, this gene is also specifically expressed in the venom gland, and transcription starts just after the 14-day peak observed for most virally-derived genes. Interestingly, among "early" virally-derived genes, we identified a putative DNA polymerase (ORF58, see table 5). This opened the fascinating possibility that the DNA encoding those genes is amplified during this biological process.

## 2.4 Most virally-derived genes but not the major wasp virulence factor are amplified in the venom gland

Using real-time PCR, we measured the relative DNA levels of each gene compared to an actin single copy locus. As in the transcription assay, we measured it in the venom gland, ovaries, rest of the body and in males of *L. boulardi*. We also included another single copy gene (shake) as a control. As expected the relative copy number of shake did not show any trend in time, nor differences between tissues, thus validating our assay. We observed similar "flat" patterns for ORF87, ORF58 and ORF96 although a statistically significant effect was detected at day 11 for ORFs 87 and 96. On the contrary, all other virally-derived genes were significantly amplified in the venom gland, but not in other tissues. This amplification was highly significant for most genes at day 14, where they all reached their peak of amplification. Interestingly, among the three genes that were not amplified is the putative DNA-polymerase (ORF58). This gene showed an early-transcription profile in the transcriptomic assay. The same "early-gene expression pattern" is also observed for the other non-amplified gene (ORF87). For most virally-derived genes, we observed a striking correlation between the transcription and amplification profiles (compare figs. 6 and 7). Finally, our dataset indicates that the gene encoding the major constituent of VLPs (RhoGAP) is not amplified (Fig. 7).

## 2.5 Annotation of virally-derived genes

Out of the 13 viral genes, five had similarities with known protein domains (table 5). First, the viral protein ORF58 showed clear similarity with DNA polymerase B domain (e-value  $2.310^{-20}$ ). The domain was also detected in wasp orthologs but only for the *L. clavipes* protein. For the other four proteins, similar domains were identified in both the LbFV sequence and the wasp sequences. ORF60 bears a lecithine cholesterol acyl transferase (LCAT) domain, ORF68 contains a PIF1-like helicase, ORF78 contains an RNA-polymerase domain and ORF85 contain an Ac81 domain.

## 3 Discussion

In this paper, we showed that all *Leptopilina* species contain a set of genes of viral origin deriving from an ancestor of LbFV. We describe the genomic structure of those genes in details in *L. boulardi*, *L. heterotoma* and *L. clavipes*, for which the whole genome was obtained. In addition, we were



able to detect the presence of one LbFV-derived gene (ORF96) in all *Leptopilina* DNA extracts tested so far, suggesting that those virally-derived genes are shared by all *Leptopilina* species.

So far, all studied *Leptopilina* species are known to produce VLPs in their venom gland [49][40][23]. These spherical particles are produced at the pupal stage and are stored in the reservoir of the venom gland. During an oviposition, females inject not only their egg(s) but also some VLPs into their *Drosophila* hosts. VLPs are conceptually similar to liposomes that would contain virulence proteins. VLPs then permit the wasp to address these proteins to *Drosophila* immune cells [15]. The virulence proteins delivered to the target cells then induce important morphological changes in the lamellocytes, precluding them from initiating an efficient immune reaction against the parasitoid egg [15]. Thus, the VLPs are essential for the reproduction of the wasps. Because the proteins wrapped within the VLPs have a eukaryotic origin and because neither viral transcripts nor viral proteins had been identified from venom gland analysis, it has been claimed that VLPs do not have a viral origin [48]. Other denomination as even been proposed in lieu of VLP [25]. On the contrary, we propose that VLPs found in *Leptopilina* do have a viral origin and derive from a massive endogenization event involving an ancestor of the behaviour manipulating virus LbFV (Fig 2B).

As expected from this hypothesis, we found that the virally-derived genes are specifically expressed in the venom gland, during the first part of the pupal stage, time at which the VLPs are beginning to be produced. In addition, those genes are under strong purifying selection, as could be expected for genes involved in the production of such fitness-related structures as VLPs.

Analyzing the putative biological function of the genes brings additional support in favor of this hypothesis. Although 8 out of the 13 genes had no conserved domains, three of them had functions suggesting that they could be involved in the metabolism of membrane.

The first one is ORF60 which contains a lecithine cholesterol acyl transferase (LCAT) domain. In human, LCAT is involved in extracellular metabolism of plasma lipoproteins, including cholesterol. LCAT esterifies the majority of free cholesterol, catalyzing translocation of fatty acid moiety of lecithin (phosphatidyl choline) to the free 3-OH group of cholesterol. It thus plays a major role in the maturation of HDL (high-density lipoprotein cholesterol, [50]). This putative biological property makes sense under our hypothesis since VLPs resemble liposomes that may be composed of highly hydrophobic compounds such as cholesterol. We may thus speculate that ORF60 plays a crucial role in the formation of the VLP membranes observed in the lumen of the venom gland under transmission electron microscopy. Interestingly, the phylogenetic reconstruction of this gene suggests that LbFV itself acquired



LCAT gene from a bacterial donor species.

The second gene for which annotation could be done is ORF85. ORF85 is an homolog of Ac81, a conserved protein found in all Baculoviruses. Its role has been recently deciphered in *Autographa californica* multiple nucleopolyhedrovirus (AcMNPV, [17]). During their cycle, baculoviruses first produce budded virions (BVs) and, late in infection, occlusion-derived virions (ODVs). After the initial infection, BVs are responsible for the spread of the infection from cell to cell within the infected insect. On the contrary, ODVs are only produced at the final stage of the infection. At that point nucleocapsids are retained in the nucleus where they acquire an envelope from microvesicles. They are then exported into the cytoplasm and are embedded into proteinaceous crystal matrix, thus forming occlusion bodies (OBs). The OBs are then released in the environment. OBs are absolutely necessary to initiate new insect infection through horizontal transmission. By a mutant analysis, Dong et al. [17] showed that Ac81 is necessary for the capsid envelopment and embedding within the occlusion bodies (OBs). They also showed that Ac81 contains an hydrophobic transmembrane domain that is necessary for the correct envelopment and embedding too. Interestingly, all three orthologs in *Leptopilina* sp. also contain a TM domain (Fig. S4). Our hypothesis is that the virally-derived genes found in *Leptopilina* species are responsible for the production of the VLPs, which are basically lipidic membranes. Thus we can speculate that the homolog of Ac81 in *Leptopilina* species is involved in the wrapping of proteins into the VLPs. Interestingly, it has been found that the closest viral homolog of this protein (apart from LbFV homolog) is a structural protein of the Hytrosaviridae GpSGHV. This is consistent with the idea that this protein is embedded into phospholipidic membranes.

The other genes containing a conserved domain suggest that the wasp has retained genes involved in DNA replication and transcription. The presence of a putative DNA polymerase (ORF58) and an helicase (ORF68) may sound surprising if one considers that VLPs do not contain DNA, contrary to polydnaviruses. However, we observed that after the early transcription activation of the DNA polymerase (at day 11), 10 out of the 13 virally-derived genes were subsequently amplified (at day 14). This genomic amplification correlates very well with their respective expression profile which suggests that the transcriptomic regulation of these virally-derived genes is governed, at least partly, by the gene copy number in the cell. Interestingly, the DNA polymerase itself and the nearby virally-derived gene (ORF87) are not amplified, suggesting that the amplification depends on the location of the loci in wasp chromosome. It is unclear at that point whether the genomic amplification involves the production of circular or linear amplicons or concatemers, and

where are located the boundaries of the amplified loci. On the contrary, the gene encoding the major constituent of the VLPs (RhoGAP), which does not have a viral-origin, is not genomically amplified, although it is highly transcribed from day 14 until the emergence of the wasp. This suggests that the virally-derived DNA polymerase targets some specific sequences flanking the amplified loci. The wasp genome also encodes a virally-derived RNA polymerase (ORF78) that is likely involved in the transcription of the virally-derived genes.

All together, our data show that VLP production is possible thanks to the domestication of 13 virally-derived genes, captured from an ancestor of LbFV. Based on the clustering of the genes in *L. boucardi* assembly, and on the synteny conservation, we speculate that a single event led to the acquisition of the whole gene set. We can even hypothesize that a whole virus genome integrated into the chromosome of the *Leptopilina* ancestor. Several recent publication suggest that large, possibly full-genome insertions of symbiont into their host DNA do occur in the course of evolution, including from dsDNA viruses. For instance, whole genome sequencing of the brown planthopper revealed a total of 66 putative ORFs (74,730bp in total) deriving from a nudivirus genome, including 32 out of the 33 core nudiviral genes [11]. Also, it has been recently shown that an almost complete *Wolbachia* genome has been integrated into the chromosome of its host the common pillbug *Armadillidium vulgare*, with dramatic consequences on its sex determination system[32]. After this suspected full-genome insertion of an ancestor of LbFV, we speculate that subsequent rearrangements have eliminated unnecessary genes and finally scattered, to a certain degree, the 13 remaining genes. Better genome assemblies are now necessary to gain insights on this aspect of the domestication process in the different *Leptopilina* lineages.

Our results document a novel domestication event of viruses in parasitic wasps. Indeed, from a function point of view, the domestication we document here is very similar to what has been described in the microgastroid complex in braconidae, in campopleginae, and in banchinae. In all cases, it is thought that a single endogenization event led to the integration of viral DNA into wasp chromosomes, and subsequently to the evolution of a virally-derived system delivering virulence factors to host immune cells. Despite these similarities, the underlying mechanisms are different. In the braconidae *Cotesia congregata* and *Microplitis demolitor* and in the Campopleginae *Hyposoter dydimator*, the putative virally-derived genes are genomically amplified as well as the genes encoding the virulence factors[35][9][59], although different mechanisms are involved[9]. On the contrary in *Leptopilina boucardi*, we find that only the 13 virally-derived genes are amplified, but not the virulence gene RhoGAP. The *Leptopilina* system best resembles the VLP production

observed in *Venturia canescens* in the sense that VLP do not contain DNA (contrary to the cases of the PolyDNAviruses described above) but instead proteins. However, to our knowledge the possibility that virally-derived gene and/or virulence factor genes are amplified has not been investigated in *V. canescens*.

From these examples, it is clear that the domestication of whole sets of viral genes have repeatedly occurred in endoparasitoid wasps belonging to the super-family Ichneuminoidea, with at least two events leading to polydnavirus systems (that address DNA circles encoding virulence factors to the host) in Braconidae and Ichneumonidae and one event leading to the evolution of a VLP system (that address virulence proteins wrapped into a liposome-like structure to the host) in the lineage of *V. canescens* (Ichneumonidae) [26], [47]. Actually, this last VLP domestication in *V. canescens* better corresponds to a replacement of a PDV system by a VLP system [47], showing that domestication events are frequent in this taxon. With our results, it is tempting to extend this conclusion to other distant taxons of endoparasitoids, since *Leptopilina* belongs to the family Figitidae, which diverged from Ichneumonoidea 225My ago [46].

One remaining open question for all those events, is the type of interaction the ancestral virus and its wasp did have before the domestication happened. Regarding this question, very few data are available up to now. In two probably independant cases (PDV in campopleginae such as *H. dydimator* and in banchinae such as *Glypta fumiferanae*) the ancestral virus has not been clearly identified [59][2]. On the contrary, the putative virus donors have been identified as beta-nudivirus for PDVs in braconidae [3], and as an alpha-nudivirus for VLPs found in *Venturia canescens* [47]. However, their closest viral relatives are not infecting hymenoptera, but rather other arthropods [53]. In addition, the endogenization event is ancient, at least for Bracoviruses, which is the only case for which an estimation exists (103My, [43]), rendering difficult the inferences on the type of association that existed upon emergence of the association. It is thus unclear what type of interaction did the ancestral virus have with its host before the endogenization process.

In *Leptopilina*, we unequivocally identified an ancestor of the behaviour-manipulating virus LbFV as the donor virus. First, it should be noted that in both previous cases for which the ancestor has been identified the donor virus has a large circular genome composed of a double stranded DNA. Our results again show the same pattern. Second, the previous studies repeatedly identified nudiviruses as the donor family. Here we identify a virus belonging to another, possibly new, virus family [33]. This virus is related to nudiviruses and baculoviruses, but is more closely related to the hytrosaviruses, which are known to induce Salivary Gland Hypertrophy in tsetse flies and house

flies, although it can also remain symptom-less[1].

Finally, this is the first time that the identified virus ancestor still have extant relatives infecting one of the wasp species. Furthermore, the domestication event is more recent than the bracovirus domestication in Braconidae (103Mya, [43]), since it happened after the *Ganaspis/Leptopilina* divergence, which occurred around 73Mya[8]. Although this is still a large upper bound value, using this biological system may help us infer about the nature of the initial virus/wasp association. From our previous work on the interaction between LbFV and its host *Leptopilina boulardi*, we know that LbFV is vertically transmitted and replicate in cells of the oviduct[58]. This result suggests that physical proximity with the germ line may have facilitated the initial endogenization event, thus allowing the initiation of the domestication process. The identification of a contemporary virus still infecting the wasp also opens the way for addressing experimentally the mechanisms by which the virus could integrate into wasp chromosomes. Finally, LbFV is responsible for a behavior manipulation in *L. boulardi*: it forces females to superparasitize, which allows its horizontal transmission to other wasps[55]. This raises the fascinating possibility that the ancestral virus also manipulated the behavior of the wasp. To clarify this issue, the sampling of relatives of LbFV will be essential, to be able to reconstruct the ancestral state for the lineage that actually gave rise to such genetic innovation.

## 485 4 Methods

### 486 4.1 Wasp rearing

487 *L. boulandi*, *L. heterotoma* and *G. xanthopoda* were reared on *D. melanogaster*  
488 as host (StFoy strain) in a climatic chamber (25C 60% humidity, 12/12 LD).  
489 *Drosophila* were fed with a standard medium [16].

### 490 4.2 Wasp genome sequences and annotation

491 We previously reported the genome of *Leptopilina boulandi*, strain Sienna  
492 (accession number : PQAT000000000) which has been obtained from the se-  
493 quencing of a single female[56]. Although this female was infected by LbFV,  
494 the draft genome does not contain contigs belonging to the virus genome since  
495 we removed them by comparison to the published virus genome sequence[33].  
496 The assembly was performed using IDBA\_ud [45] followed by a scaffolding  
497 step with assembled RNAseq reads using the software L.RNA.scaffolder [62].

498 We sequenced the genomes of the related *L. heterotoma* (Gotheron strain),  
499 and the more distantly related *G. xanthopoda* (Va strain). *L. heterotoma* is  
500 refractory to infection by LbFV[44] and no DNA belonging to LbFV has  
501 been found neither in *L. heterotoma* nor in *G. xanthopoda*. We extracted the  
502 DNA of a single female abdomen using Macherey-Nagel columns, similarly  
503 to what was performed for *L. boulandi*. The DNAs were then used to prepare  
504 paired-end Illumina libraries using standard protocols (TruSeq PE Cluster  
505 v3, TruSeq SBS 200 cycles v3, TruSeq Multiplex Primer). The libraries were  
506 then sequenced on a Hiseq2500 (for L.h, 2 x 100bp) or Hiseq3000 (for G.x, 2  
507 x 150bp) machine on the Genotoul sequencing platform.

508 Similarly to what was done for *L. boulandi*, the drafts of *L.heterotoma*  
509 and *G.xanthopoda* were obtained after assembling genomic DNA reads with  
510 IDBA\_ud [45]. For *L. heterotoma* assembly, this was followed by scaffolding  
511 using publicly available assembled RNAseq reads[19] by running the software  
512 L.RNA.scaffolder[62]. This RNA-seq scaffolding step was not performed for  
513 *G. xanthopoda* because no RNAseq reads were available for this species in  
514 public databases.

515 The genome of an asexual strain of *L. clavipes* (strain GBW) which is  
516 not infected by LbFV was obtained and is described in [29] (accession PR-  
517 JNA84205). To have comparable assembly strategies, we included an addi-  
518 tional RNA scaffolding step using publicly available sequences ([39]).

519 In order to test the completeness of the drafts generated, we ran the  
520 BUSCO pipeline that looks for the presence of 1066 ubiquitous genes shared  
521 by at least 90% of all arthropods ([51]). For the four genomes analysed, the

proportion of "missing genes" was  $< 3.5\%$ . The statistic was even better for the three *Leptopilina* genomes ("missing genes"  $< 1.9\%$ ), and the proportion of fragmented genes was also reduced compared to *Ganaspis xanthopoda* ( $< 1.5\%$  for *Leptopilinas* versus 18% for *Ganaspis*).

The genome sizes were estimated using several methods. First of all, we simply divided the total number of bases mapped to the draft by the mean coverage observed on scaffolds containing complete BUSCO genes. Those scaffolds are expected to contain non repeated nuclear DNA and their coverage is a valuable estimate of the coverage for any nuclear locus. Second, after filtering out adapters containing reads with Skewer version 0.2.2[28], removing reads duplicates with FastUniq version 1.1[61], filtering out reads mapping to mitochondrial contigs with Bowtie 2 version 2.3.4.1[31] and samtools version 1.8[34], removing contaminant reads (from viruses, prokaryotes and microbial eukaryotes) with Kaiju 1.6.2 used with the NR+euk 2018-02-23 database[38], k-mers frequencies were established from the remaining reads for each species using Jellyfish 2.2.9[36] and  $k = 21$  (default value). From these 21-mers distributions genome size was estimated with findGSE[52] used with default parameters. These estimates were then used to run DNAPipeTE version 1.3[21] (2 samples per run, 0.1X coverage per sample) in order to assess the repetitive fraction of the genomes. Finally, independant estimates from flow cytometry experiments were obtained for *L. boulandi*, *L. heterotoma* and *G. xanthopoda* from [20] and for *L. clavipes* from [29].

We predicted genes in wasp sequences using the software augustus 3.2.3 ([27]), with training parameters obtained from the BUSCO outputs.

## 4.3 Homology search

In order to identify homologies between viral proteins and wasp DNA, we used a simple tblastn approach with viral proteins as query and each wasp genome as database. Default parameters were used except that an evalule threshold of 0.01 was chosen.

## 4.4 Phylogenies

### 4.4.1 Species-tree

Based on 627 "universal arthropod" genes identified by the BUSCO pipeline ([51]), a species tree was constructed for *L. heterotoma*, *L. boulandi*, *L. clavipes* and *G. xanthopoda*, using *Apis mellifera* as outgroup. The protein sequences were aligned using the bioconductor msa package[5]. Individual alignments were concatenated and a phylogenetic reconstruction was then



performed using PhyML (parameters: -d aa -m LG -b -4 -v e -c 4 -a e -f m)[24]. In total, 290428 variable sites were found and the branch supports were computed using approximate likelihood ratio test (aLRT). We also constructed a tree for 10 *Leptopilina* species and *G. xanthopoda* using publicly available sequences of Internal transcribed spacer 2 (ITS2). Alignment was performed with muscle and a phylogeny was obtained with PhyML (parameters: -d nt -m GTR -b -4 -v 0.0 -c 4 -a e -f e). In total, 399 variable sites were used and the tree was rooted using mid-point rooting method.

#### 4.4.2 Gene-tree

We searched orthologs of viral proteins of interest in other organisms by blasting (blastp) them against nr (downloaded on october 2017) with an evaluate threshold of 0.01. After retrieving the sequences, we selected one sequence per species and added them to the proteins identified in *Leptopilina* genomes. The sequences were then aligned using muscle algorithm v3.8.31. Because the proteins included in the alignment diverged considerably, we selected blocks of conserved sites using the gblocks algorithm parametrized with less stringent options (allowing smaller final blocks, gaps within final blocks and less strict flanking positions, [10]). Phylogenetic reconstruction was then performed using PhyML (parameters: -d aa -m LG -b -4 -v e -c 4 -a e -f m). The branch supports were computed using approximate likelihood ratio test (aLRT). The accession numbers of the sequences used in the phylogenies are reported in table S1.

#### 4.5 PCR amplification of ORF96

Based on the sequences of *L. boulandi*, *L. heterotoma* and *L. clavipes*, we designed primers for the orthologs of LbFVORF96. The primer sequences are ATTGGTGAAATTCAATCGTC and TCATTCATTCGCAATAATTGTG. They amplified a 411bp region in a 25uL PCR reaction containing 0.2uM primers, 0.2mM dNTPs, 1mM MgCl<sub>2</sub> and 0.5U of Taq DNA polymerase with the following cycling conditions : 95 °C 30", 54 °C 30", 72 °C 60" (33 cycles).

#### 4.6 dN/dS calculation

The coding sequences of "universal arthropod" BUSCO genes identified in the three *Leptopilina* species were extracted and, using the msa and seqinr R package, were reverse-aligned using the protein alignments as a guide. dN/dS ratios were then estimated using the kaks function of the seqinr R



593 package. The method implemented in this package is noted LWL85 in [54].  
 594 A similar procedure was performed for the 13 virally-derived genes found in  
 595 the genomes of the three *Leptopilina* species.

## 596 4.7 Expression in the venom gland and other tissues

597 We studied the expression of genes during the pupal stage of *L. boulandi*, at  
 598 days 11, 14, 16, 18 and 21. 11 days corresponds to the beginning of the pupal  
 599 stage, whereas 21 days corresponds to the emergence time. Wasps were gen-  
 600 tly extirpated from the *Drosophila* puparium, and venom gland, ovaries, rest  
 601 of the body of *L. boulandi* females was dissected in a droplet of PBS + 0.01%  
 602 tween and deposited in the RLT+B-mercaptoethanol buffer of the Qiagen  
 603 RNeasy extraction kit. Males were also prepared as a control, in a similar  
 604 way. The tissues extracted from twenty individuals were then pooled together  
 605 and tissues were disrupted in a Qiagen homogenizer (3 minutes 25Hz). Two  
 606 biological replicates were performed for each condition, except for day 11  
 607 where only one sample was obtained. cDNAs were synthesized using the Su-  
 608 perscriptIII kit (ThermoFisher). Real-time PCR assays were then performed  
 609 with SYBR green (ssoadvanced universal sybr green supermix, Biorad) using  
 610 standard procedures on a Biorad CFX-96 machine. We quantified the num-  
 611 ber of copies of each target cDNA using a serial dilution standards. Because  
 612 we obtained only tiny quantities of RNA from this experiment (because of  
 613 the very small size of the tissues dissected), we were not able to test numer-  
 614 ous genes. We thus choose to use only one control gene (actine gene). As a  
 615 counterpart, we were able to test all thirteen virally-derived genes and the  
 616 RhoGAP gene. The primer sequences are given in table S2.

## 617 4.8 Genomic Amplification

618 Using a similar assay, we extracted the DNA of *L. boulandi*, at days 11, 14, 16,  
 619 18 and 21. The genomic DNA of 15 pooled individuals was extracted using  
 620 the Nucleospin tissue Macherey-Nagel kit following provider's instructions.  
 621 Three biological replicates per condition was done. Real-time PCR assays  
 622 were then performed with SYBR green using standard procedures on a Biorad  
 623 CFX-96 machine. We quantified the number of copies of each target genes  
 624 using a serial dilution standards. The primer sequences are given in table S1.  
 625 For an unknown reason, the amplification with DNA extracted from ovaries  
 626 was particularly difficult, in particular when the ovaries were mature (at day  
 627 21). We thus had to remove this tissue from the statistical analysis because  
 628 Cqs were too high to be reliable. For the same reason, most data for ovaries

at day 21 were removed from figure 7. The primer sequences are given in table S2.

## 4.9 Statistical analysis

For both the transcriptomic and genomic analysis, we calculated the absolute copy number of each gene of interest and divided it by the absolute copy number of the actine control gene. This ratio was then analyzed in an anova framework with time, tissue and time:tissue interaction as factors. The effects were tested by likelihood ratio tests (LRT) of full model versus reduced one. Contrasts between tissues were also calculated at each time point (corresponding to the star in figures 6 and 7). Residuals of the models were judged as unstructured and had an overall normal distribution.

## 4.10 Morphogenesis and electron microscopy of the venom gland

To follow the morphogenesis of the venom gland, we dissected *L. boulandi* pupae at days 11, 14, 16, 18 and 21, in a similar design used for transcriptomics. Wasps were gently extirpated from the *Drosophila* puparium, and the venom gland of females was dissected in a droplet of PBS + 0.01% tween. Venom glands were either directly mounted on a glass slide for further examination under a light microscope or transferred into a solution of 2% glutaraldehyde for further examination under the Transmission Electron Microscope (TEM). For TEM, the tissues were then dehydrated in a series of graded acetones and embedded in Epon's medium. Sections were cut on a LKB ultratome. Thin sections were double stained in uracyl acetate and lead citrate. Samples were examined with a Zeiss EM 10CR transmission microscope at 80 kV.

## 4.11 Annotation of viral genes

We searched for the presence of conserved domains in the 13 LbFV proteins horizontally transferred to *Leptopilina* species using the hmmer webserver (<https://www.ebi.ac.uk/Tools/hmmer/>).

## 5 Acknowledgment

This work was supported by a grant from the Agence Nationale de la Recherche (ANR) to JV (11-JSV7-0011 Viromics). The bio-informatic work was performed using the computing facilities of the CC LBBE/PRABI. We thank

661 the labex Ecofect for financial support for the internship of DDG. We thank  
662 Shubbah Govind for kindly providing the *Ganaspis xanthopoda* strain and  
663 Ken Kraaijeveld for providing access to raw Illumina reads of *L. clavipes*.

## 664 **6 Conflict of interest disclosure**

665 The authors of this preprint declare that they have no financial conflict of  
666 interest with the content of this article.

## 7 References

## References

- [1] A. M. M. Abd-Alla, J. M. Vlak, M. Bergoin, J. E. Maruniak, A. Parker, J. P. Burand, J. A. Jehle, D. G. Boucias, and H. S. G. of the ICTV. Hytrosaviridae: a proposal for classification and nomenclature of a new insect virus family. *Arch Virol*, 154(6):909–918, 2009.
- [2] C. Béliveau, A. Cohen, D. Stewart, G. Periquet, A. Djoumad, L. Kuhn, D. Stoltz, B. Boyle, A.-N. Volkoff, E. A. Herniou, J.-M. Drezen, and M. Cusson. Genomic and Proteomic Analyses Indicate that Banchine and Campoplegine Polydnviruses Have Similar, if Not Identical, Viral Ancestors. *J Virol*, 89(17):8909–8921, Aug. 2015.
- [3] A. Bezier, M. Annaheim, J. Herbinier, C. Wetterwald, G. Gyapay, S. Bernard-Samain, P. Wincker, I. Roditi, M. Heller, M. Belghazi, R. Pfister-Wilhem, G. Periquet, C. Dupuy, E. Huguet, A.-N. Volkoff, B. Lanzrein, and J.-M. Drezen. Polydnviruses of Braconid Wasps Derive from an Ancestral Nudivirus. *Science*, 323(5916):926–930, Feb. 2009.
- [4] K. Bitra, S. Zhang, and M. R. Strand. Transcriptomic profiling of Microplitis demolitor bracovirus reveals host, tissue and stage-specific patterns of activity. *Journal of General Virology*, 92(9):2060–2071, Aug. 2011.
- [5] U. Bodenhofer, E. Bonatesta, C. Horejš-Kainrath, and S. Hochreiter. msa: an R package for multiple sequence alignment. *Bioinformatics*, 22:btv494, Aug. 2015.
- [6] L. Boto. Horizontal gene transfer in the acquisition of novel traits by metazoans. *P R Soc B*, 281(1777):20132450, Jan. 2014.
- [7] M. L. Buffington, S. G. Brady, and S. I. Morita. Divergence estimates and early evolutionary history of Figitidae (Hymenoptera: Cynipoidea). *Systematic ...*, 2012.
- [8] M. L. Buffington, J. Nylander, and J. M. Heraty. The phylogeny and evolution of Figitidae (Hymenoptera: Cynipoidea) - Buffington - 2007 - Cladistics - Wiley Online Library. *Cladistics*, 2007.

- 699 [9] G. R. Burke, T. J. Simmonds, S. A. Thomas, and M. R. Strand. Mi-  
700 croplitis demolitor Bracovirus Proviral Loci and Clustered Replication  
701 Genes Exhibit Distinct DNA Amplification Patterns during Replication.  
702 *J Virol*, 89(18):9511–9523, Sept. 2015.
- 703 [10] J. Castresana. Selection of conserved blocks from multiple alignments  
704 for their use in phylogenetic analysis. *Mol Biol Evol*, 17(4):540–552,  
705 Apr. 2000.
- 706 [11] R.-L. Cheng, Y. Xi, Y.-H. Lou, Z. Wang, J.-Y. Xu, H.-J. Xu, and C.-  
707 X. Zhang. Brown planthopper nudivirus DNA integrated in its host  
708 genome. *J Virol*, 88(10):5310–5318, May 2014.
- 709 [12] G. Chevignon, J. Theze, S. Cambier, J. Poulain, C. Da Silva, A. Bézier,  
710 K. Musset, S. J. M. Moreau, J.-M. Drezen, and E. Huguet. Functional  
711 annotation of Cotesia congregata bracovirus: identification of viral genes  
712 expressed in parasitized host immune tissues. *J Virol*, 88(16):8795–8812,  
713 Aug. 2014.
- 714 [13] C. Cobbs, J. Heath, J. O. Stireman, and P. Abbot. Carotenoids in  
715 unexpected places: gall midges, lateral gene transfer, and carotenoid  
716 biosynthesis in animals. *Mol Phylogenet Evol*, 68(2):221–228, Aug. 2013.
- 717 [14] D. Colinet, A. Schmitz, D. Cazes, J.-L. Gatti, and M. Poirié. The  
718 origin of intraspecific variation of virulence in an eukaryotic immune  
719 suppressive parasite. *PLoS Pathog*, 6(11):e1001206, 2010.
- 720 [15] D. Colinet, A. Schmitz, D. Depoix, D. Crochard, and M. Poirié. Con-  
721 vergent Use of RhoGAP Toxins by Eukaryotic Parasites and Bacterial  
722 Pathogens. *PLoS Pathog*, 3(12):e203, 2007.
- 723 [16] J. R. David. A new medium for rearing *Drosophila* in axenic conditions.  
724 *Drosophila Info Service*, 36:128, Apr. 1962.
- 725 [17] F. Dong, J. Wang, R. Deng, and X. Wang. Autographa californica mul-  
726 tiple nucleopolyhedrovirus gene ac81 is required for nucleocapsid envel-  
727 opment . *Virus Res*, 221:47–57, Aug. 2016.
- 728 [18] S. Gandon, A. Rivero, and J. Varaldi. Superparasitism evolution: Adap-  
729 tation or manipulation? *Am Nat*, 167:E1–E22, 2006.
- 730 [19] J. Goecks, N. T. Mortimer, J. A. Mobley, G. J. Bowersock, J. Tay-  
731 lor, and T. A. Schlenke. Integrative Approach Reveals Composition of  
732 Endoparasitoid Wasp Venoms. *PLoS ONE*, 8(5):e64125, May 2013.

- 733 [20] V. E. Gokhman, J. S. Johnston, C. Small, R. Rajwani, S. J. Hanra-  
734 han, and S. Govind. Genomic and karyotypic variation in *Drosophila*  
735 parasitoids (Hymenoptera, Cynipoidea, Figitidae). *Comp Cytogenet*,  
736 5(3):211–221, Dec. 2010.
- 737 [21] C. Goubert, L. Modolo, C. Vieira, C. ValienteMoro, P. Mavingui, and  
738 M. Boulesteix. De Novo Assembly and Annotation of the Asian Tiger  
739 Mosquito (*Aedes albopictus*) Repeatome with dnaPipeTE from Raw Ge-  
740 nomic Reads and Comparative Analysis with the Yellow Fever Mosquito  
741 (*Aedes aegypti*). *Genome Biol Evol*, 7(4):1192–1205, Mar. 2015.
- 742 [22] M. Grbić, T. Van Leeuwen, R. M. Clark, S. Rombauts, P. Rouzé,  
743 V. Grbić, E. J. Osborne, W. Dermauw, P. C. T. Ngoc, F. Ortego,  
744 P. Hernández-Crespo, I. Diaz, M. Martinez, M. Navajas, É. Sucena,  
745 S. Magalhães, L. Nagy, R. M. Pace, S. Djuranović, G. Smagghe, M. Iga,  
746 O. Christiaens, J. A. Veenstra, J. Ewer, R. M. Villalobos, J. L. Hutter,  
747 S. D. Hudson, M. Velez, S. V. Yi, J. Zeng, A. Pires-daSilva, F. Roch,  
748 M. Cazaux, M. Navarro, V. Zhurov, G. Acevedo, A. Bjelica, J. A.  
749 Fawcett, E. Bonnet, C. Martens, G. Baele, L. Wissler, A. Sanchez-  
750 Rodriguez, L. Tirry, C. Blais, K. Demeestere, S. R. Henz, T. R. Gregory,  
751 J. Mathieu, L. Verdon, L. Farinelli, J. Schmutz, E. Lindquist, R. Fey-  
752 ereisen, and Y. Van de Peer. The genome of *Tetranychus urticae* reveals  
753 herbivorous pest adaptations. *Nature*, 479(7374):487–492, Nov. 2011.
- 754 [23] G. Gueguen, R. Rajwani, I. Paddibhatla, J. Morales, and S. Govind.  
755 VLPs of *Leptopilina boulardi* share biogenesis and overall stellate mor-  
756 phology with VLPs of the heterotoma clade. *Virus Res*, 160(1-2):7–7,  
757 Sept. 2011.
- 758 [24] S. Guindon, J.-F. Dufayard, V. Lefort, M. Anisimova, W. Hordijk, and  
759 O. Gascuel. New Algorithms and Methods to Estimate Maximum-  
760 Likelihood Phylogenies: Assessing the Performance of PhyML 3.0. *Syst*  
761 *Biol*, 59(3):307–321, May 2010.
- 762 [25] M. E. Heavner, J. Ramroop, G. Gueguen, G. Ramrattan, G. Do-  
763 lios, M. Scarpatti, J. Kwiat, S. Bhattacharya, R. Wang, S. Singh, and  
764 S. Govind. Novel Organelles with Elements of Bacterial and Eukary-  
765 otic Secretion Systems Weaponize Parasites of *Drosophila*. *Curr Biol*,  
766 27(18):2869–2877.e6, Sept. 2017.
- 767 [26] E. A. Herniou, E. Huguet, J. Theze, A. Bézier, G. Periquet, and J.-M.  
768 Drezen. When parasitic wasps hijacked viruses: genomic and functional

- 769 evolution of polydnaviruses. *Philosophical Transactions of the Royal*  
770 *Society B: Biological Sciences*, 368(1626):20130051, Sept. 2013.
- 771 [27] K. J. Hoff and M. Stanke. WebAUGUSTUS—a web service for training  
772 AUGUSTUS and predicting genes in eukaryotes. *Nucleic Acids Res*,  
773 41(Web Server issue):W123–8, July 2013.
- 774 [28] H. Jiang, R. Lei, S.-W. Ding, and S. Zhu. Skewer - a fast and accurate  
775 adapter trimmer for next-generation sequencing paired-end reads. *BMC*  
776 *Bioinformatics*, 15:182, 2014.
- 777 [29] K. Kraaijeveld, Y. Anvar, J. Frank, A. Schmitz, J. Bast, J. Wilbrandt,  
778 M. Petersen, T. Ziesmann, O. Niehuis, P. d. Knijff, J. T. d. Dunnen,  
779 and J. Ellers. Decay of sexual trait genes in an asexual parasitoid wasp.  
780 *Genome Biol Evol*, page evw273, Nov. 2016.
- 781 [30] C. Labrosse, P. Eslin, G. Doury, J. M. Drezen, and M. Poirié. Haemocyte  
782 changes in *D. Melanogaster* in response to long gland components of  
783 the parasitoid wasp *Leptopilina boulardi*: a Rho-GAP protein as an  
784 important factor. *J Insect Physiol*, 51(2):161–170, Feb. 2005.
- 785 [31] B. Langmead and S. L. Salzberg. Fast gapped-read alignment with  
786 Bowtie 2. *Nat Meth*, 9(4):357–359, Mar. 2012.
- 787 [32] S. Leclercq, J. Theze, M. A. Chebbi, I. Giraud, B. Moumen, L. Ernen-  
788 wein, P. Grève, C. Gilbert, and R. Cordaux. Birth of a W sex chromo-  
789 some by horizontal transfer of *Wolbachia* bacterial symbiont genome.  
790 *Proceedings of the National Academy of Sciences*, 113(52):15036–15041,  
791 Dec. 2016.
- 792 [33] D. Lepetit, B. Gillet, S. Hughes, K. Kraaijeveld, and J. Varaldi. Genome  
793 Sequencing of the Behavior Manipulating Virus LbFV Reveals a Possible  
794 New Virus Family. *Genome Biol Evol*, 8(12):3718–3739, Dec. 2016.
- 795 [34] H. Li, B. Handsaker, A. Wysoker, T. Fennell, J. Ruan, N. Homer,  
796 G. Marth, G. Abecasis, R. Durbin, and 1000 Genome Project Data Pro-  
797 cessing Subgroup. The Sequence Alignment/Map format and SAMtools.  
798 *Bioinformatics*, 25(16):2078–2079, Aug. 2009.
- 799 [35] F. Louis, A. Bézier, G. Periquet, C. Ferras, J.-M. Drezen, and C. Dupuy.  
800 The bracovirus genome of the parasitoid wasp *Cotesia congregata* is  
801 amplified within 13 replication units, including sequences not packaged  
802 in the particles. *J Virol*, 87(17):9649–9660, Sept. 2013.



- [36] G. Marçais and C. Kingsford. A fast, lock-free approach for efficient parallel counting of occurrences of k-mers. *Bioinformatics*, 27(6):764–770, Jan. 2011.
- [37] J. Martinez, F. Fleury, and J. VARALDI. Competitive outcome of multiple infections in a behavior-manipulating virus/wasp interaction. *Ecol Evol*, pages n/a–n/a, Dec. 2015.
- [38] P. Menzel, K. L. Ng, and A. Krogh. Fast and sensitive taxonomic classification for metagenomics with Kaiju. *Nature Communications*, 7:1–9, Apr. 2016.
- [39] B. Misof, S. Liu, K. Meusemann, R. S. Peters, A. Donath, C. Mayer, P. B. Frandsen, J. Ware, T. Flouri, R. G. Beutel, O. Niehuis, M. Petersen, F. Izquierdo-Carrasco, T. Wappler, J. Rust, A. J. Aberer, U. Aspöck, H. Aspöck, D. Bartel, A. Blanke, S. Berger, A. Böhm, T. R. Buckley, B. Calcott, J. Chen, F. Friedrich, M. Fukui, M. Fujita, C. Greve, P. Grobe, S. Gu, Y. Huang, L. S. Jermiin, A. Y. Kawahara, L. Krogmann, M. Kubiak, R. Lanfear, H. Letsch, Y. Li, Z. Li, J. Li, H. Lu, R. Machida, Y. Mashimo, P. Kapli, D. D. McKenna, G. Meng, Y. Nakagaki, J. L. Navarrete-Heredia, M. Ott, Y. Ou, G. Pass, L. Podsiadlowski, H. Pohl, B. M. von Reumont, K. Schütte, K. Sekiya, S. Shimizu, A. Slipinski, A. Stamatakis, W. Song, X. Su, N. U. Szucsich, M. Tan, X. Tan, M. Tang, J. Tang, G. Timelthaler, S. Tomizuka, M. Trautwein, X. Tong, T. Uchifune, M. G. Walz, B. M. Wiegmann, J. Wilbrandt, B. Wipfler, T. K. F. Wong, Q. Wu, G. Wu, Y. Xie, S. Yang, Q. Yang, D. K. Yeates, K. Yoshizawa, Q. Zhang, R. Zhang, W. Zhang, Y. Zhang, J. Zhao, C. Zhou, L. Zhou, T. Ziesmann, S. Zou, Y. Li, X. Xu, Y. Zhang, H. Yang, J. Wang, J. Wang, K. M. Kjer, and X. Zhou. Phylogenomics resolves the timing and pattern of insect evolution. *Science*, 346(6210):763–767, Nov. 2014.
- [40] J. Morales, H. Chiu, T. Oo, R. Plaza, S. Hoskins, and S. Govind. Biogenesis, structure, and immune-suppressive effects of virus-like particles of a *Drosophila* parasitoid, *Leptopilina victorae*. *J Insect Physiol*, 51(2):181–195, Feb. 2005.
- [41] N. Moran and T. Jarvik. Lateral Transfer of Genes from Fungi Underlies Carotenoid Production in Aphids. *Science*, 328(5978):624–627, Apr. 2010.

- 838 [42] L. Mouton, H. Henri, M. Boulétreau, and F. Vavre. Strain-specific reg-  
839 ulation of intracellular Wolbachia density in multiply infected insects.  
840 *Mol Ecol*, 12(12):3459–3465, Dec. 2003.
- 841 [43] N. Murphy, J. C. Banks, J. B. Whitfield, and A. D. Austin. Phylogeny  
842 of the parasitic microgastroid subfamilies (Hymenoptera: Braconidae)  
843 based on sequence data from seven genes, with an improved time esti-  
844 mate of the origin of the lineage. *Mol Phylogenet Evol*, 47(1):378–395,  
845 Apr. 2008.
- 846 [44] S. Patot, R. Allemand, F. Fleury, and J. VARALDI. An inherited virus  
847 influences the coexistence of parasitoid species through behaviour ma-  
848 nipulation. *Ecol Lett*, 15(6):603–610, Apr. 2012.
- 849 [45] Y. Peng, H. C. M. Leung, S. M. Yiu, and F. Y. L. Chin. IDBA-UD: a  
850 de novo assembler for single-cell and metagenomic sequencing data with  
851 highly uneven depth. *Bioinformatics*, 28(11):1420–1428, June 2012.
- 852 [46] R. S. Peters, L. Krogmann, C. Mayer, A. Donath, S. Gunkel, K. Meuse-  
853 mann, A. Kozlov, L. Podsiadlowski, M. Petersen, R. Lanfear, P. A.  
854 Diez, J. Heraty, K. M. Kjer, S. KLOPFSTEIN, R. Meier, C. Poli-  
855 dori, T. Schmitt, S. Liu, X. Zhou, T. Wappler, J. Rust, B. Misof, and  
856 O. Niehuis. Evolutionary History of the Hymenoptera. *Curr Biol*, pages  
857 1–7, Mar. 2017.
- 858 [47] A. Pichon, A. Bézier, S. Urbach, J. M. Aury, V. Jouan, M. Ravallec,  
859 J. Guy, F. Cousserans, J. Theze, J. Gauthier, E. Demetere, S. Schmieder,  
860 F. Wurmser, V. Sibut, M. Poirié, D. Colinet, C. da Silva, A. Couloux,  
861 V. Barbe, J. M. Drezen, and A.-N. Volkoff. Recurrent DNA virus do-  
862 mestication leading to different parasite virulence strategies. *Science*  
863 *Advances*, 1(10):e1501150–e1501150, Nov. 2015.
- 864 [48] M. Poirié, D. Colinet, and J.-L. Gatti. ScienceDirectInsights into func-  
865 tion and evolution of parasitoid wasp venoms. *Current Opinion in Insect*  
866 *Science*, 6:52–60, Dec. 2014.
- 867 [49] R. M. Rizki and T. M. Rizki. Parasitoid virus-like particles destroy  
868 *Drosophila* cellular immunity. *P Natl Acad Sci Usa*, 87(21):8388–8392,  
869 Nov. 1990.
- 870 [50] R. Saeedi, M. Li, and J. Frohlich. Clinical Biochemistry. *Clinical Bio-*  
871 *chemistry*, 48(7-8):472–475, May 2015.

- [51] F. A. Simão, R. M. Waterhouse, P. Ioannidis, E. V. Kriventseva, and E. M. Zdobnov. BUSCO: assessing genome assembly and annotation completeness with single-copy orthologs. *Bioinformatics*, 31(19):3210–3212, Oct. 2015.
- [52] H. Sun, J. Ding, M. Piednoël, and K. Schneeberger. findGSE: estimating genome size variation within human and Arabidopsis using k-mer frequencies. *Bioinformatics*, 34(4):550–557, Feb. 2018.
- [53] J. Theze, A. Bézier, G. Periquet, J.-M. Drezen, and E. A. Herniou. Paleozoic origin of insect large dsDNA viruses. *PNAS*, 108(38):15931–15935, Sept. 2011.
- [54] Y. H. Tzeng. Comparison of Three Methods for Estimating Rates of Synonymous and Nonsynonymous Nucleotide Substitutions. *Mol Biol Evol*, 21(12):2290–2298, Aug. 2004.
- [55] J. Varaldi, P. Fouillet, M. Ravallec, M. Lopez-Ferber, M. Boulétreau, and F. Fleury. Infectious Behavior in a Parasitoid. *Science*, 302(5652):1930–1930, Dec. 2003.
- [56] J. Varaldi and D. Lepetit. Deciphering the behaviour manipulation imposed by a virus on its parasitoid host: insights from a dual transcriptomic approach . *Parasitology*, 3:1–11, May 2018.
- [57] J. VARALDI, J. Martinez, S. Patot, D. Lepetit, F. Fleury, and S. Gandon. An Inherited Virus Manipulating the Behavior of its Parasitoid Host : Epidemiology and Evolutionary Consequences. In N. Beckage and J.-M. Drezen, editors, *Parasitoid Viruses: Symbionts and Pathogens*, pages 203–214. Elsevier, 2012.
- [58] J. VARALDI, M. Ravallec, C. Labrosse, M. Lopez-Ferber, M. Boulétreau, and F. Fleury. Artificial transfer and morphological description of virus particles associated with superparasitism behaviour in a parasitoid wasp. *J Insect Physiol*, 52(11-12):1202–1212, Oct. 2006.
- [59] A.-N. Volkoff, V. Jouan, S. Urbach, S. Samain, M. Bergoin, P. Wincker, E. Demetere, F. Cousserans, B. Provost, F. Coulibaly, F. Legeai, C. Béliveau, M. Cusson, G. Gyapay, and J.-M. Drezen. Analysis of virion structural components reveals vestiges of the ancestral ichnovirus genome. *PLoS Pathog*, 6(5):e1000923, May 2010.

- 906 [60] N. Wybouw, Y. Pauchet, D. G. Heckel, and T. Van Leeuwen. Horizontal  
 907 Gene Transfer Contributes to the Evolution of Arthropod Herbivory.  
 908 *Genome Biol Evol*, 8(6):1785–1801, June 2016.
- 909 [61] H. Xu, X. Luo, J. Qian, X. Pang, J. Song, G. Qian, J. Chen, and S. Chen.  
 910 FastUniq: A Fast De Novo Duplicates Removal Tool for Paired Short  
 911 Reads. *PLoS ONE*, 7(12):e52249, Dec. 2012.
- 912 [62] W. Xue, J.-T. Li, Y.-P. Zhu, G.-Y. Hou, X.-F. Kong, Y.-Y. Kuang, and  
 913 X.-W. Sun. L\_RNA\_scaffolder: scaffolding genomes with transcripts.  
 914 *BMC Genomics*, 14(1):1–1, Sept. 2013.

## 8 Tables

| basic statistics     |             |       |          |            | BUSCO stats |            |            |         |       |         | Genome size [Mb] |            |                 |
|----------------------|-------------|-------|----------|------------|-------------|------------|------------|---------|-------|---------|------------------|------------|-----------------|
| species              | n_scaffolds | N50   | coverage | Repetitive | Complete    | Duplicated | Fragmented | Missing | total | missing | BUSCO.based      | kmer.based | Cytometry.based |
| <i>L. boulandi</i>   | 127707      | 14511 | 46       | 27.65%     | 1044        | 4          | 8          | 10      | 1066  | 1%      | 353              | 347        | 361             |
| <i>L. heterotoma</i> | 231242      | 12807 | 53       | 28.82 %    | 1041        | 2          | 9          | 14      | 1066  | 1%      | 445              | 464        | 459             |
| <i>L. clavipes</i>   | 38495       | 17657 | 83       | 24.02 %    | 1025        | 7          | 15         | 19      | 1066  | 2%      | 257              | 300        | 321             |
| <i>G. xanthopoda</i> | 2777766     | 2080  | 24       | 44.92 %    | 830         | 8          | 192        | 36      | 1066  | 3%      | 829              | 977        | 968             |

Table 1: Statistics for the assemblies of wasp genomes.

| blast output |             |            |                     |            |        |      |        |        |        |          |        | corresponding ORF on scaffold |        |        |        | scaffold statistics |           |      |
|--------------|-------------|------------|---------------------|------------|--------|------|--------|--------|--------|----------|--------|-------------------------------|--------|--------|--------|---------------------|-----------|------|
| query_id     | query_len   | subject_id | identity            | aln length | qstart | qend | sstart | send   | evalue | bitscore |        | start                         | end    | length | strand | scaf_length         | cov_depth | GC   |
| 1            | LbFV_ORF5   | 696        | scaffold_159        | 34.4       | 366    | 337  | 696    | 6401   | 5337   | 5.5e-41  | 164.00 | 7601                          | 5337   | 755    | +      | 435056              | 53        | 0.36 |
| 2            | LbFV_ORF72  | 106        | scaffold_159        | 31.8       | 107    | 2    | 102    | 88433  | 88753  | 5.2e-10  | 57.40  | 88025                         | 88771  | 249    | -      | 435056              | 53        | 0.36 |
| 3            | LbFV_ORF92  | 1593       | scaffold_159        | 33.8       | 1058   | 583  | 1593   | 91842  | 94901  | 2.9e-151 | 518.00 | 89832                         | 94901  | 1690   | -      | 435056              | 53        | 0.36 |
| 4            | LbFV_ORF107 | 625        | scaffold_159        | 29.8       | 322    | 320  | 625    | 96312  | 95377  | 1.3e-11  | 71.20  | 97248                         | 95377  | 624    | +      | 435056              | 53        | 0.36 |
| 5            | LbFV_ORF94  | 182        | scaffold_159        | 29.0       | 176    | 1    | 173    | 98066  | 98557  | 5.5e-14  | 72.00  | 97829                         | 98569  | 247    | -      | 435056              | 53        | 0.36 |
| 6            | LbFV_ORF68  | 645        | scaffold_159        | 34.1       | 646    | 29   | 642    | 150985 | 152847 | 6.7e-99  | 335.00 | 150889                        | 152856 | 656    | -      | 435056              | 53        | 0.36 |
| 7            | LbFV_ORF60  | 362        | scaffold_159        | 32.6       | 377    | 5    | 353    | 187445 | 186375 | 2.4e-36  | 143.00 | 187532                        | 186366 | 389    | +      | 435056              | 53        | 0.36 |
| 8            | LbFV_ORF85  | 215        | scaffold_159        | 36.4       | 225    | 1    | 212    | 190829 | 190170 | 3.0e-26  | 108.00 | 190829                        | 190149 | 227    | +      | 435056              | 53        | 0.36 |
| 9            | LbFV_ORF87  | 176        | scaffold_2503       | 30.9       | 162    | 8    | 158    | 8659   | 8183   | 6.5e-12  | 65.90  | 8698                          | 8078   | 207    | +      | 55139               | 44        | 0.22 |
| 10           | LbFV_ORF58  | 1308       | scaffold_2503       | 36.7       | 932    | 3    | 904    | 10711  | 13299  | 1.3e-129 | 446.00 | 10909                         | 14550  | 1214   | -      | 55139               | 44        | 0.22 |
| 11           | LbFV_ORF78  | 676        | IDBA_scaffold_13958 | 40.1       | 670    | 43   | 670    | 2268   | 4205   | 1.2e-134 | 434.00 | 2487                          | 4241   | 585    | -      | 4800                | 49        | 0.57 |
| 12           | LbFV_ORF83  | 433        | scaffold_2315       | 24.8       | 435    | 14   | 407    | 874    | 2139   | 1.6e-15  | 82.40  | 862                           | 2259   | 466    | -      | 22591               | 45        | 0.20 |
| 13           | LbFV_ORF96  | 1048       | IDBA_scaffold_2184  | 41.9       | 1024   | 48   | 1041   | 3609   | 6512   | 4.0e-169 | 554.00 | 3564                          | 6545   | 994    | -      | 14197               | 45        | 0.28 |

Table 2: Blast hits for the 13 viral genes against *L. boulandi* genome.

| blast output |             |            |                     |            |        |      |        |       |        |          |        | corresponding ORF on scaffold |       |        |        | scaffold statistics |           |      |
|--------------|-------------|------------|---------------------|------------|--------|------|--------|-------|--------|----------|--------|-------------------------------|-------|--------|--------|---------------------|-----------|------|
| query_id     | query_len   | subject_id | identity            | aln length | qstart | qend | sstart | send  | evalue | bitscore |        | start                         | end   | length | strand | scaf_length         | cov_depth | GC   |
| 1            | LbFV_ORF5   | 696        | IDBA_scaffold_8257  | 29.7       | 370    | 333  | 696    | 6582  | 7661   | 3e-37    | 157.00 | 5424                          | 7661  | 746    | -      | 9987                | 59        | 0.29 |
| 2            | LbFV_ORF72  | 106        | IDBA_scaffold_32827 | 28.6       | 70     | 34   | 102    | 1541  | 1750   | 4e-04    | 36.60  | 1303                          | 1563  | 87     | -      | 2607                | 58        | 0.23 |
| 3            | LbFV_ORF92  | 1593       | IDBA_scaffold_7081  | 38.1       | 501    | 1109 | 1590   | 5437  | 3938   | 5e-94    | 347.00 | 9070                          | 3929  | 1714   | +      | 10934               | 53        | 0.29 |
| 4            | LbFV_ORF107 | 625        | IDBA_scaffold_7081  | 27.1       | 170    | 455  | 621    | 2550  | 3056   | 9e-09    | 62.40  | 1179                          | 3065  | 629    | -      | 10934               | 53        | 0.29 |
| 5            | LbFV_ORF94  | 182        | IDBA_scaffold_13988 | 27.6       | 174    | 1    | 171    | 2671  | 2186   | 1e-11    | 69.70  | 2905                          | 2168  | 246    | +      | 5494                | 53        | 0.23 |
| 6            | LbFV_ORF68  | 645        | IDBA_scaffold_6001  | 32.6       | 660    | 29   | 644    | 7459  | 5555   | 3e-92    | 339.00 | 7561                          | 5552  | 670    | +      | 11133               | 52        | 0.48 |
| 7            | LbFV_ORF60  | 362        | scaffold_1324       | 26.0       | 381    | 5    | 353    | 4186  | 3065   | 7e-30    | 131.00 | 4270                          | 3056  | 405    | +      | 11549               | 50        | 0.34 |
| 8            | LbFV_ORF85  | 215        | scaffold_1324       | 35.2       | 219    | 1    | 207    | 375   | 1031   | 1e-23    | 109.00 | 375                           | 1052  | 226    | -      | 11549               | 50        | 0.34 |
| 9            | LbFV_ORF87  | 176        | IDBA_scaffold_5653  | 29.0       | 162    | 8    | 162    | 5879  | 6355   | 1e-05    | 49.70  | 5834                          | 6457  | 208    | -      | 11655               | 53        | 0.32 |
| 10           | LbFV_ORF58  | 1308       | IDBA_scaffold_5653  | 31.5       | 1378   | 19   | 1299   | 5204  | 1260   | 8e-158   | 558.00 | 5126                          | 1170  | 1319   | +      | 11655               | 53        | 0.32 |
| 11           | LbFV_ORF78  | 676        | IDBA_scaffold_9791  | 41.0       | 646    | 70   | 669    | 3914  | 2034   | 2e-123   | 443.00 | 3692                          | 1992  | 567    | +      | 9362                | 52        | 0.21 |
| 12           | LbFV_ORF83  | 433        | IDBA_scaffold_9791  | 21.9       | 429    | 14   | 407    | 7018  | 8277   | 8e-15    | 82.00  | 7006                          | 8385  | 460    | -      | 9362                | 52        | 0.21 |
| 13           | LbFV_ORF96  | 1048       | IDBA_scaffold_1712  | 36.6       | 1043   | 48   | 1041   | 16775 | 13806  | 2e-164   | 580.00 | 16820                         | 13773 | 1016   | +      | 26871               | 53        | 0.29 |

Table 3: Blast hits for the 13 viral genes against *L. heterotoma* genome.

| blast output |             |            |                  |            |        |      |        |       |        |          | corresponding ORF on scaffold |       |        |        | scaffold statistics |           |     |      |
|--------------|-------------|------------|------------------|------------|--------|------|--------|-------|--------|----------|-------------------------------|-------|--------|--------|---------------------|-----------|-----|------|
| query_id     | query_len   | subject_id | identity         | aln length | qstart | qend | sstart | send  | evalue | bitscore | start                         | end   | length | strand | scaf_length         | cov_depth | GC  |      |
| 1            | LbFV_ORF5   | 696        | scf7180005159507 | 33.1       | 366    | 337  | 696    | 1730  | 663    | 1.9e-40  | 162.00                        | 2906  | 663    | 748    | +                   | 5318      | 87  | 0.31 |
| 2            | LbFV_ORF72  | 106        | scf7180005166731 | 32.7       | 107    | 2    | 102    | 6537  | 6217   | 8.8e-09  | 53.90                         | 6945  | 6199   | 249    | +                   | 8832      | 81  | 0.30 |
| 3            | LbFV_ORF92  | 1593       | scaffold_1017    | 33.7       | 998    | 579  | 1536   | 21309 | 18403  | 3.1e-136 | 472.00                        | 23376 | 18370  | 1669   | +                   | 23961     | 75  | 0.27 |
| 4            | LbFV_ORF107 | 625        | scf7180005156365 | 28.3       | 378    | 265  | 622    | 1897  | 809    | 5.3e-10  | 65.50                         | 2674  | 803    | 624    | +                   | 5122      | 96  | 0.30 |
| 5            | LbFV_ORF94  | 182        | scf7180005161552 | 27.0       | 174    | 1    | 171    | 2763  | 2278   | 1.2e-12  | 67.80                         | 3015  | 2260   | 252    | +                   | 4524      | 62  | 0.28 |
| 6            | LbFV_ORF68  | 645        | scf7180005174277 | 34.0       | 674    | 29   | 644    | 5118  | 7034   | 3.5e-103 | 347.00                        | 5016  | 7037   | 674    | -                   | 7741      | 213 | 0.30 |
| 7            | LbFV_ORF60  | 362        | scf7180005174113 | 31.8       | 384    | 5    | 353    | 2297  | 3421   | 1.4e-33  | 134.00                        | 2213  | 3430   | 406    | -                   | 6683      | 57  | 0.29 |
| 8            | LbFV_ORF85  | 215        | scf7180005171671 | 33.0       | 218    | 1    | 207    | 3017  | 3670   | 1.3e-23  | 100.00                        | 3017  | 3691   | 225    | -                   | 4425      | 83  | 0.29 |
| 9            | LbFV_ORF87  | 176        | scaffold_S86     | 31.5       | 165    | 8    | 158    | 8088  | 8570   | 3.6e-11  | 63.20                         | 8049  | 8678   | 210    | -                   | 19330     | 85  | 0.28 |
| 10           | LbFV_ORF58  | 1308       | scf7180005154334 | 31.5       | 1042   | 317  | 1288   | 16626 | 13723  | 1.8e-120 | 418.00                        | 16746 | 13633  | 1038   | +                   | 16768     | 70  | 0.26 |
| 11           | LbFV_ORF78  | 676        | scf7180005177077 | 41.0       | 675    | 39   | 669    | 11274 | 13268  | 3.7e-135 | 441.00                        | 11517 | 13316  | 600    | -                   | 21465     | 86  | 0.29 |
| 12           | LbFV_ORF83  | 433        | scf7180005174071 | 24.5       | 436    | 9    | 404    | 3734  | 5005   | 1.8e-20  | 97.40                         | 3740  | 5122   | 461    | -                   | 13231     | 85  | 0.28 |
| 13           | LbFV_ORF96  | 1048       | scf7180005173345 | 40.4       | 1013   | 48   | 1021   | 9667  | 6782   | 1.3e-178 | 582.00                        | 9712  | 6686   | 1009   | +                   | 24926     | 74  | 0.28 |

Table 4: Blast hits for the 13 viral genes against *L. clavipes* genome.

| locus | species       | alignment_start | alignment_end | envelope_start | envelope_end | accession  | family name        | hmm_start | hmm_end | hmm_length | bit_score | Individual.E.value | Conditional.E.value |
|-------|---------------|-----------------|---------------|----------------|--------------|------------|--------------------|-----------|---------|------------|-----------|--------------------|---------------------|
| ORF58 | LbFV          | 639             | 870           | 599            | 880          | PF00136.20 | DNA_pol.B          | 40        | 200     | 464        | 72.63     | 2.3e-20            | 1.4e-24             |
| ORF58 | L. clavipes   | 349             | 578           | 322            | 591          | PF00136.20 | DNA_pol.B          | 19        | 205     | 464        | 23.88     | 1.4e-05            | 1.7e-09             |
| ORF60 | LbFV          | 76              | 172           | 57             | 351          | PF02450.14 | LCAT               | 66        | 165     | 392        | 30.75     | 1.6e-07            | 6.7e-11             |
| ORF60 | L. bouardi    | 121             | 218           | 105            | 234          | PF02450.14 | LCAT               | 76        | 172     | 392        | 25.45     | 6.6e-06            | 3.5e-09             |
| ORF60 | L. heterotoma | 120             | 218           | 103            | 284          | PF02450.14 | LCAT               | 76        | 173     | 392        | 27.26     | 1.8e-06            | 9.9e-10             |
| ORF60 | L. clavipes   | 120             | 367           | 103            | 398          | PF02450.14 | LCAT               | 76        | 280     | 392        | 25.24     | 7.6e-06            | 4.1e-09             |
| ORF68 | LbFV          | 124             | 167           | 122            | 174          | PF05970.13 | PIF1-like helicase | 3         | 46      | 364        | 21.87     | 8.0e-05            | 3.3e-08             |
| ORF68 | LbFV          | 248             | 320           | 226            | 379          | PF05970.13 | PIF1-like helicase | 103       | 171     | 364        | 15.24     | 8.3e-03            | 3.5e-06             |
| ORF68 | L. bouardi    | 138             | 181           | 138            | 191          | PF05970.13 | PIF1-like helicase | 1         | 44      | 364        | 11.92     | 8.4e-02            | 7.6e-05             |
| ORF68 | L. bouardi    | 273             | 344           | 261            | 388          | PF05970.13 | PIF1-like helicase | 104       | 175     | 364        | 11.54     | 1.1e-01            | 9.8e-05             |
| ORF68 | L. heterotoma | 139             | 182           | 139            | 193          | PF05970.13 | PIF1-like helicase | 1         | 44      | 364        | 11.49     | 1.1e-01            | 8.9e-05             |
| ORF68 | L. heterotoma | 283             | 353           | 260            | 396          | PF05970.13 | PIF1-like helicase | 104       | 174     | 364        | 16.27     | 4.0e-03            | 3.1e-06             |
| ORF68 | L. clavipes   | 142             | 183           | 141            | 193          | PF05970.13 | PIF1-like helicase | 2         | 43      | 364        | 8.51      | 9.2e-01            | 8.8e-04             |
| ORF68 | L. clavipes   | 284             | 339           | 265            | 358          | PF05970.13 | PIF1-like helicase | 103       | 158     | 364        | 12.71     | 4.8e-02            | 4.6e-05             |
| ORF78 | LbFV          | 358             | 415           | 244            | 422          | PF00623.19 | RNA_pol.Rpb1.2     | 100       | 156     | 166        | 16.14     | 9.1e-03            | 5.4e-07             |
| ORF78 | L. bouardi    | 238             | 299           | 232            | 303          | PF00623.19 | RNA_pol.Rpb1.2     | 100       | 160     | 166        | 15.16     | 1.8e-02            | 1.1e-06             |
| ORF78 | L. heterotoma | 206             | 273           | 149            | 277          | PF00623.19 | RNA_pol.Rpb1.2     | 95        | 161     | 166        | 18.21     | 2.1e-03            | 1.2e-07             |
| ORF78 | L. clavipes   | 236             | 305           | 202            | 309          | PF00623.19 | RNA_pol.Rpb1.2     | 93        | 161     | 166        | 19.14     | 1.1e-03            | 1.3e-07             |
| ORF85 | LbFV          | 56              | 201           | 5              | 201          | PF05820.10 | Ac81               | 28        | 181     | 181        | 77.15     | 1.1e-21            | 1.3e-25             |
| ORF85 | L. bouardi    | 62              | 214           | 41             | 214          | PF05820.10 | Ac81               | 26        | 181     | 181        | 74.16     | 9.0e-21            | 1.1e-24             |
| ORF85 | L. heterotoma | 63              | 213           | 34             | 213          | PF05820.10 | Ac81               | 29        | 181     | 181        | 78.91     | 3.1e-22            | 3.7e-26             |
| ORF85 | L. clavipes   | 59              | 212           | 34             | 212          | PF05820.10 | Ac81               | 25        | 181     | 181        | 73.61     | 1.3e-20            | 7.9e-25             |

Table 5: hmmer sequence analysis for the 13 proteins encoded by LbFV and their orthologs in *Leptopilina* wasps. Only hits with individual evalues < 0.15 are shown.

## 916 **9 Figures**



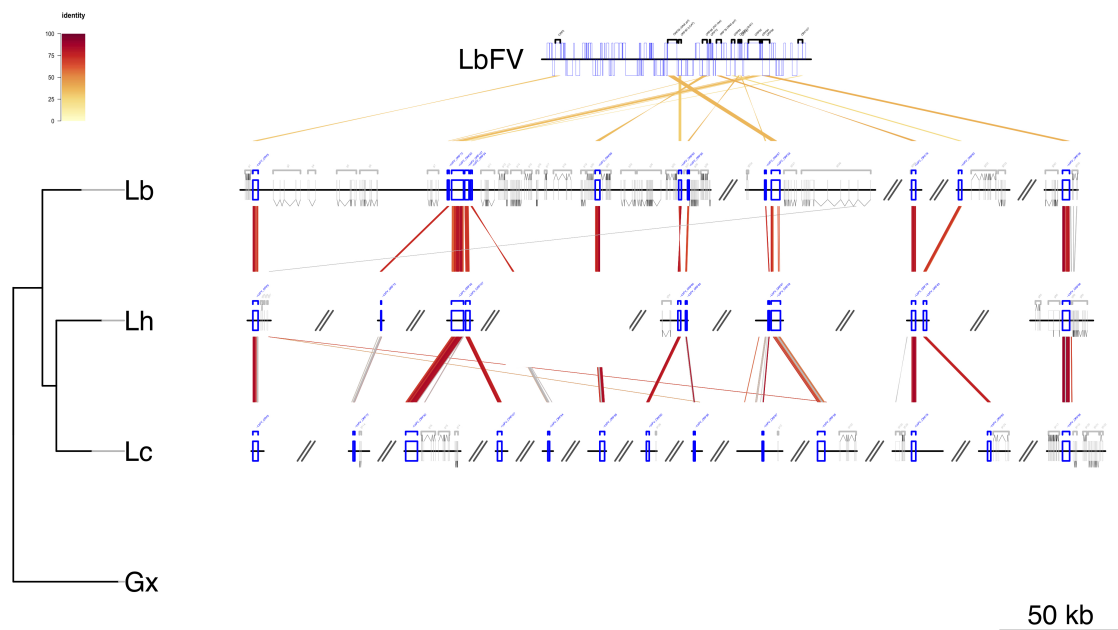

Figure 1: Comparative genomics of wasp scaffolds sharing similarities with virus proteins. Lb: *L. boulandi*, Lh: *L. heterotoma*, Lc: *L. clavipes*, Gx: *Ganaspis xanthopoda*, LbFV: Leptopilina boulandi Filamentous Virus. (A) The species-tree on the left has been obtained using a concatenation of 627 universal arthropod genes. All branches (Lh-Lc and Lh-Lc/Lb) have an aLRT value of 1 (*Apis mellifera* was used as an outgroup). The colour code depicts the percentage of identity between amino-acid sequence pairs. The figure has been drawn using the genoPlotR package

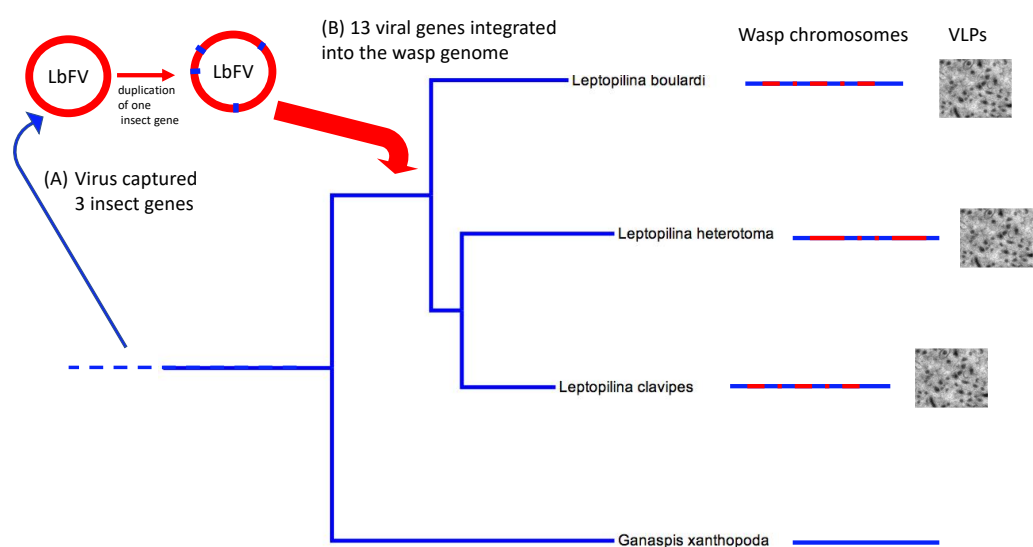

Figure 2: Hypothetical scenario for genetic exchanges between the wasps and the virus LbFV. (A) Before the diversification of Figitidae, LbFV captured 3 insect genes. One of them was subsequently duplicated. (B) After the divergence between *Ganaspis* and *Leptopilina* (around 74My ago[7]), but before the diversification of *Leptopilina* genus, possibly a whole genome of LbFV integrated wasp chromosomes. Nowadays, all *Leptopilina* species bear 13 LbFV-derived genes that allow them to produce VLPs.

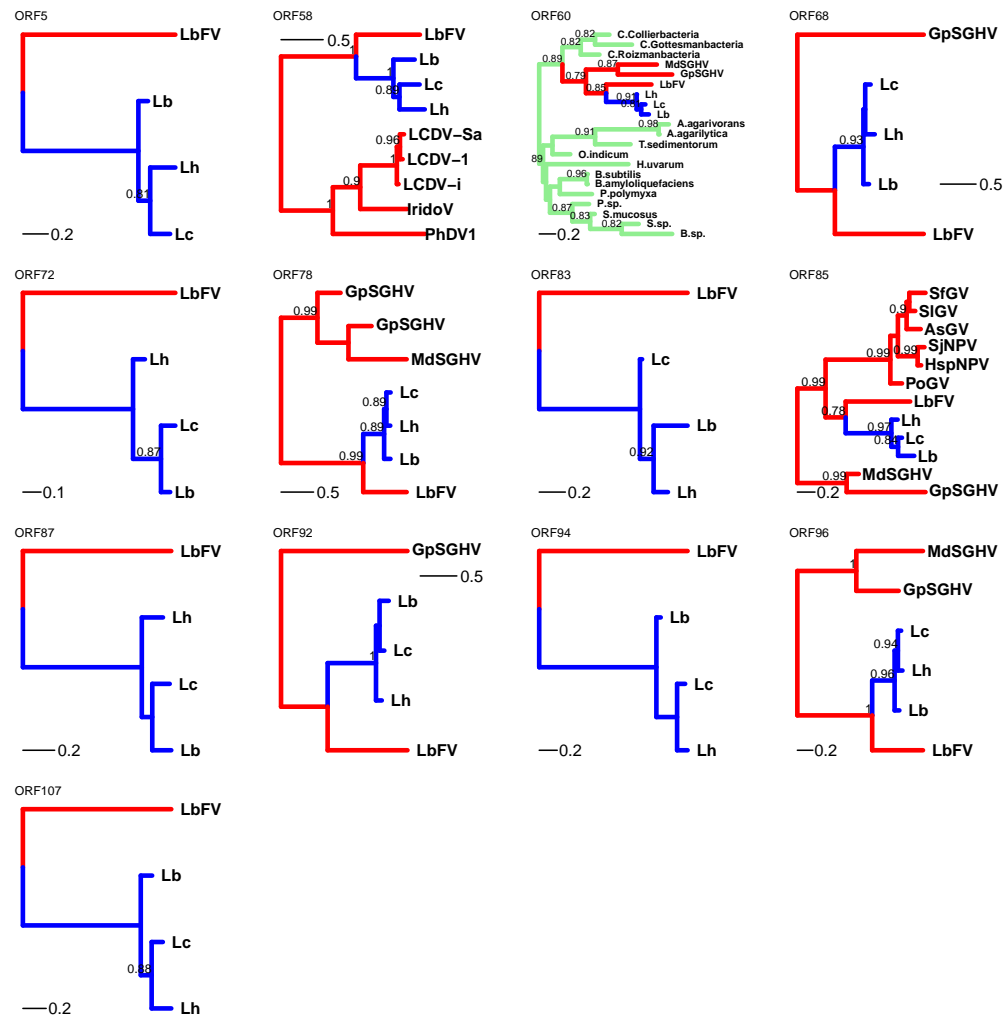

Figure 3: Phylogenetic evidence for a massive horizontal transfer of thirteen viral genes into the genome of *Leptopilina* wasps. The names of the ORFs refers to the ORF number in LbFV genome. Blue, red and green colors represent respectively (supposedly) eukaryotic, viral or bacterial branches. Only aLRT supports > 0.7 are shown.

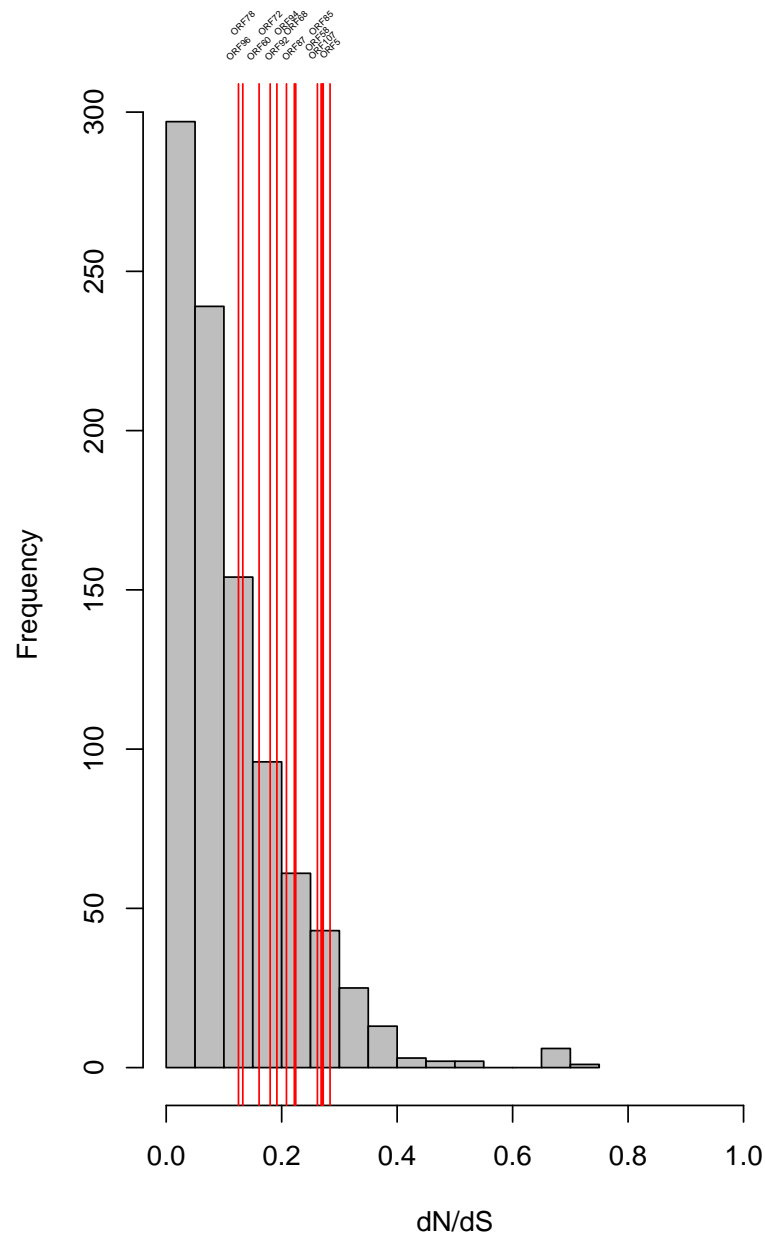

Figure 4: dN/dS ratio for a set of 942 universal arthropod genes and for the 13 virally derived genes found in *Leptopilina* species (indicated by the red lines).

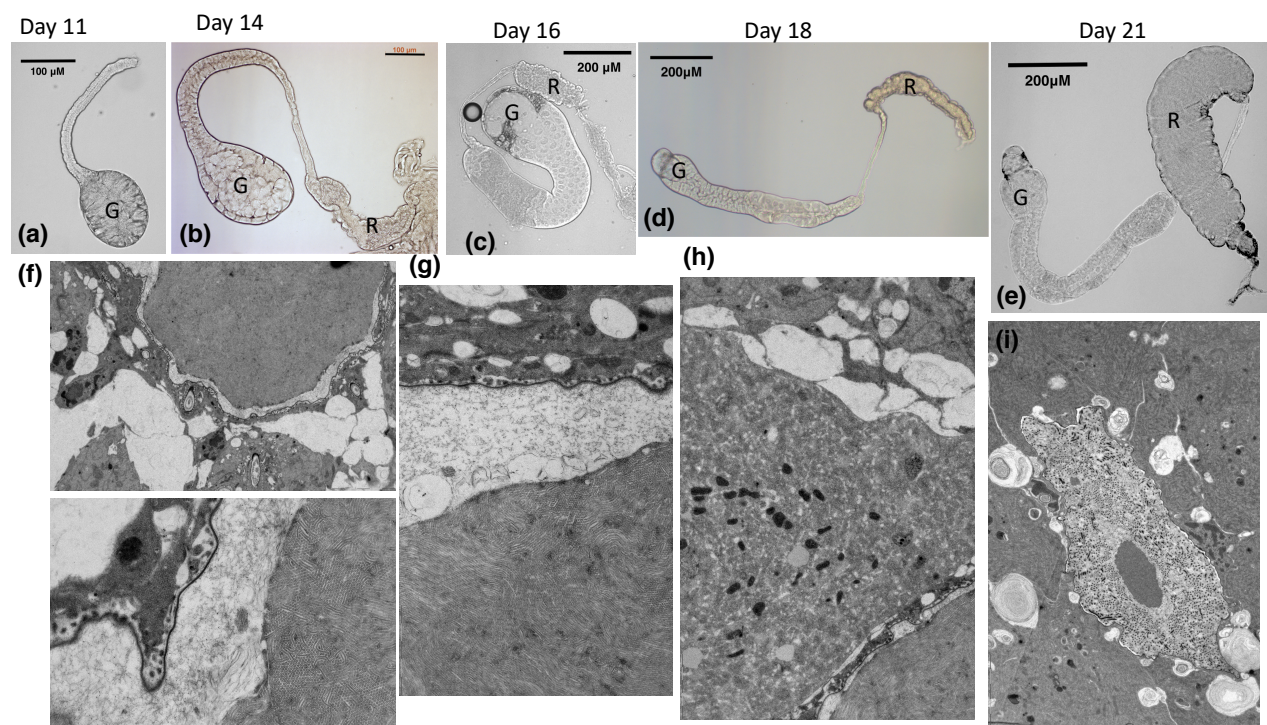

Figure 5: Morphogenesis of the venom gland and of the VLPs during pupal stage of *L. boulandi* females. G: venom gland; R: reservoir of the venom gland. Overall structure of the organ under light microscope at day 11 (a), 14 (b), 16 (c), 18(d) and 21(e). Electron microscopy of the venom gland at day 14 (f), 16 (g) , 18 (h) and 21 (i). At that temperature (25°C), 11 days corresponds to the beginning of the pupation in *L. boulandi*, whereas females are emerging at 21 days.

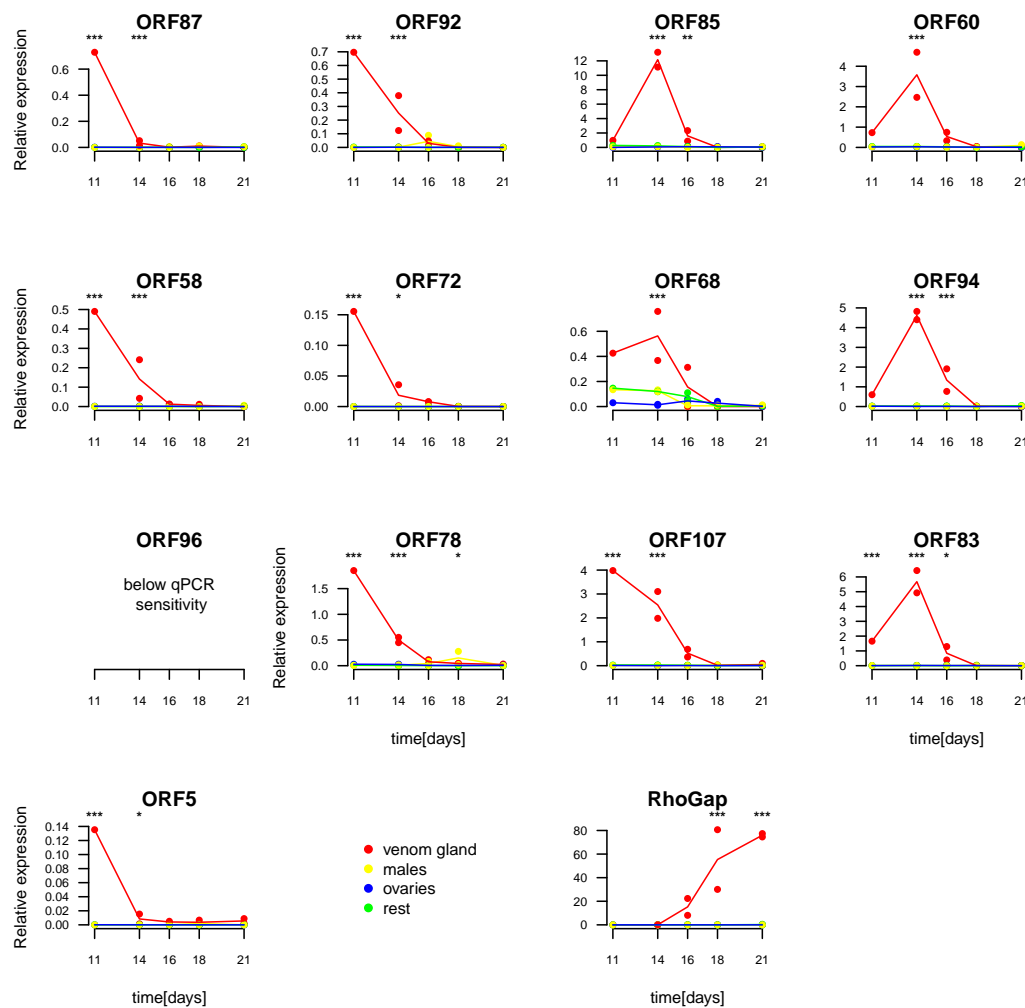

Figure 6: Expression of the 13 virally-derived genes and of the Rho-Gap in different tissues of *L. boulandi* from initial pupal stage to adult. x-axis represents days since egg-laying. 11 days corresponds to the beginning of the pupal stage and 21 days to the emergence of adults from the *Drosophila* puparium.

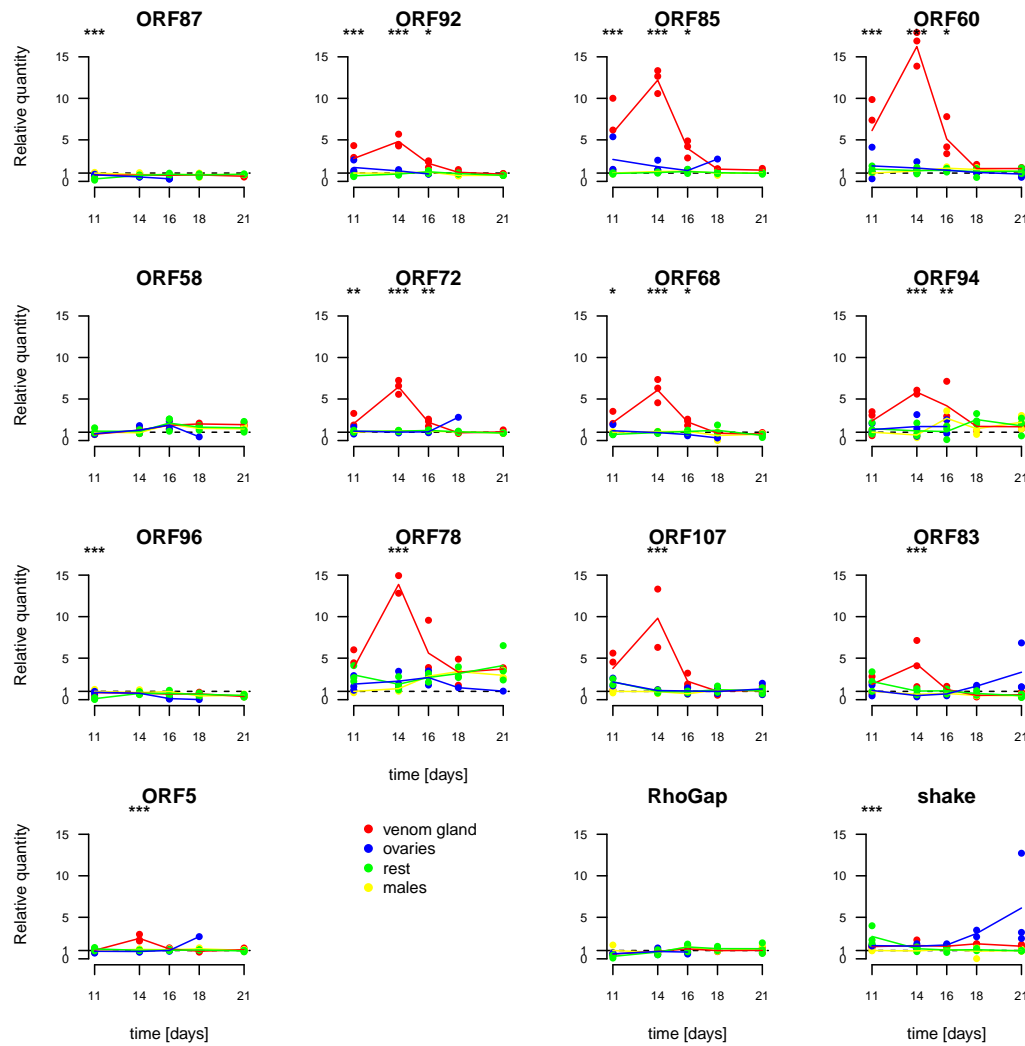

Figure 7: Genomic amplification of virally derived-genes measured by real time PCR. The relative quantity of each target gene is represented relative to the actine control gene and normalized by the ratio observed in males at day 11. The expected value under no amplification (relative quantity=1) is indicated as a dotted line. Stars correspond to the tissue effect tested at each time point (with holm correction for multiple tests) : \* < 0.05, \*\* < 0.01, \*\*\* < 0.001.



## 917 10 Supplementary tables and figures

|     | Locus  | species                                              | GI                | Figure |
|-----|--------|------------------------------------------------------|-------------------|--------|
| 1   | ORF5   | Lb                                                   | _PQAT000000000    | 3      |
| 2   | ORF5   | Lh                                                   | pending acc. num. | 3      |
| 3   | ORF5   | Lc                                                   | JUFY01000000      | 3      |
| 4   | ORF5   | LbFV                                                 | 1148998810        | 3      |
| 5   | ORF58  | Lb                                                   | _PQAT000000000    | 3      |
| 6   | ORF58  | Lh                                                   | pending acc. num. | 3      |
| 7   | ORF58  | Lc                                                   | JUFY01000000      | 3      |
| 8   | ORF58  | LbFV                                                 | 1148998708        | 3      |
| 9   | ORF60  | Lb                                                   | _PQAT000000000    | 3      |
| 10  | ORF60  | Lh                                                   | pending acc. num. | 3      |
| 11  | ORF60  | Lc                                                   | JUFY01000000      | 3      |
| 12  | ORF60  | Lymphocystis_disease_virus--isolate_China            | 51870153          | 3      |
| 13  | ORF60  | Organic_Lake_phycodnavirus_1                         | 322510829         | 3      |
| 14  | ORF60  | Invertebrate_iridovirus_25                           | 589287870         | 3      |
| 15  | ORF60  | Lymphocystis_disease_virus_1                         | 611962711         | 3      |
| 16  | ORF60  | Lymphocystis_disease_virus_Sa                        | 1135106808        | 3      |
| 17  | ORF60  | LbFV                                                 | 1148998761        | 3      |
| 18  | ORF68  | Acyrthosiphon_pisum                                  | 328698707         | 3      |
| 19  | ORF68  | Adoxophyes_honmai_entomopoxvirus_L                   | 506498063         | 3      |
| 20  | ORF68  | Apis_cerana_cerana                                   | 1241837182        | 3      |
| 21  | ORF68  | Apis_dorsata                                         | 572314547         | 3      |
| 22  | ORF68  | Apis_florea                                          | 820863019         | 3      |
| 23  | ORF68  | Apis_mellifera                                       | 571506210         | 3      |
| 24  | ORF68  | Bombus_terrestris                                    | 340708910         | 3      |
| 25  | ORF68  | Camponotus_floridanus                                | 752871224         | 3      |
| 26  | ORF68  | Cephus_cinctus                                       | 1000753753        | 3      |
| 27  | ORF68  | Chlamydotis_macqueenii                               | 677160893         | 3      |
| 28  | ORF68  | Crassostrea_gigas                                    | 1139814932        | 3      |
| 29  | ORF68  | Cuculus_canorus                                      | 676590237         | 3      |
| 30  | ORF68  | Dendroctonus_ponderosae                              | 546685733         | 3      |
| 31  | ORF68  | Diaphorina_citri                                     | 662192917         | 3      |
| 32  | ORF68  | Diuraphis_noxia                                      | 985403395         | 3      |
| 33  | ORF68  | Dufourea_novaeangliae                                | 987914045         | 3      |
| 34  | ORF68  | Eufriesea_mexicana                                   | 1059214553        | 3      |
| 35  | ORF68  | Glossina_morsitans_morsitans                         | 83595237          | 3      |
| 36  | ORF68  | Gx                                                   | pending acc. num. | 3      |
| 37  | ORF68  | Habropoda_laboriosa                                  | 1059864473        | 3      |
| 38  | ORF68  | Harpegnathos_saltator                                | 749795708         | 3      |
| 39  | ORF68  | Helicoverpa_armigera                                 | 304423112         | 3      |
| 40  | ORF68  | Lasius_niger                                         | 861651735         | 3      |
| 41  | ORF68  | Lb                                                   | _PQAT000000000    | 3      |
| 42  | ORF68  | LbFV                                                 | 1148998769        | 3      |
| 43  | ORF68  | Lc                                                   | JUFY01000000      | 3      |
| 44  | ORF68  | Lh                                                   | pending acc. num. | 3      |
| 45  | ORF68  | Myzus_persicae                                       | 1230193237        | 3      |
| 46  | ORF68  | Nasonia_vitripennis                                  | 1032757220        | 3      |
| 47  | ORF68  | Opisthocornus_hoazin                                 | 677549512         | 3      |
| 48  | ORF68  | Papilio_machaon                                      | 930680047         | 3      |
| 49  | ORF68  | Papilio_xuthus                                       | 910339325         | 3      |
| 50  | ORF68  | Parasteatoda_tepidariorum                            | 1009572498        | 3      |
| 51  | ORF68  | Pogonomyrmex_barbatus                                | 769838565         | 3      |
| 52  | ORF68  | Polistes_canadensis                                  | 954577453         | 3      |
| 53  | ORF68  | Trichomalopsis_sarcophagae                           | 1227108847        | 3      |
| 54  | ORF68  | Trichoplusia_ni                                      | 6635437           | 3      |
| 55  | ORF68  | Vollenhovia_emeryi                                   | 795079157         | 3      |
| 56  | ORF72  | Lb_LbFV                                              | pending acc. num. | 3      |
| 57  | ORF72  | Lh_LbFV                                              | pending acc. num. | 3      |
| 58  | ORF72  | Lc_LbFV                                              | pending acc. num. | 3      |
| 59  | ORF72  | Glossina_pallidipes_salivary_gland_hypertrophy_virus | 168804090         | 3      |
| 60  | ORF72  | LbFV                                                 | 1148998771        | 3      |
| 61  | ORF78  | Lb                                                   | _PQAT000000000    | 3      |
| 62  | ORF78  | Lh                                                   | pending acc. num. | 3      |
| 63  | ORF78  | Lc                                                   | JUFY01000000      | 3      |
| 64  | ORF78  | LbFV                                                 | 1148998775        | 3      |
| 65  | ORF83  | Lb_LbFV                                              | pending acc. num. | 3      |
| 66  | ORF83  | Lh_LbFV                                              | pending acc. num. | 3      |
| 67  | ORF83  | Lc_LbFV                                              | pending acc. num. | 3      |
| 68  | ORF83  | Musca_domestica_salivary_gland_hypertrophy_virus     | 187903111         | 3      |
| 69  | ORF83  | Glossina_pallidipes_salivary_gland_hypertrophy_virus | 984290647         | 3      |
| 70  | ORF83  | Glossina_pallidipes_salivary_gland_hypertrophy_virus | 984290648         | 3      |
| 71  | ORF83  | LbFV                                                 | 1148998781        | 3      |
| 72  | ORF85  | Lb                                                   | _PQAT000000000    | 3      |
| 73  | ORF85  | Lh                                                   | pending acc. num. | 3      |
| 74  | ORF85  | Lc                                                   | JUFY01000000      | 3      |
| 75  | ORF85  | LbFV                                                 | 1148998786        | 3      |
| 76  | ORF87  | Lb                                                   | _PQAT000000000    | 3      |
| 77  | ORF87  | Lh                                                   | pending acc. num. | 3      |
| 78  | ORF87  | Lc                                                   | JUFY01000000      | 3      |
| 79  | ORF87  | Phthorimaea_operculella_granulovirus                 | 21686761          | 3      |
| 80  | ORF87  | Agrotis_segetum_granulovirus                         | 46309360          | 3      |
| 81  | ORF87  | Spodoptera_litura_granulovirus                       | 14836915          | 3      |
| 82  | ORF87  | Glossina_pallidipes_salivary_gland_hypertrophy_virus | 168804094         | 3      |
| 83  | ORF87  | Musca_domestica_salivary_gland_hypertrophy_virus     | 187903145         | 3      |
| 84  | ORF87  | Hemileuca_sp._nucleopolyhedrovirus                   | 529218126         | 3      |
| 85  | ORF87  | Spodoptera_frugiperda_granulovirus                   | 761719624         | 3      |
| 86  | ORF87  | Sucra_jujuba_nucleopolyhedrovirus                    | 960494866         | 3      |
| 87  | ORF87  | Glossina_pallidipes_salivary_gland_hypertrophy_virus | 984290700         | 3      |
| 88  | ORF87  | LbFV                                                 | 1148998788        | 3      |
| 89  | ORF92  | Lb                                                   | _PQAT000000000    | 3      |
| 90  | ORF92  | Lh                                                   | pending acc. num. | 3      |
| 91  | ORF92  | Lc                                                   | JUFY01000000      | 3      |
| 92  | ORF92  | LbFV                                                 | 1148998790        | 3      |
| 93  | ORF94  | Lb_LbFV                                              | pending acc. num. | 3      |
| 94  | ORF94  | Lh_LbFV                                              | pending acc. num. | 3      |
| 95  | ORF94  | Lc_LbFV                                              | pending acc. num. | 3      |
| 96  | ORF94  | Glossina_pallidipes_salivary_gland_hypertrophy_virus | 168804177         | 3      |
| 97  | ORF94  | LbFV                                                 | 1148998795        | 3      |
| 98  | ORF96  | Lb                                                   | _PQAT000000000    | 3      |
| 99  | ORF96  | Lh                                                   | pending acc. num. | 3      |
| 100 | ORF96  | Lc                                                   | JUFY01000000      | 3      |
| 101 | ORF96  | LbFV                                                 | 1148998797        | 3      |
| 102 | ORF107 | Lb_LbFV                                              | pending acc. num. | 3      |
| 103 | ORF107 | Lh_LbFV                                              | pending acc. num. | 3      |
| 104 | ORF107 | Lc_LbFV                                              | pending acc. num. | 3      |
| 105 | ORF107 | Glossina_pallidipes_salivary_gland_hypertrophy_virus | 168804057         | 3      |
| 106 | ORF107 | Musca_domestica_salivary_gland_hypertrophy_virus     | 187903107         | 3      |
| 107 | ORF107 | LbFV                                                 | 1148998799        | 3      |
| 108 | ITS2   | L.longipes                                           | AF015893.1        | S3     |
| 109 | ITS2   | L.guineensis                                         | AY124559.1        | S3     |
| 110 | ITS2   | L.victoriae                                          | AY124553.1        | S3     |
| 111 | ITS2   | L.heterotoma                                         | AB546896.1        | S3     |
| 112 | ITS2   | L.orientalis                                         | AY124563.1        | S3     |
| 113 | ITS2   | L.boulardi                                           | AY124568.1        | S3     |
| 114 | ITS2   | L.freyae                                             | AY124561.1        | S3     |
| 115 | ITS2   | L.fimbriata                                          | AF015894.1        | S3     |
| 116 | ITS2   | L.clavipes                                           | JQ808416.1        | S3     |
| 117 | ITS2   | L.australis                                          | AF015897.1        | S3     |
| 118 | ITS2   | G.xanthopoda                                         | AB678777.1        | S3     |

Table S1: Accession numbers of sequences used in the phylogenies

|    | primer_name | Orientation | tm    | GC | Seq                    | Prod.Size |
|----|-------------|-------------|-------|----|------------------------|-----------|
| 1  | Lb_ORF96_F  | FORWARD     | 59.99 | 55 | AATGGAGGACTACCGACACG   | 259       |
| 2  | Lb_ORF96_R  | REVERSE     | 59.62 | 47 | TGCACTGTGGTCCATAAACAG  |           |
| 3  | Lb_ORF92_F  | FORWARD     | 59.94 | 45 | TGACCAAGACATGGTGGAAA   | 248       |
| 4  | Lb_ORF92_R  | REVERSE     | 60.07 | 45 | CCGAATTGAATGACATGCTG   |           |
| 5  | Lb_ORF58_F  | FORWARD     | 59.65 | 50 | TACCAAATGGTGGAGGGAAC   | 250       |
| 6  | Lb_ORF58_R  | REVERSE     | 59.60 | 40 | CCATTTAAAACGTCGCAACA   |           |
| 7  | Lb_ORF68_F  | FORWARD     | 59.79 | 50 | TGTCTGGAGATTGCCATCAG   | 239       |
| 8  | Lb_ORF68_R  | REVERSE     | 60.04 | 45 | CCAATTTTCGGAAGTGAGGA   |           |
| 9  | Lb_ORF5F    | FORWARD     | 60.41 | 40 | GATTTCGCCAAATTTGATTGC  | 243       |
| 10 | Lb_ORF5R    | REVERSE     | 60.08 | 45 | ATCATCATTGTCAGCGTCCA   |           |
| 11 | Lb_ORF60F   | FORWARD     | 59.89 | 50 | ACGTACGATTGGCGTAAACC   | 235       |
| 12 | Lb_ORF60R   | REVERSE     | 60.84 | 55 | GACGTTGTTGTCCGAAGAGC   |           |
| 13 | Lb_ORF85F   | FORWARD     | 59.77 | 40 | CAGCTTTAGAACCCTGGGAAAA | 249       |
| 14 | Lb_ORF85R   | REVERSE     | 59.73 | 45 | GCCAACGCTGCACATTATTA   |           |
| 15 | Lb_ORF78F   | FORWARD     | 60.07 | 45 | CGATTTTGATGGTGATGCAG   | 251       |
| 16 | Lb_ORF78R   | REVERSE     | 59.31 | 40 | CATTTTCAATGCACGAAAGC   |           |
| 17 | Lb_ORF94F   | FORWARD     | 60.22 | 45 | TGCCGTGGAAGATACATTCA   | 252       |
| 18 | Lb_ORF94R   | REVERSE     | 58.85 | 50 | TCCACGCTAGACCATGTGTT   |           |
| 19 | Lb_ORF107F  | FORWARD     | 59.62 | 55 | CGACGCTATTGCAGTCAGTC   | 251       |
| 20 | Lb_ORF107R  | REVERSE     | 60.00 | 45 | GCGTCAGAAGCAACAAATGA   |           |
| 21 | Lb_ORF87F   | FORWARD     | 60.21 | 35 | TTGCAATATGCCACCAAAA    | 260       |
| 22 | Lb_ORF87R   | REVERSE     | 59.92 | 40 | GTTCCAGGCCAAAAATTTCA   |           |
| 23 | Lb_ORF72F   | FORWARD     | 59.96 | 45 | CTTTTGTGCGGATCTTTCAGC  | 236       |
| 24 | Lb_ORF72R   | REVERSE     | 60.66 | 55 | CTCCATTCTTGCTGGACAC    |           |
| 25 | Lb_ORF83F   | FORWARD     | 56.00 | 40 | ATTCCAATGGTTGGCGAATA   | 84        |
| 26 | Lb_ORF83R   | REVERSE     | 62.00 | 55 | CCGAGTGGAGTACACGTTTG   |           |
| 27 | Lb_RhoGapF  | FORWARD     | 56.00 | 40 | AATTCGGAAGCAATGGAAGA   | 325       |
| 28 | Lb_RhoGapR  | REVERSE     | 56.00 | 40 | ATCGCTTGGTTTCTTTTTC    |           |
| 29 | Lb.actineF  | FORWARD     | 66.00 | 65 | GATGCCCCGAGGCTCTCTTC   | 294       |
| 30 | Lb.actineR  | REVERSE     | 60.00 | 52 | TGTTGCCAAGGCAGTGATT    |           |
| 31 | Lb.shakeF   | FORWARD     | 64.00 | 60 | CGAGTTATCGGTGCGCTTCC   | 182       |
| 32 | Lb.shakeR   | REVERSE     | 62.00 | 55 | GCGAGGGACATCGCTTGATT   |           |

Table S2: Primers used in the paper.

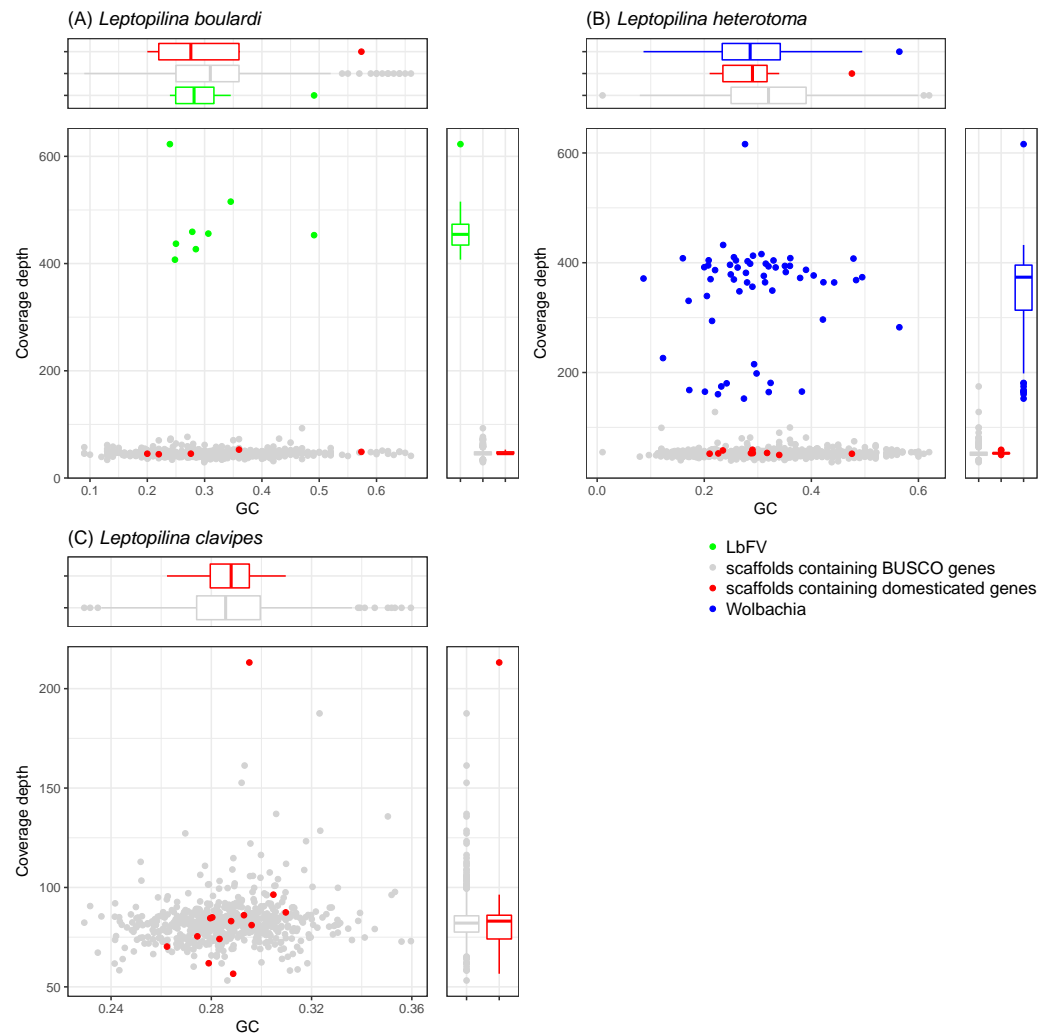

Figure S1: General features of scaffolds containing single copy universal arthropod genes (BUSCO gene set, in grey), scaffolds containing virally-derived loci (in red), scaffolds belonging to the virus LbFV (in green, only in *L. boulandi*) and of scaffolds belonging to *Wolbachia* endosymbiont (in blue, only in *L. heterotoma*). The heterogeneity in coverage depth for the *Wolbachia* scaffolds in *L. heterotoma* is probably the consequence of multi-infection with three *Wolbachia* strains having different densities[42]. (A) *L. boulandi*; (B) *L. heterotoma*, (C) *L. clavipes*.

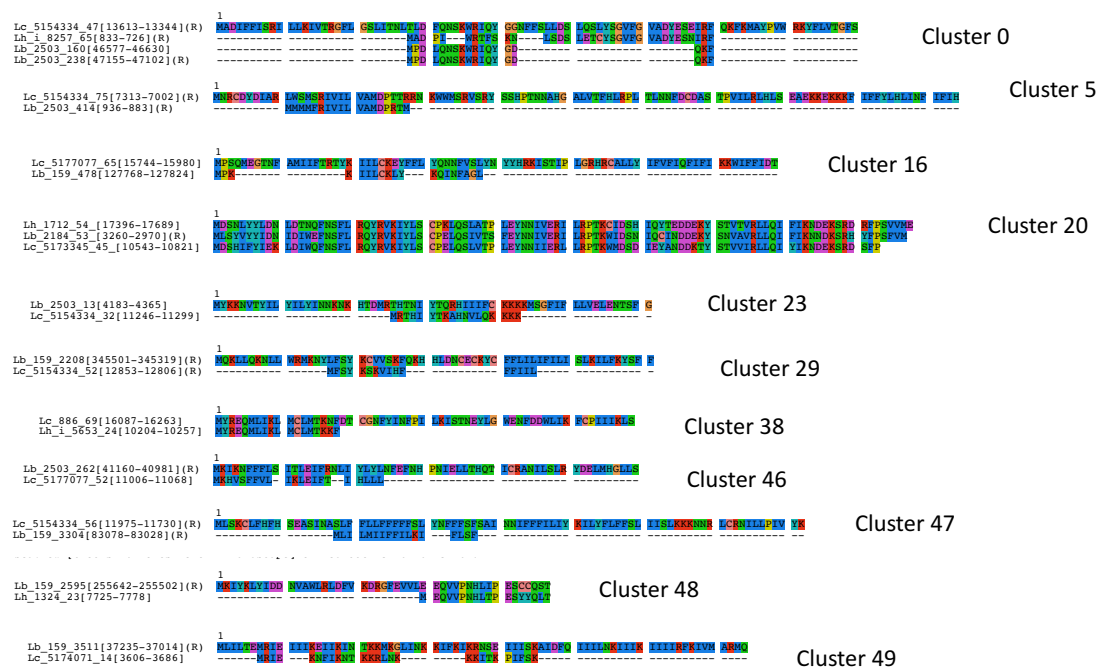

Figure S2: Flanking regions of virally-derived genes show similarities between *Leptopilina* species. Amino-acid sequences were predicted from the wasps scaffolds containing the virally-derived genes (but masked for the viral genes themselves) using getorf (-minsize 50 -find 1). They were clustered using CD-hit (-c 0.7), and aligned using muscle.

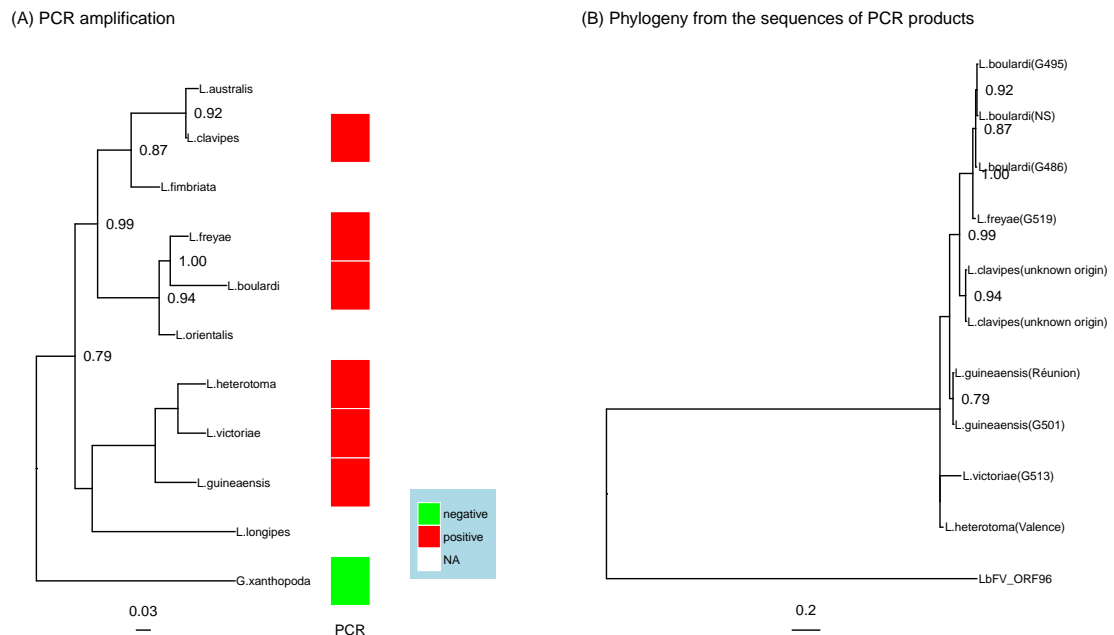

Figure S3: Amplification, sequencing and phylogeny of orthologs of LbFVORF96 in *Leptopilina* species. (A) Phylogeny of *Leptopilina* genus and *Ganaspis xanthopoda* based on internal transcribed spacer 2 (ITS2). (B) Phylogeny obtained after sequencing the corresponding PCR products. The stain used is indicated between brackets. Accession numbers are L.longipes:AF015893.1, L.guineaensis: AY124559.1, L.victoriae:AY124553.1, L.heterotoma:AB546896.1, L.orientalis:AY124563.1, L.boulardi:AY124568.1, L.freyae:AY124561.1, L.fimbriata:AF015894.1, L.clavipes:JQ808416.1, L.australis:AF015897.1, G.xanthopoda:AB678777.1.

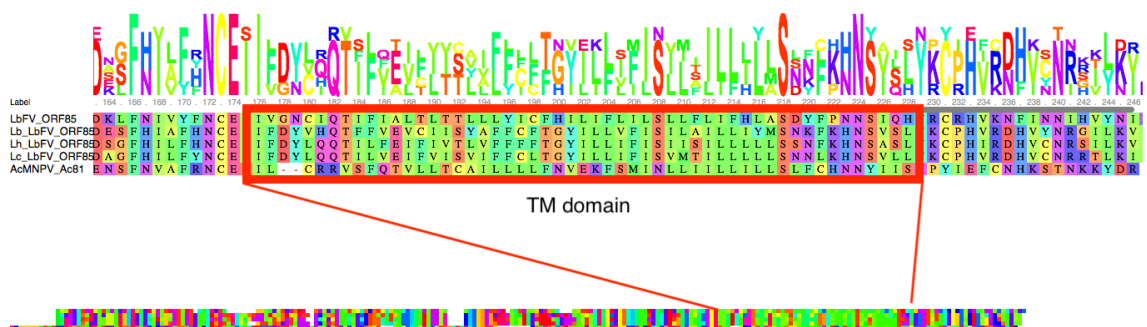

Figure S4: Ac81 homologs in LbFV and in *Leptopilina* genomes (ORF85) share a conserved hydrophobic, probably transmembrane domain.
