1 A behavior-manipulating virus relative as a  
2 source of adaptive genes for parasitoid wasps

3 D. Di Giovanni<sup>1</sup>, D. Lepetit<sup>1</sup>, M. Boulesteix<sup>1</sup>, Y. Couté<sup>3</sup>,  
M. Ravallec<sup>2</sup>, J. Varaldi<sup>1\*</sup>

4 **1** Laboratoire de Biométrie et Biologie Evolutive (UMR CNRS 5558), University  
5 Lyon 1 – University of Lyon, 43 boulevard du 11 novembre 1918, 69622 Villeurbanne  
6 cedex, France

7 **2** Unité BiVi (Biologie Intégrative et Virologie des Insectes), Université Montpellier  
8 II-INRA 1231, France

9 **3** Univ. Grenoble Alpes, CEA, Inserm, IRIG-BGE, 38000 Grenoble, France

10 \* corresponding author : julien.varaldi at univ-lyon1.fr

11 **Abstract**

12 To circumvent host immune response, some hymenopteran endo-parasitoids produce  
13 virus-like structures in their reproductive apparatus that are injected into the host  
14 together with the eggs. These viral-like structures are absolutely necessary for  
15 the reproduction of these wasps. The viral evolutionary origin of these viral-like  
16 particles has been demonstrated in only a few cases of wasp species all belonging to  
17 the Ichneumonoidea superfamily. In addition, the nature of the initial virus-wasp  
18 association remains unknown for all. This is either because no closely related  
19 descendant infects the wasps, because it has not been sampled yet, or because  
20 the virus lineage went extinct. In this paper, we show that the virus-like particles  
21 (VLPs) produced by endoparasitoids of *Drosophila* belonging to the *Leptopilina*  
22 genus (superfamily Cynipoidea) do have a viral origin, solving the debate on their  
23 origin. Furthermore, the ancestral donor virus still has close relatives infecting  
24 one of the wasp species, thus giving us insights on the ecological interaction that  
25 possibly allowed the domestication process. Intriguingly, this contemporary virus is  
26 both vertically and horizontally transmitted and has the particularity to manipulate  
27 the superparasitism behavior of the wasp. This raises the possibility that behavior  
28 manipulation has been instrumental in the birth of such association between wasps  
29 and viruses.

## 30 1 Introduction

31 Genetic information is typically passed on from generation to generation  
32 through reproduction, *ie* vertical transmission. However, at some point during  
33 the course of evolution, organisms may gain DNA from unrelated organisms,  
34 through horizontal gene transfer (HGT). Most horizontally acquired DNA  
35 is probably purged from the genomes of the population either because it  
36 did not reach the germinal cells in case of metazoan species and/or because  
37 no advantage is carried by the foreign sequence. However, natural selection  
38 may retain the foreign DNA leading ultimately to genetic innovation in the  
39 population/species [38].

40 The high frequency and relevance of such phenomenon has been recognized  
41 for decades for bacteria but was considered to have had a marginal impact  
42 on the evolution of metazoans[40]. However, this view has been recently  
43 challenged due to the discovery of numerous examples of HGT in metazoans  
44 with some of them leading to genetic innovation[8]. The most notorious  
45 example involves retroviral envelope genes that have been endogenized,  
46 domesticated and multiply replaced in mammalian genomes[45]. In this  
47 case, the fusogenic and immunosuppressive properties of these viral proteins  
48 (syncitins) have been repeatedly recruited to permit the evolution of placental  
49 structures during mammalian diversification. Interestingly, a similar case  
50 of syncitin domestication was recently described in a clade of viviparous  
51 Scincidae lizards that also rely on a placenta-like structure to feed their  
52 offspring [20]. Other examples include phytophagous mites and Lepidoptera  
53 that deal with chemical defenses of their host plant thanks to the acquisition  
54 of a bacterial gene involved in detoxification [79], several phytophagous  
55 arthropods (Aphids, mites and gall midges) who independently acquired  
56 genes involved in carotenoid biosynthesis from fungal donors[58][31][15], or  
57 parasitic nematodes that domesticated plant cell-wall degrading enzymes  
58 from bacteria[21].

59 Regarding the question of domestication of horizontally-transferred DNA  
60 in eukaryotes, endoparasitic wasps are of particular interest because they have  
61 repeatedly domesticated not only single genes but entire viral machineries  
62 (review in [27] and since then [10]). Endoparasitic wasps lay their eggs  
63 inside the body of other arthropods, usually other insects, ultimately killing  
64 them. Their progeny is thus exposed to the host immune system. Notably,  
65 it has been found that the ancestor of at least three monophyletic groups of  
66 endoparasitic wasps have independently domesticated a battery of viral genes  
67 allowing them to deliver either DNA encoding immuno-suppressive factors  
68 or immuno-suppressive proteins themselves [4][78][10]. Strikingly, in the case  
69 DNA is delivered into the host (so-called polydnviruses, PDV), it integrates

70 into the host hemocytes DNA and gets expressed [5][14], manipulating the  
71 host physiology and behavior, ultimately favoring the development of wasp  
72 offspring. In cases where proteins are delivered, the viral machinery permits  
73 the delivery of these virulence proteins into host immune cells, thus inhibiting  
74 the host immune response[67]. In both cases, virally-derived genes are used by  
75 the wasp to produce a vector toolset composed of capsids and/or envelopes.  
76 However, the virulence factors themselves (or the DNA encoding the virulence  
77 factors) are of eukaryotic origin, probably pre-dating the domestication event.  
78 Evolution has thus repeatedly favored the domestication of kits of viral genes  
79 allowing the production of virus-like structures in the reproductive apparatus  
80 of parasitic wasps with clear functional convergence.

81 One striking pattern emerging from the data, is that all described cases  
82 documented so far involve wasps belonging to the Ichneumonoidea superfamily  
83 [27]. Although this super-family is very speciose (most likely around 100,000  
84 species), it represents a modest fraction of parasitic Hymenoptera diversity  
85 (most likely around 1 million species[25]). Another feature of the current data  
86 is that the biology of the ancestral donor virus is completely unclear. For one  
87 such domestication event (in the Campopleginae sub-family, Ichneumonidae  
88 family), the ancestral virus has not been identified at all, whereas a beta  
89 nudivirus has been identified as the donor virus for wasps belonging to the  
90 microgastroid complex of the Braconidae family[4]. In *Venturia canescens*  
91 (Campopleginae sub-family, Ichneumonidae family), the unique case of viral  
92 replacement documented so far, and in some wasp species from the genus  
93 *Fopius* (subfamily Opiinae, Braconidae family), it has been shown that an  
94 alpha-nudivirus was the donor[65][10]. However, close relatives of the donor  
95 viruses are not known to infect present-day wasps, nor to infect their hosts.  
96 One possible explanation is that the "donor" viral lineages went extinct and/or  
97 have not been sampled yet. The exact nature of the association wasp/virus  
98 that permitted such massive domestication events is thus still unclear.

99 In this work, we identify a new independent case of virus domestication  
100 in the genus *Leptopilina* which belongs to a very distantly related wasp  
101 superfamily (Cynipoidea, Figitidae) compared to all previously described  
102 cases. Those wasps are parasitoids of *Drosophila* larvae. We show that  
103 the genes of viral origin permit all *Leptopilina* wasp species to produce so-  
104 called virus-like particles (VLPs). VLPs have been known for decades in this  
105 genus[68]. They are produced in the venom gland of the wasp, are devoid  
106 of DNA but contain virulence proteins that are injected, together with the  
107 egg, into the *Drosophila* larva[19]. They protect wasp eggs from *Drosophila*  
108 immune response [68][18]. We show that a close relative of the ancestral  
109 donor virus is still segregating in the species *L. boulandi* and its biology has  
110 been extensively studied by our group[53][62][54][48][76]. The virus, known as

111 LbFV, belongs to a possibly new dsDNA virus family related to Hytrosaviridae,  
112 and more distantly related to Nudiviridae and Baculoviridae[48]. The virus is  
113 vertically transmitted and manipulates the wasp behaviour by forcing infected  
114 females to lay their eggs into already parasitized larvae. This virus-induced  
115 "host-sharing" benefits to the virus since it allows its horizontal transmission  
116 to new parasitoid lineages. On the contrary, this "superparasitism" behaviour  
117 comes with a cost to wasp fitness, making it a nice example of behaviour  
118 manipulation[26]. This result suggests that heritable viruses such as LbFV,  
119 might have been instrumental in the birth of such association between wasps  
120 and viruses. In addition, it shows that virus domestication by parasitic wasps  
121 is not restricted to the Ichneumonoidea superfamily but may concern more  
122 diversity than previously thought.

## 123 2 Results

124 We analyzed the genomic sequences of *L. boulandi*[76], *L. clavipes*[41], *L.*  
125 *heterotoma* (this study) and a related species in the *Ganaspis* genus (*G.*  
126 *brasiliensis*, this study). All *Leptopilina* species as well as *G. brasiliensis*  
127 belong to the Figitidae family and are endoparasitoids developing from various  
128 species of *Drosophila*.

129 The basic statistics for the assemblies used in this paper are presented  
130 in table S1. With an N50 of 2080 bp the *G. brasiliensis* assembly appeared  
131 more fragmented than those from the *Leptopilina* species whose N50 ranges  
132 from 12807 bp to 17657 bp. This reflects its two to three times larger genome  
133 size likely due to its higher content in repetitive sequences (44.92% vs. 24.02-  
134 28.82%). All four genomes were sequenced with coverage depth above 24  
135 (between 24x and 85x), which is most likely sufficient to get the whole gene  
136 set[51]. Accordingly, a BUSCO[71] analysis revealed that the vast majority  
137 of the 1066 single copy genes expected to be found in most arthropods are  
138 indeed present in all four assemblies (from 96.6% in *G. brasiliensis* to 99.1%  
139 in *L. boulandi*), making these assemblies suitable for HGT detection (table  
140 S1).

141 We inferred the relationships among the wasps under study using a set of  
142 627 genes ubiquitous to all arthropods (see methods). As expected, the three  
143 *Leptopilina* species form a monophyletic clade with *L. heterotoma* being more  
144 closely related to *L. clavipes* than to *L. boulandi* (Fig. 1).

145 In order to identify putative horizontal transfers between an LbFV-like  
146 virus and the wasps, we blasted the 108 proteins encoded by the behaviour-  
147 manipulating virus that infects *L. boulandi* (LbFV) against the *Leptopilina*  
148 and *Ganaspis* genomes (tblastn). Interestingly, we found that 17 viral proteins

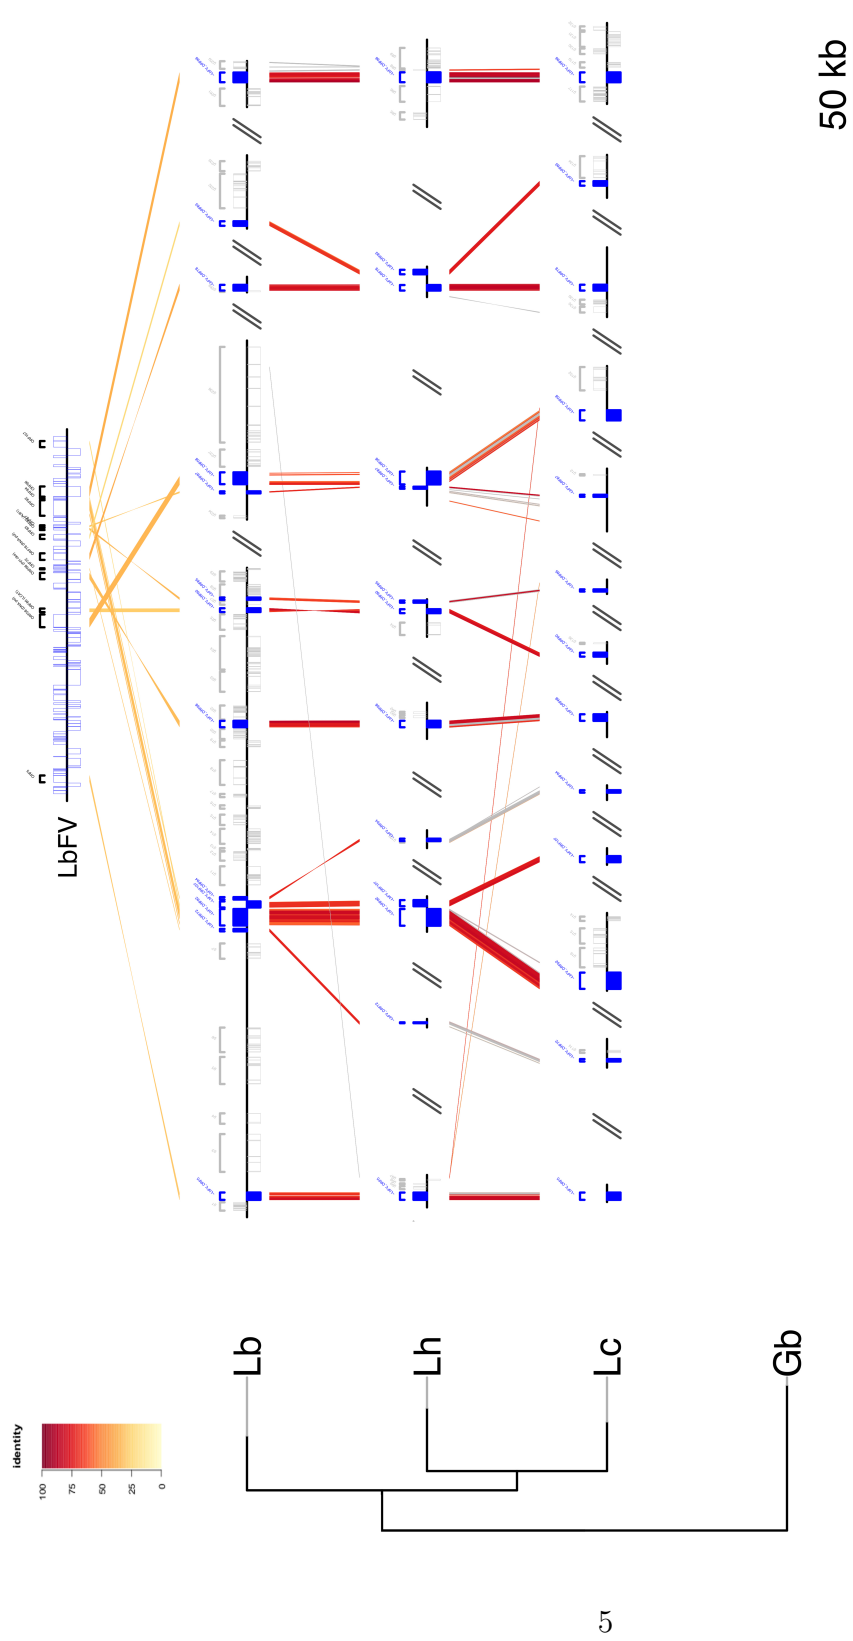

Figure 1: Comparative genomics of wasp scaffolds sharing similarities with virus proteins. Lb: *L. bouluardi*, Lh: *L. heterotoma*, Lc: *L. clavipes*, Gb: *Ganaspis brasiliensis*, LbFV: Leptopilina bouluardi Filamentous Virus. The species-tree on the left has been obtained using a concatenation of 627 universal arthropod genes. All branches (Lh-Lc and Lh-Lc/Lb) have an aLRT value of 1 (*Apis mellifera* was used as an outgroup). The red/yellow color code depicts the percentage of protein identity between homologous sequence pairs (viral or virally-derived loci). Grey connections indicate homology between regions that does not contain virally-derived loci. Genes of eukaryotic origin are depicted in grey on the scaffolds. The figure has been drawn using the genoPlotR package[34]. The scaffolds are ordered from left to right in an arbitrary manner.

149 had highly significant hits in wasp genomes ( $1.3 \times 10^{-178} < \text{e-values} < 10^{-5}$ ).  
150 Among them, two classes should be distinguished. The first class is composed  
151 of four viral genes (ORFs 11, 13, 27 and 66) that have strong similarities  
152 with both *Leptopilina* and *Ganaspis* genes (Fig. S1). We previously reported  
153 that these genes have probably been acquired horizontally by the virus from  
154 an ancestral insect before the *Leptopilina* diversification ([48], Fig. S1 &  
155 S2A). Two of them (ORFs 27 and 66) are predicted to encode inhibitors  
156 of apoptosis, whereas ORFs 11 and 13 encode a putative demethylase [48].  
157 These two last genes may derive from a single horizontal transfer followed by  
158 a subsequent gene duplication [48]. In the following section, we will focus on  
159 the second class of genes identified by this blast analysis.

## 160 **2.1 *Leptopilina* species captured 13 viral genes from** 161 **an LbFV-like virus**

162 More surprisingly, we found clear evidence that a single massive integration  
163 of viral DNA into wasp genomes occurred before the diversification of the  
164 *Leptopilina* genus and after the divergence between *Ganaspis* and *Leptopilina*.  
165 This event led to the integration of 13 viral genes into the genome of the  
166 wasps (Fig. S2B). The corresponding 13 viral proteins have highly significant  
167 hits with all *Leptopilina* species ( $4.10^{-4} < \text{e-values} < 1.310^{-178}$ , median =  
168  $10^{-33}$ ), but not with *G. brasiliensis*. The percentages of identity between  
169 these 13 LbFV proteins and *Leptopilina* homologs ranged from 21.9 to 41.9  
170 (table 1 and fig. S3-S15). All 13 loci displayed complete open reading frame  
171 (ORF) starting with a methionine and ending with a stop codon in the three  
172 wasp species, and their length was very similar to the corresponding ORF in  
173 LbFV genome (supplementary tables S2, S3 and S4; the regression slopes of  
174 ORF length in the wasp versus ORF length in LbFV were respectively 0.95,  
175 1.02 and 0.894 for *L. boulardi*, *L. heterotoma* and *L. clavipes*; all  $R^2 > 0.95$   
176 and all p-values  $< 10^{-9}$  on 11 d.f.). This suggests that those genes do not  
177 contain intron.



| query    |             | <i>L. bouleardi</i> |            |        | <i>L. heterotoma</i> |            |        | <i>L. clavipes</i> |            |        |          |
|----------|-------------|---------------------|------------|--------|----------------------|------------|--------|--------------------|------------|--------|----------|
| query_id | Length      | identity            | aln.length | evalue | identity             | aln.length | evalue | identity           | aln.length | evalue |          |
| 1        | LbFV_ORF5   | 696                 | 34.40      | 366    | 5.5e-41              | 29.70      | 370    | 3e-37              | 33.10      | 366    | 1.9e-40  |
| 2        | LbFV_ORF72  | 106                 | 31.80      | 107    | 5.2e-10              | 28.60      | 70     | 4e-04              | 32.70      | 107    | 8.8e-09  |
| 3        | LbFV_ORF92  | 1593                | 33.80      | 1058   | 2.9e-151             | 38.10      | 501    | 5e-94              | 33.70      | 998    | 3.1e-136 |
| 4        | LbFV_ORF107 | 625                 | 29.80      | 322    | 1.3e-11              | 27.10      | 170    | 9e-09              | 28.30      | 378    | 5.3e-10  |
| 5        | LbFV_ORF94  | 182                 | 29.00      | 176    | 5.5e-14              | 27.60      | 174    | 1e-11              | 27.00      | 174    | 1.2e-12  |
| 6        | LbFV_ORF68  | 645                 | 34.10      | 646    | 6.7e-99              | 32.60      | 660    | 3e-92              | 34.00      | 674    | 3.5e-103 |
| 7        | LbFV_ORF60  | 362                 | 32.60      | 377    | 2.4e-36              | 26.00      | 381    | 7e-30              | 31.80      | 384    | 1.4e-33  |
| 8        | LbFV_ORF85  | 215                 | 36.40      | 225    | 3.0e-26              | 35.20      | 219    | 1e-23              | 33.00      | 218    | 1.3e-23  |
| 9        | LbFV_ORF87  | 176                 | 30.90      | 162    | 6.5e-12              | 29.00      | 162    | 1e-05              | 31.50      | 165    | 3.6e-11  |
| 10       | LbFV_ORF58  | 1308                | 36.70      | 932    | 1.3e-129             | 31.50      | 1378   | 8e-158             | 31.50      | 1042   | 1.8e-120 |
| 11       | LbFV_ORF78  | 676                 | 40.10      | 670    | 1.2e-134             | 41.00      | 646    | 2e-123             | 41.00      | 675    | 3.7e-135 |
| 12       | LbFV_ORF83  | 433                 | 24.80      | 435    | 1.6e-15              | 21.90      | 429    | 8e-15              | 24.50      | 436    | 1.8e-20  |
| 13       | LbFV_ORF96  | 1048                | 41.90      | 1024   | 4.0e-169             | 36.60      | 1043   | 2e-164             | 40.40      | 1013   | 1.3e-178 |

Table 1: Blast hits for the 13 viral proteins against *Leptopilina* genomes (tblastn).

178 To define a set of expected features for typical scaffolds belonging to wasp  
179 genomes, we calculated the GC content and sequencing depth for scaffolds  
180 containing single-copy arthropod-universal BUSCO genes (Fig. S16). This is  
181 important since it allows one to distinguish genetic entities that may take  
182 part of the sample that have been sequenced. GC usually varies according to  
183 genomes, and coverage depth is directly related to the relative concentration  
184 of the DNA sequence under consideration. Except for one *L. clavipes* scaffold  
185 (scf7180005174277) encoding an homolog of ORF68, the general features (GC,  
186 sequencing depth) of wasp scaffolds sharing similarities with LbFV proteins  
187 were very similar to those calculated for the BUSCO-containing scaffolds  
188 (tables S2, S3, S4 and fig. S16). On the contrary, by analysing these statistics  
189 (GC and coverage), we could easily detect the presence of some known extra-  
190 chromosomal symbionts such as the virus LbFV in *L. bouleardi* (Fig. S16A),  
191 or the bacteria *Wolbachia* in *L. heterotoma* (Fig. S16B). In addition, several  
192 typical intron-containing eukaryotic genes were predicted in the vicinity of  
193 these genes (depicted in grey in Fig. 1). Note that apart from these 13  
194 loci specifically found in *Leptopilina* genomes, most flanking *Leptopilina*  
195 predicted proteins were also detected in the *G. brasiliensis* genome (66/72 for  
196 *L. bouleardi*, 8/11 for *L. heterotoma* and 10/15 for *L. clavipes*) showing that  
197 the absence of homologs in *G. brasiliensis* genome was not the consequence  
198 of a less reliable assembly. Taken together, these observations demonstrate

199 that the *Leptopilina* scaffolds containing viral-like genes are part of the wasp  
200 genomes. The special case of scf7180005174277 in *L. clavipes* assembly may  
201 be the consequence of recent duplications for this gene, possibly explaining  
202 its higher coverage depth.

203 The evolutionary history of the thirteen genes is consistent with an  
204 horizontal transfer from an ancestor of the virus LbFV (or a virus closely  
205 related to this ancestor) to *Leptopilina* species (Figure 2). Indeed, when  
206 other sequences with homology to the proteins of interest were available in  
207 public databases, the three wasp genomes always formed a highly supported  
208 monophyletic clade with LbFV as a sister group of *Leptopilina* sequences  
209 (ORFs 58, 78, 92, 60, 68, 85, 96). In addition, for the 6 remaining phylogenies  
210 (for which no homologs was available in public databases), the mid-point  
211 rooting method always led to similar topologies with LbFV as the sister group  
212 of *Leptopilina* sequences. Furthermore, the divergence LbFV-*Leptopilina*  
213 relative to the divergence among *Leptopilina* species was identical for both  
214 types of loci (Fig. S17), further suggesting that both loci have the same  
215 evolutionary history. Interestingly, it appeared from this analysis of ORF60,  
216 that before being transferred to *Leptopilina* wasps, the gene has probably been  
217 acquired by the donor virus from an ancestral bacteria (Figure 2).

218 The clustering of most of these loci on the same scaffold in *L. boulardi* (8  
219 out of 13 on scaffold 159, N=75550 scaffolds, see Figure 1) strongly suggests  
220 that a single event is at the origin of the phenomenon. In addition, for a  
221 few pairs of *L. boulardi* and *L. heterotoma* scaffolds, it was possible to test  
222 for the synteny of their virally-derived genes (ORFs 92 and 107 in scaffolds  
223 159 in Lb and IDBA\_7081 in Lh, and ORFs 87 and 58 in scaffolds 2503  
224 of Lb and IDBA\_5653 in Lh). In all cases, the synteny appeared to be  
225 maintained between the two *Leptopilina* species (Fig. 1). In addition, a  
226 few flanking non-virally derived sequences were co-occurring around the same  
227 viral genes in different *Leptopilina* species (grey connections in Fig.1, see Fig.  
228 S18 for details). The overall shared organization of these genes in the three  
229 *Leptopilina* species suggests that they have been vertically inherited since a  
230 single ancestral endogenization event.

231 To further assess the distribution of those virally-derived genes in the  
232 diversity of *Leptopilina* wasps, we designed primers for ORF96 which is the  
233 most conserved gene. We successfully PCR amplified and sequenced the  
234 corresponding PCR product from DNA extracts obtained from all *Leptopilina*  
235 species tested (*L. guineaensis*, *L. freyae*, *L. victoriae* in addition to *L. boulardi*,  
236 *L. heterotoma* and *L. clavipes*, figure S19A). The phylogeny obtained after the  
237 sequencing of the PCR products was congruent with the species-tree estimated  
238 from a phylogeny based on ITS2 sequences (Fig. S19B). As expected, no  
239 PCR product was obtained from *Ganaspis brasiliensis* extracts.



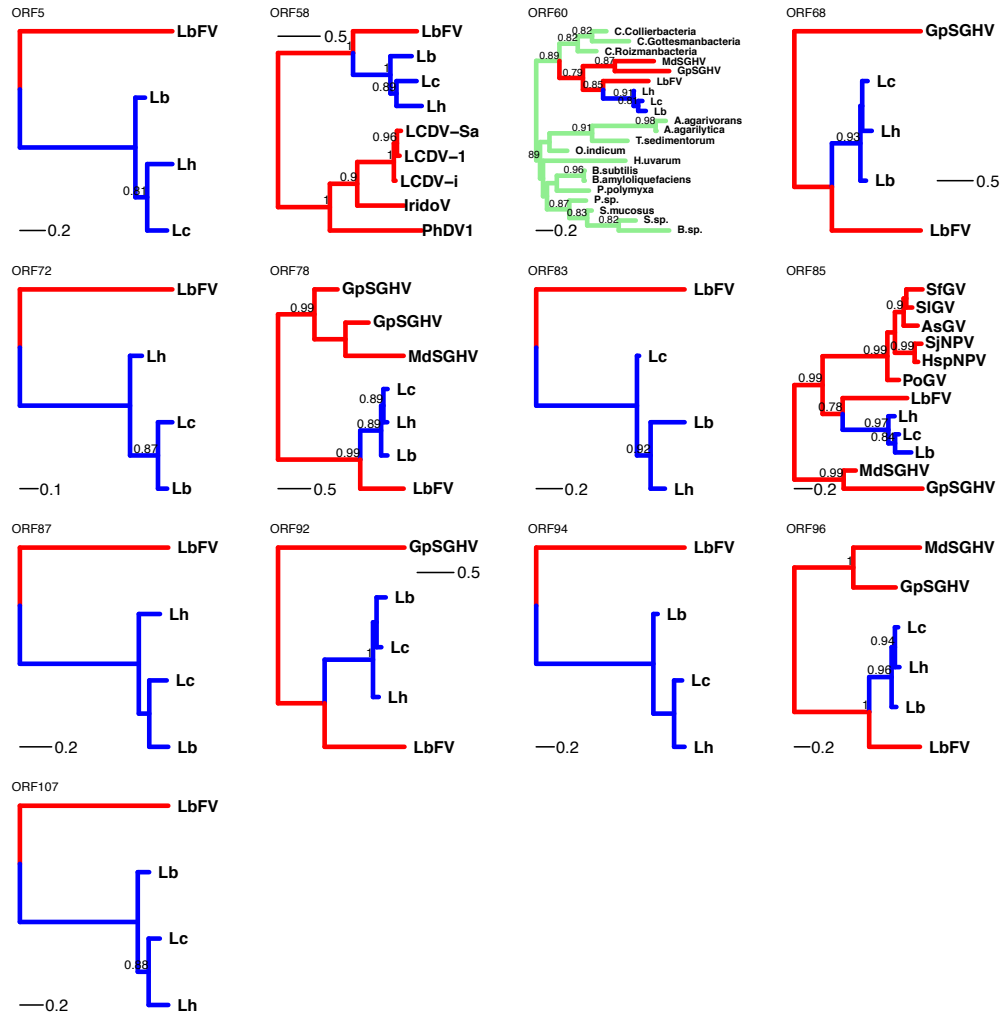

Figure 2: Phylogenetic evidence for a massive horizontal transfer of thirteen viral genes into the genome of *Leptopilina* wasps. The names of the ORFs refers to the ORF number in LbFV genome. Blue, red and green colors represent respectively (supposedly) eukaryotic, viral or bacterial branches. Only aLRT supports  $\geq 0.7$  are shown. The mid-point rooting method was used. Accession numbers of the corresponding sequences are available in table S5.

## 240 **2.2 Virally-derived genes are under strong purifying** 241 **selection in wasp genomes**

242 In order to assess the way natural selection have acted on these virally-  
243 derived genes since their endogenization, we calculated the dN/dS ratios  
244 using alignments involving the three *Leptopilina* species. We also calculated  
245 dNdS ratios for a set of 942 genes found in the three *Leptopilina* species and  
246 that are also shared by at least 90% of all arthropods[71]. Those genes  
247 are thus expected to be under strong purifying selection. Accordingly,  
248 the "universal" arthropod gene set had a very low dN/dS mean value  
249 (mean=0.114, median=0.085), with a distribution skewed towards 0 (Figure  
250 S20). Interestingly, the thirteen virally-derived genes had very low and very  
251 similar dN/dS values (mean=0.215, median=0.222, min=0.125, max=0.284),  
252 suggesting that they are all as essential for the survival and/or reproduction  
253 of *Leptopilina* wasps as any "universal" arthropod gene.

## 254 **2.3 Virally-derived genes are only expressed in female** 255 **venom glands at the onset of VLPs production**

256 All *Leptopilina* species studied so far (*L. heterotoma*, *L. bouvardi* and *L.*  
257 *victoriae*) produce VLPs in their venom gland [68][24][57]. As expected,  
258 we found that *L. clavipes* also produce VLPs in their venom gland, further  
259 suggesting that this is a general feature for all *Leptopilina* species (Fig.  
260 S21). Because VLPs are known to protect their eggs from *Drosophila* immune  
261 reaction in *Leptopilina*[68][42][57], we wondered whether the 13 virally-derived  
262 genes were in fact responsible for their production. Under this hypothesis,  
263 our prediction was that the 13 genes would be expressed only in the venom  
264 gland of females since VLPs are specifically produced in this tissue, and only  
265 when VLPs are being produced.

266 To test this idea, we measured the expression of the 13 virally-derived  
267 genes in the venom glands, ovaries, rest of the body of *L. bouvardi* females,  
268 and also in *L. bouvardi* males. We followed their expression from the very  
269 beginning of the pupal stage (day 11) until the emergence of the host (day  
270 21). During that period, the venom gland is being formed and is matured  
271 (Fig. S22). The venom gland produces the VLPs that are released in the  
272 lumen (Fig. 6) and that finally reach the reservoir where they are stored until  
273 the emergence (see the size of the reservoir in Fig. S22E).

274 The patterns of expression of all 13 genes fit our prediction: they are all  
275 specifically expressed in the venom glands of females but not in other tissues,  
276 nor in males (Fig. 4). Some virally-derived genes were particularly expressed  
277 at the very beginning of venom gland morphogenesis (day 11), whereas the

278 other genes had their peak of expression at day 14, when the reservoir of the  
279 gland starts to be filled with VLPs.

280 Two sets of genes could also be identified base on their level of expression.  
281 One set of genes had an expression between 3 and 12 times that of the actin  
282 control gene (ORFs 94, 107, 60 , 83 and 85), whereas the other genes had  
283 lower levels of expression, below 1.8 times that of the actin control (ORFs  
284 5,72,68, 92, 87, 58, 78). ORF96 was even below the detection threshold in  
285 our assay.

286 Finally, we also measured the expression of a wasp virulence protein,  
287 known as a major component of wasp venom, most likely wrapped within  
288 the VLPs in *Leptopilina boulardi* (the RhoGAP LbGAP [43], [19], [28]).  
289 Contrary to the 13 virally-derived genes, this virulence protein has a eukaryotic  
290 origin[19]. As expected, this gene is also specifically expressed in the venom  
291 gland, and transcription starts just after the 14-day peak observed for most  
292 virally-derived genes. Interestingly, among "early" virally-derived genes, we  
293 identified a putative DNA polymerase (ORF58, see table 2). This opened the  
294 fascinating possibility that the DNA encoding those genes is amplified during  
295 this biological process.

## 296 **2.4 Most virally-derived genes but not the major wasp** 297 **virulence factor are amplified in the venom gland**

298 Using real-time PCR, we measured the relative DNA levels of each gene  
299 compared to an actin single copy locus. As in the transcription assay, we  
300 measured it in the venom gland, ovaries, rest of the body and in males of  
301 *L. boulardi*. We also included another single copy gene (shake) as a control.  
302 As expected the relative copy number of shake did not show any trend in  
303 time, nor differences between tissues, thus validating our assay (Fig. 5). We  
304 observed similar "flat" patterns for ORF87, ORF58 and ORF96 although a  
305 statistically significant effect was detected at day 11 for ORFs 87 and 96. On  
306 the contrary, all other virally-derived genes were significantly amplified in the  
307 venom gland, but not in other tissues. This amplification was highly significant  
308 for most genes at day 14, were they all reached their peak of amplification.  
309 Interestingly, among the three genes that were not amplified is the putative  
310 DNA-polymerase (ORF58). This gene showed an early-transcription profile  
311 in the transcriptomic assay. The same "early-gene expression pattern" is

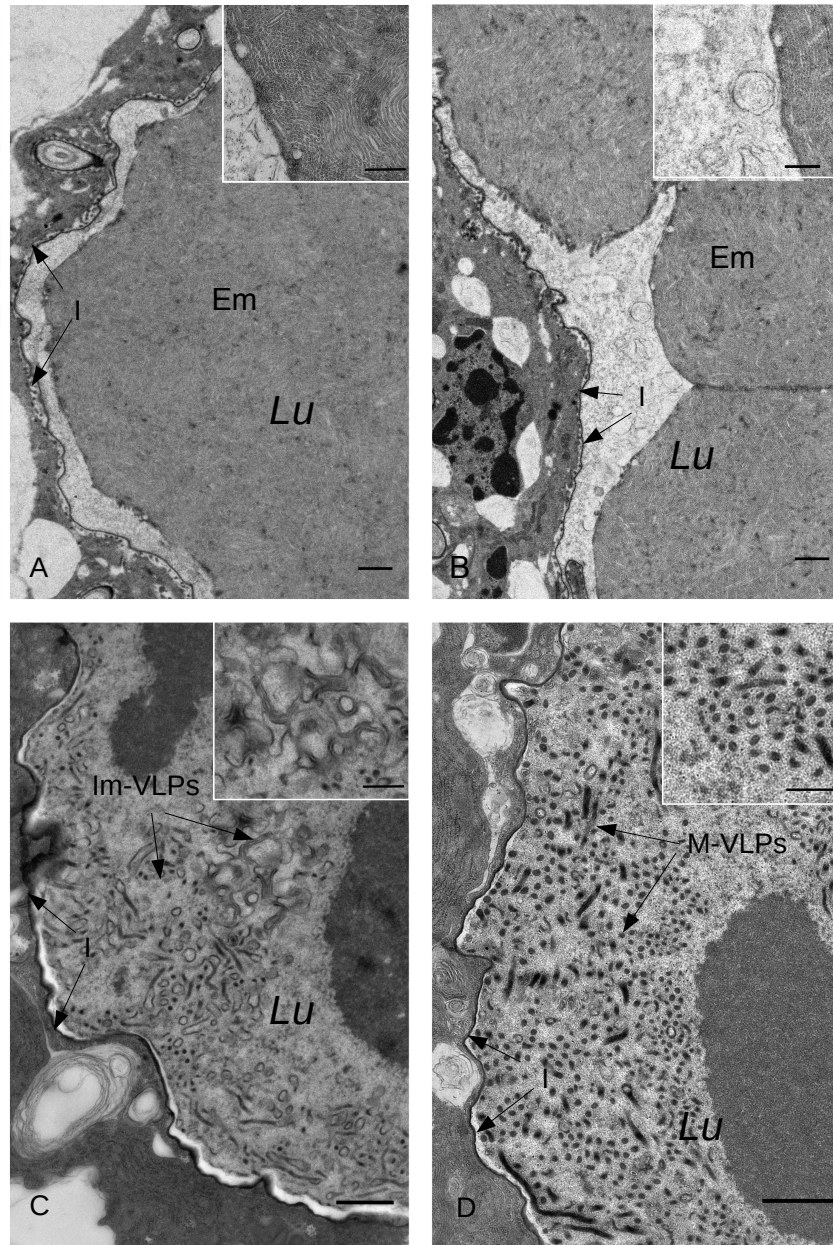

Figure 3: Biogenesis of VLPs in the venom gland of *L. bouvardi* during the pupal stage until adult emergence: (A) 14 days (pupae), (B) 16 days (pupae), (C) 18 days (pupae), (D) 21 days (adult). At days 14 and 16, secretory cells (SC) are releasing empty membranes (Em) into the Lumen (Lu) of the venom gland where they accumulate. Then at day 18, empty membranes starts to be filled with electron-dense material (probably virulence proteins, such as LbGAP) to produce immature VLPs (im-VLPs). Finally at emergence (day 21), the venom gland lumen is filled with mature VLPs (m-VLPs) ready to be injected into the host. I: cuticular intima delineating the lumen. Inserts show details of each image. Bars represent  $1\mu\text{M}$ , except in inserts where they represent  $500\mu\text{M}$ .

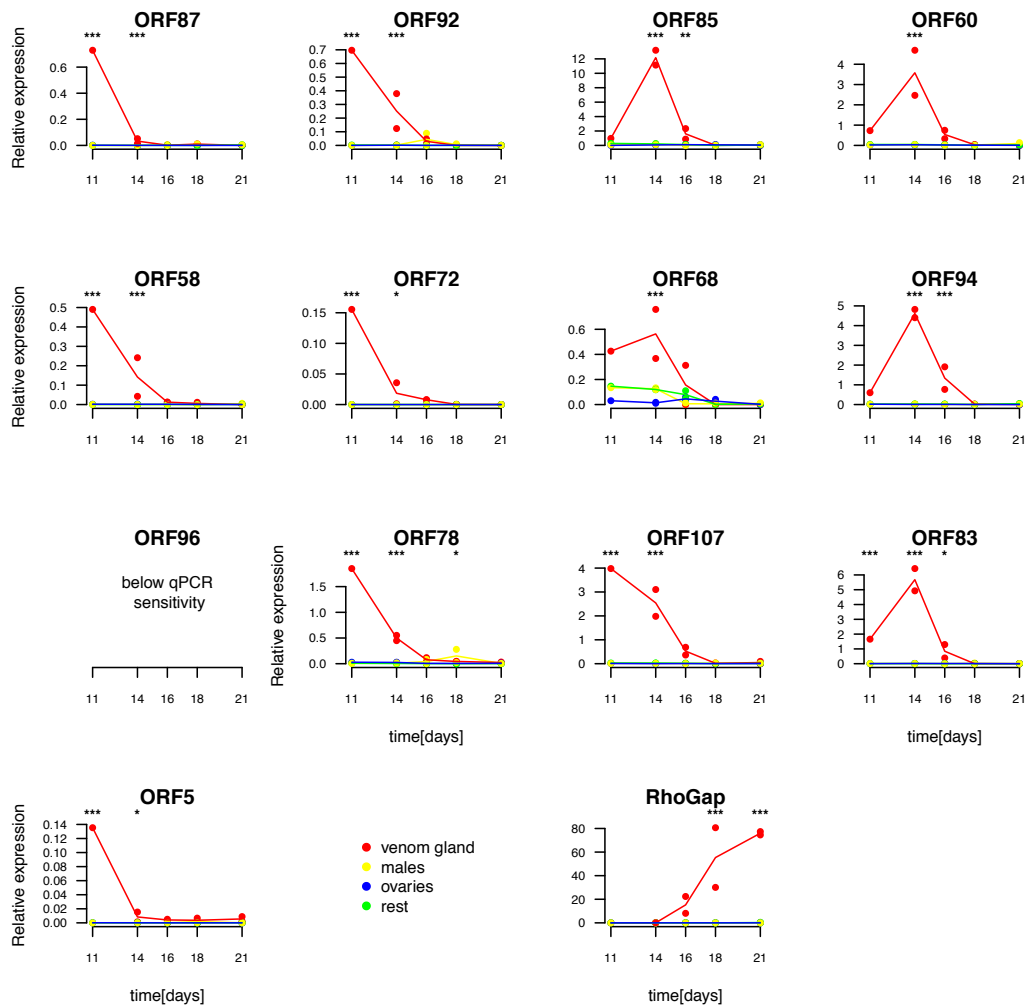

Figure 4: Expression of the 13 virally-derived genes and of the Rho-Gap in different tissues of *L. boulandi* from initial pupal stage to adult. x-axis represents days since egg-laying. 11 days corresponds to the beginning of the pupal stage and 21 days to the emergence of adults from the *Drosophila* puparium.



312 also observed for the other non-amplified gene (ORF87). For most virally-  
 313 derived genes, we observed a striking correlation between the transcription  
 314 and amplification profiles (compare figs. 4 and 5). Finally, our dataset  
 315 indicates that the gene encoding the major constituent of VLPs (LbGAP) is  
 316 not amplified (Fig. 5).

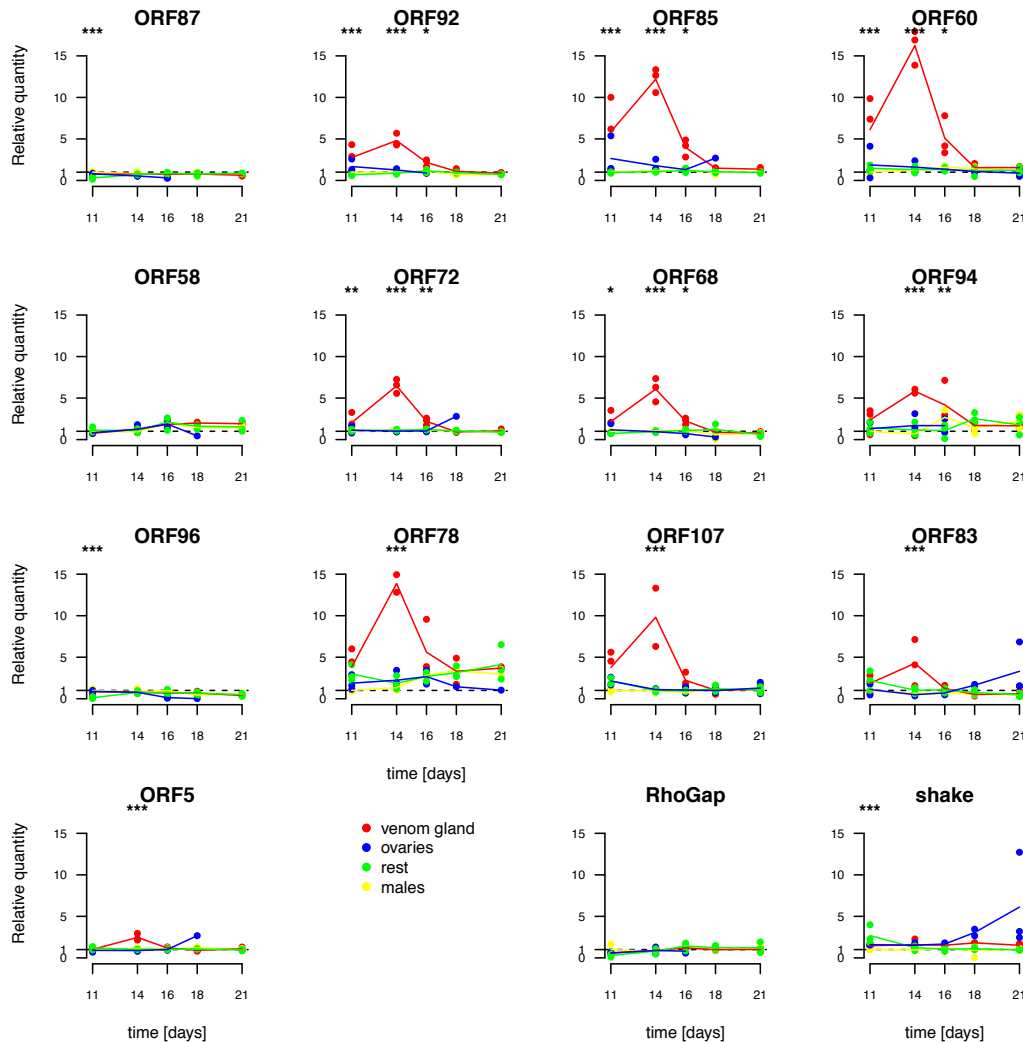

Figure 5: Genomic amplification of virally derived-genes measured by real time PCR in *L. boulearidi*. The relative quantity of each target gene is represented relative to the actin control gene and normalized by the ratio observed in males at day 11. The expected value under no amplification (relative quantity=1) is indicated as a dotted line. Stars correspond to the tissue effect tested at each time point (with holm correction for multiple tests) : \* < 0.05, \*\* < 0.01, \*\*\* < 0.001.



## 317 **2.5 A virally-derived protein is present in mature VLPs** 318 **of *Leptopilina sp.***

319 In order to further test the hypothesis that the virally-derived genes are  
320 involved in VLP formation, we purified VLPs from adult *L. bouvardi* females.  
321 Mass spectrometry-based proteomics was then used to identify proteins present  
322 in two independent biological replicates (fig S23). This strategy allowed the  
323 identification of a total of 383 proteins, of which 236 were found in both  
324 replicates. Among these proteins, as expected, we were able to reproducibly  
325 identify typical virulence proteins known to be part of VLP content (such as  
326 the RhoGap LbGAP [19], superoxide dismutase [17], serpin [16] or calreticulin  
327 [82]) confirming that we correctly purified the proteins (supplementary table  
328 S7). More importantly, in both biological samples we found the presence  
329 of the endogenized version of LbFV ORF85 protein (3 peptides in sample  
330 1 and 2 in sample 2, supplementary table S7). Finally, we reanalyzed a  
331 similar proteomic dataset obtained by others [35] using the related species  
332 *L. heterotoma*. Again, we detected the endogenized version of LbFV ORF85  
333 protein (although with a single peptide, data not shown). Taken together,  
334 these data demonstrate that the virally-derived protein ORF85 encoded in  
335 the genome of *Leptopilina* species is part of mature VLPs.

## 336 **2.6 Annotation of virally-derived genes**

337 Out of the 13 viral genes, five had similarities with known protein domains  
338 (table 2). First, the viral protein ORF58 showed clear similarity with DNA  
339 polymerase B domain (e-value  $2.3 \times 10^{-20}$ ). The domain was also detected  
340 in wasp orthologs but only for the *L. clavipes* protein. For the other four  
341 proteins, similar domains were identified in both the LbFV sequence and  
342 the wasp sequences. ORF60 bears a lecithine cholesterol acyl transferase  
343 (LCAT) domain, ORF68 contains a PIF1-like helicase, ORF78 contains an  
344 RNA-polymerase domain. Finally, ORF85, which is detected in mature VLPs,  
345 contains an Ac81 domain, a conserved protein found in all Baculoviruses [61],  
346 and known to be involved in virus envelopment [23].

| locus | species              | alignment.start | alignment.end | envelope.start | envelope.end | accession  | family name        | hmm.start | hmm.end | hmm.length | bit.score | Individual.E.value | Conditional.E.value |
|-------|----------------------|-----------------|---------------|----------------|--------------|------------|--------------------|-----------|---------|------------|-----------|--------------------|---------------------|
| ORF58 | LbFV                 | 639             | 870           | 599            | 880          | PF00136.20 | DNA.pol.B          | 40        | 200     | 464        | 72.63     | 2.3e-20            | 1.4e-24             |
| ORF58 | <i>L. clavipes</i>   | 349             | 578           | 322            | 591          | PF00136.20 | DNA.pol.B          | 19        | 205     | 464        | 23.88     | 1.4e-05            | 1.7e-09             |
| ORF60 | LbFV                 | 76              | 172           | 57             | 351          | PF02450.14 | LCAT               | 66        | 165     | 392        | 30.75     | 1.6e-07            | 6.7e-11             |
| ORF60 | <i>L. boulandi</i>   | 121             | 218           | 105            | 234          | PF02450.14 | LCAT               | 76        | 172     | 392        | 25.45     | 6.6e-06            | 3.5e-09             |
| ORF60 | <i>L. heterotoma</i> | 120             | 218           | 103            | 284          | PF02450.14 | LCAT               | 76        | 173     | 392        | 27.26     | 1.8e-06            | 9.9e-10             |
| ORF60 | <i>L. clavipes</i>   | 120             | 367           | 103            | 398          | PF02450.14 | LCAT               | 76        | 280     | 392        | 25.24     | 7.6e-06            | 4.1e-09             |
| ORF68 | LbFV                 | 124             | 167           | 122            | 174          | PF05970.13 | PIF1-like helicase | 3         | 46      | 364        | 21.87     | 8.0e-05            | 3.3e-08             |
| ORF68 | LbFV                 | 248             | 320           | 226            | 379          | PF05970.13 | PIF1-like helicase | 103       | 171     | 364        | 15.24     | 8.3e-03            | 3.5e-06             |
| ORF68 | <i>L. boulandi</i>   | 138             | 181           | 138            | 191          | PF05970.13 | PIF1-like helicase | 1         | 44      | 364        | 11.92     | 8.4e-02            | 7.6e-05             |
| ORF68 | <i>L. boulandi</i>   | 273             | 344           | 261            | 388          | PF05970.13 | PIF1-like helicase | 104       | 175     | 364        | 11.54     | 1.1e-01            | 9.8e-05             |
| ORF68 | <i>L. heterotoma</i> | 139             | 182           | 139            | 193          | PF05970.13 | PIF1-like helicase | 1         | 44      | 364        | 11.49     | 1.1e-01            | 8.9e-05             |
| ORF68 | <i>L. heterotoma</i> | 283             | 353           | 260            | 396          | PF05970.13 | PIF1-like helicase | 104       | 174     | 364        | 16.27     | 4.0e-03            | 3.1e-06             |
| ORF68 | <i>L. clavipes</i>   | 142             | 183           | 141            | 193          | PF05970.13 | PIF1-like helicase | 2         | 43      | 364        | 8.51      | 9.2e-01            | 8.8e-04             |
| ORF68 | <i>L. clavipes</i>   | 284             | 339           | 265            | 358          | PF05970.13 | PIF1-like helicase | 103       | 158     | 364        | 12.71     | 4.8e-02            | 4.6e-05             |
| ORF78 | LbFV                 | 358             | 415           | 244            | 422          | PF00623.19 | RNA.pol.Rpb1.2     | 100       | 156     | 166        | 16.14     | 9.1e-03            | 5.4e-07             |
| ORF78 | <i>L. boulandi</i>   | 238             | 299           | 232            | 303          | PF00623.19 | RNA.pol.Rpb1.2     | 100       | 160     | 166        | 15.16     | 1.8e-02            | 1.1e-06             |
| ORF78 | <i>L. heterotoma</i> | 206             | 273           | 149            | 277          | PF00623.19 | RNA.pol.Rpb1.2     | 95        | 161     | 166        | 18.21     | 2.1e-03            | 1.2e-07             |
| ORF78 | <i>L. clavipes</i>   | 236             | 305           | 202            | 309          | PF00623.19 | RNA.pol.Rpb1.2     | 93        | 161     | 166        | 19.14     | 1.1e-03            | 1.3e-07             |
| ORF85 | LbFV                 | 56              | 201           | 5              | 201          | PF05820.10 | Ae81               | 28        | 181     | 181        | 77.15     | 1.1e-21            | 1.3e-25             |
| ORF85 | <i>L. boulandi</i>   | 62              | 214           | 41             | 214          | PF05820.10 | Ae81               | 26        | 181     | 181        | 74.16     | 9.0e-21            | 1.1e-24             |
| ORF85 | <i>L. heterotoma</i> | 63              | 213           | 34             | 213          | PF05820.10 | Ae81               | 29        | 181     | 181        | 78.91     | 3.1e-22            | 3.7e-26             |
| ORF85 | <i>L. clavipes</i>   | 59              | 212           | 34             | 212          | PF05820.10 | Ae81               | 25        | 181     | 181        | 73.61     | 1.3e-20            | 7.9e-25             |

Table 2: hmmer sequence analysis for the 13 proteins encoded by LbFV and their orthologs in *Leptopilina* wasps. Only hits with individual values < 0.15 are shown.

### 3 Discussion

In this paper, we showed that all *Leptopilina* species contain a set of genes of viral origin deriving from either a direct ancestor of LbFV or from a closely related one. We describe the genomic structure of those genes in details in *L. boulandi*, *L. heterotoma* and *L. clavipes*, for which the whole genome was obtained. In addition, we were able to detect the presence of one LbFV-derived gene (ORF96) in all *Leptopilina* DNA extracts tested so far, suggesting that those virally-derived genes are shared by all *Leptopilina* species. Finally, one virally-derived protein (ORF85) is detected in purified VLPs. From this analysis, we conclude that an ancestor of all *Leptopilina* species acquired a set of 13 viral genes deriving from a virus related to the behavior manipulating virus LbFV. These genes have been conserved in all *Leptopilina* species and allow them to produce immuno-suppressive VLPs. This is very likely the consequence of a single event.

So far, all studied *Leptopilina* species are known to produce VLPs in their venom gland [68][57][32]. We confirmed this result in *L. boulandi* and found typical VLPs also in *L. clavipes*, suggesting that all *Leptopilina* species do produce VLPs. These particles are produced at the pupal stage and are stored in the reservoir of the venom gland. During oviposition, females inject not only their egg(s) but also some VLPs into their *Drosophila* hosts. VLPs are conceptually similar to liposomes that would contain virulence proteins. VLPs then permit the wasp to address these proteins to *Drosophila*

369 immune cells [19]. The virulence proteins delivered to the target cells then  
370 induce important morphological changes in the lamellocytes, precluding them  
371 from initiating an efficient immune reaction against the parasitoid egg [19].  
372 Thus, the VLPs are essential for the reproduction of the wasps. Because  
373 the proteins wrapped within the VLPs have a eukaryotic origin and because  
374 neither viral transcripts, viral proteins, nor viral DNA had been identified  
375 from venom gland analysis, it has been claimed that VLPs do not have a viral  
376 origin [66, 35]. In addition, the description of VLP proteins with eukaryotic  
377 microvesicular signature has been put forward as an evidence of a eukaryotic  
378 origin for these structures [35]. Following this argumentation, the authors  
379 proposed to change the denomination of VLPs for MSEV (mixed-strategy  
380 extracellular vesicle). On the contrary, our data strongly suggest that the  
381 VLPs found in *Leptopilina* do have a viral origin and derive from a massive  
382 endogenization event involving a virus related to an ancestor of the behaviour  
383 manipulating virus LbFV (Fig S2B). Under this scenario, present-day VLPs  
384 are indeed eukaryotic structures but evolved thanks to the endogenization  
385 and domestication of ancient viral genes. Nowadays, these structures allow  
386 the delivery of eukaryotic virulence proteins to *Drosophila* immune cells.

387 As expected from this hypothesis, we found that the virally-derived genes  
388 are specifically expressed in the venom gland, during the first part of the pupal  
389 stage, time at which the VLPs are beginning to be produced. In addition,  
390 those genes are under strong purifying selection, as could be expected for  
391 genes involved in the production of such fitness-related structures as VLPs.  
392 Analyzing the putative biological function of the genes brings additional  
393 support in favor of this hypothesis. Although 8 out of the 13 genes have no  
394 conserved domains, two of them have functions suggesting that they could be  
395 involved in membrane formation.

396 The first one is ORF60 which contains a lecithine cholesterol acyl transferase  
397 (LCAT) domain. In humans, LCAT is involved in extracellular metabolism  
398 of plasma lipoproteins, including cholesterol. LCAT esterifies the majority  
399 of free cholesterol, catalyzing translocation of fatty acid moiety of lecithin  
400 (phosphatidyl choline) to the free 3-OH group of cholesterol. It thus plays a  
401 major role in the maturation of HDL (high-density lipoprotein cholesterol)  
402 [69]. This putative biological property makes sense under our hypothesis  
403 since VLPs resemble liposomes that may be composed of highly hydrophobic  
404 compounds such as cholesterol. We may thus speculate that ORF60 plays  
405 a crucial role in the early formation of the "empty" membranes observed in  
406 the lumen of the venom gland under transmission electron microscopy (Fig.  
407 2.3A-B). Interestingly, the phylogenetic reconstruction of this gene suggests  
408 that LbFV itself acquired LCAT gene from a bacterial donor species.

409 The second relevant gene is ORF85. ORF85 is an homolog of Ac81,

410 a conserved protein found in all Baculoviruses [61]. Its role has been  
411 recently deciphered in *Autographa californica* multiple nucleopolyhedrovirus  
412 (AcMNPV, [23]). During their cycle, baculoviruses first produce budded  
413 virions (BVs) and, late in infection, occlusion-derived virions (ODVs). After  
414 the initial infection, BVs are responsible for the spread of the infection from  
415 cell to cell within the infected insect. On the contrary, ODVs are only produced  
416 at the final stage of the infection. At that point nucleocapsids are retained  
417 in the nucleus where they acquire an envelope from microvesicles. They  
418 are then exported into the cytoplasm and are embedded into proteinaceous  
419 crystal matrix, thus forming occlusion bodies (OBs). The OBs are then  
420 released in the environment. OBs are absolutely necessary to initiate new  
421 insect infection through horizontal transmission. By a mutant analysis, Dong  
422 *et al.* [23] showed that Ac81 is necessary for the capsid envelopment and  
423 embedding within the occlusion bodies (OBs). They also showed that Ac81  
424 contains an hydrophobic transmembrane domain that is necessary for this  
425 step. Interestingly, all three orthologs in *Leptopilina* sp. also contain a TM  
426 domain (Fig. S24). Our hypothesis is that the homolog of Ac81 in *Leptopilina*  
427 species is involved in the wrapping of virulence proteins into the VLPs, which  
428 is observed at day 18 under electron microscopy (Fig. 2.3C). Interestingly,  
429 it has been found that the closest viral homolog of this protein (apart from  
430 LbFV) is a structural protein of the Hytrosaviridae GpSGHV. In line with  
431 this, we found that protein ORF85 is indeed part of mature VLPs in *L.*  
432 *boulardi* and *L. heterotoma* and very likely in all *Leptopilina* species. This  
433 protein thus probably plays a crucial role in wrapping virulence proteins into  
434 VLP membranes and/or in the fusion with the target *Drosophila* immune  
435 cells. Interestingly, a nudiviral homolog of Ac81 has also been domesticated  
436 by *Venturia canescens* where three paralogs are found [47].

437 The other genes containing a conserved domain reveal functions related  
438 to DNA replication and transcription. The presence of a putative DNA  
439 polymerase (ORF58) and an helicase (ORF68) may sound surprising if  
440 one considers that VLPs do not contain DNA, contrary to polydnaviruses.  
441 However, we observed that after the early transcription activation of the DNA  
442 polymerase (at day 11), 10 out of the 13 virally-derived genes were subsequently  
443 amplified (at day 14). This genomic amplification correlates very well with  
444 their respective expression profile which suggests that the transcriptomic  
445 regulation of these virally-derived genes is governed, at least partly, by the  
446 gene copy number in the cell. Interestingly, the DNA polymerase itself and  
447 the nearby virally-derived gene (ORF87) are not amplified, suggesting that  
448 the amplification depends on the location of the loci in wasp chromosome.  
449 It is unclear at that point whether the genomic amplification involves the  
450 production of circular or linear amplicons or concatemers, and where are

451 located the boundaries of the amplified loci. On the contrary, the gene  
452 encoding the major constituent of the VLPs (LbGAP), which does not have  
453 a viral-origin, is not genomically amplified, although it is highly transcribed  
454 from day 14 until the emergence of the wasp and finally detected in mature  
455 VLPs as a protein. This suggests that the virally-derived DNA polymerase  
456 targets some specific sequences flanking the amplified loci. The wasp genome  
457 also encodes a virally-derived RNA polymerase (ORF78) that is likely involved  
458 in the transcription of the virally-derived genes.

459 All together, our data strongly suggest that VLP production is possible  
460 thanks to the domestication of 13 virally-derived genes, captured from an  
461 ancestor of LbFV. Based on the clustering of the genes in *L. bouleari* assembly,  
462 and on the synteny conservation, we speculate that a single event led to the  
463 acquisition of the whole gene set. We can even hypothesize that a whole  
464 virus genome integrated into the chromosome of the *Leptopilina* ancestor.  
465 Several recent publications suggest that large, possibly full-genome insertions  
466 of symbiont into their host DNA do occur in the course of evolution, including  
467 from dsDNA viruses. For instance, whole genome sequencing of the brown  
468 planthopper revealed a total of 66 putative ORFs (74,730bp in total) deriving  
469 from a nudivirus genome, including 32 out of the 33 core nudiviral genes [13].  
470 Also, it has been recently shown that an almost complete *Wolbachia* genome  
471 has been integrated into the chromosome of its host the common pillbug  
472 *Armadillidium vulgare*, with dramatic consequences on its sex determinism  
473 system[46]. After this suspected full-genome insertion of an ancestor of LbFV,  
474 we speculate that subsequent rearrangements have eliminated unnecessary  
475 genes and finally scattered, to a certain degree, the 13 remaining genes. Better  
476 genome assemblies are now necessary to gain insights on this aspect of the  
477 domestication process in the different *Leptopilina* lineages.

478 Our results document a novel domestication event of viruses in parasitic  
479 wasps. Indeed, from a function point of view, the domestication we document  
480 here is very similar to what has been described in the microgastrid complex  
481 in Braconidae[4], in Campopleginae and Banchinae [78][3] and in Opiinae  
482 [10]. In all cases, it is thought that a single endogenization event led to  
483 the integration of viral DNA into wasp chromosomes, and subsequently to  
484 the evolution of a virally-derived system delivering virulence factors to host  
485 immune cells. Despite these similarities, the underlying mechanisms are  
486 different. In the braconidae *Cotesia congregata* and *Microplitis demolitor*  
487 and in the Campopleginae *Hyposoter dydimator*, the putative virally-derived  
488 genes are genomically amplified as well as the genes encoding the virulence  
489 factors[50][11][78], although different mechanisms are involved[11]. The main  
490 consequence of this amplification is the production of the DNA circles that  
491 are finally packed into the polyDNAviruses.

492 On the contrary in *Leptopilina boulardi*, we find that only the 13 virally-  
493 derived genes are amplified, but not the virulence gene RhoGAP. The  
494 *Leptopilina* system best resembles the VLP production observed in *Venturia*  
495 *canescens* in the sense that VLP do not contain DNA (contrary to PolyDNAviruses  
496 described above) but instead proteins[35]. In *Leptopilina*, the genomic  
497 amplification seems to be an original transcriptional mechanism occurring  
498 during the production of the VLPs membranes. Virally-derived genes are also  
499 amplified during VLP production in *V. canescens* [47].

500 From these examples, it is clear that the domestication of whole sets  
501 of viral genes have repeatedly occurred in endoparasitoid wasps belonging  
502 to the super-family Ichneumonoidea, with at least two events leading to  
503 polydnavirus systems (that address DNA circles encoding virulence factors to  
504 the host) in some Braconidae and Ichneumonidae and two events leading to  
505 the evolution of a VLP system (that address virulence proteins wrapped into a  
506 liposome-like structure to the host) in *Fopius species* (Opiinae) [10] and in *V.*  
507 *canescens* (Campopleginae) [36], [65]. Actually, this last VLP domestication  
508 in *V. canescens* better corresponds to a replacement of a PDV system by a  
509 VLP system[65], showing that domestication events have been frequent in this  
510 superfamily. With our results obtained on species belonging to the Figitidae  
511 family, which diverged from Ichneumonoidea 225My ago [64], it is tempting  
512 to extend this conclusion to other clades of Hymenoptera endoparasitoids.  
513 If this idea is confirmed, then a striking parallel comes up between virus  
514 domestication in Hymenoptera and syncytin domestication in mammals[45].  
515 In both cases, viral proteins have been repeatedly co-opted to permit cell-cell  
516 fusion, although in one case this is for materno-fetal communication and in  
517 the second case it is for virulence factor delivery. Future investigations should  
518 test more thoroughly this hypothesis.

519 One remaining open question for all those events, is the type of interaction  
520 the ancestral virus and its wasp did have before the domestication happened.  
521 Regarding this question, very few data are available up to now. For PDV  
522 found in campopleginae such as *H. dydimator* and in banchinae such as *Glypta*  
523 *fumiferanae*), the ancestral virus has not been clearly identified[78][3]. On the  
524 contrary, the putative virus donors have been identified as a beta-nudivirus for  
525 PDVs in braconidae[4], and as an alpha-nudivirus for VLPs found in *Venturia*  
526 *canescens*[65] and in *Fopius species*[10]. However, their closest viral relatives  
527 are not infecting hymenoptera, but rather other arthropods[73]. In addition,  
528 the endogenization event is ancient, at least for Bracoviruses, which is the  
529 only case for which an estimation exists (103My, [60]), rendering difficult  
530 the inferences on the type of association that existed upon emergence of the  
531 association. It is thus unclear what type of interaction did the ancestral virus  
532 have with its host before the endogenization process.



533 In *Leptopilina*, we unequivocally identified an ancestor (or a close relative)  
534 of the behaviour-manipulating virus LbFV as the donor virus. First, it should  
535 be noted that in previous cases for which the ancestor has been identified  
536 the donor virus has a large circular genome composed of a double stranded  
537 DNA. Our results again show the same pattern. Second, the previous studies  
538 repeatedly identified nudiviruses as the donor family. Here we identify a virus  
539 belonging to another, possibly new, virus family[48]. This virus is related to  
540 nudiviruses and baculoviruses, but is more closely related to the hytrosaviruses  
541 [2], which are known to induce Salivary Gland Hypertrophy in tsetse flies and  
542 house flies, although it can also remain symptom-less [1].

543 Finally, this is the first time that the identified virus ancestor still has  
544 extant relatives infecting one of the wasp species. From our previous work  
545 on the interaction between LbFV and its host *Leptopilina boulardi*, we know  
546 that LbFV is vertically transmitted and replicate in cells of the oviduct[77].  
547 This result suggests that physical proximity with the germ line may have  
548 facilitated the initial endogenization event, thus allowing the initiation of  
549 the domestication process. The identification of a contemporary virus still  
550 infecting the wasp also opens the way for addressing experimentally the  
551 mechanisms by which the virus could integrate into wasp chromosomes.  
552 Finally, LbFV is responsible for a behavior manipulation in *L. boulardi*: it  
553 forces females to superparasitize, which allows its horizontal transmission  
554 to other wasps[75]. This raises the fascinating possibility that the ancestral  
555 donor virus also manipulated the behavior of the wasp. To clarify this issue,  
556 the sampling of relatives of LbFV will be essential, to be able to reconstruct  
557 the ancestral state for the lineage that actually gave rise to such genetic  
558 innovation in wasp genomes.

## 559 4 Methods

### 560 4.1 Wasp rearing

561 *L. boulandi*, *L. heterotoma* and *G. brasiliensis* were reared on *D. melanogaster*  
562 as host (StFoy strain) in a climatic chamber (25C 60% humidity, 12/12  
563 LD). The *G. brasiliensis* strain was kindly provided by Dr. Shubha Govind,  
564 *L. clavipes* by Dr. Elzemiek Geuverink and *L. boulandi* and *L. heterotoma*  
565 strains were collected and identified by our group. *Drosophila* were fed with  
566 a standard medium [22]. All experiments on *L. boulandi* were performed on a  
567 strain uninfected with the behaviour-manipulating virus (NSref).

### 568 4.2 Wasp genome sequences and annotation

569 We previously reported the genome of *Leptopilina boulandi*, strain Sienna  
570 (accession number : PQAT00000000) which has been obtained from the  
571 sequencing of a single female[76]. Although this female was infected by LbFV,  
572 the draft genome does not contain contigs belonging to the virus genome since  
573 we removed them by comparison to the published virus genome sequence[48].  
574 The assembly was performed using IDBA\_ud [63] followed by a scaffolding  
575 step with assembled RNAseq reads using the software L\_RNA\_scaffolder [81].

576 We sequenced the genomes of the related *L. heterotoma* (Gotheron  
577 strain, accession number RICB00000000), and the more distantly related *G.*  
578 *brasiliensis* (Va strain, accession number RJVV00000000). *L. heterotoma* is  
579 refractory to infection by LbFV[62] and no reads mapping to LbFV genome  
580 has been found neither in *L. heterotoma* nor in *G. brasiliensis* datasets. We  
581 extracted the DNA of a single female abdomen using Macherey-Nagel columns,  
582 similarly to what was performed for *L. boulandi*[76]. The DNAs were then  
583 used to prepare paired-end Illumina libraries using standard protocols (TruSeq  
584 PE Cluster v3, TruSeq SBS 200 cycles v3, TruSeq Multiplex Primer). The  
585 libraries were then sequenced on a Hiseq2500 (for L.h, 2 x 100bp, insert size  
586 = 418bp) or Hiseq3000 (for G.b, 2 x 150bp, insert size = 438bp) machine on  
587 the Genotoul sequencing platform.

588 Similarly to what was done for *L. boulandi*, the drafts of *L.heterotoma*  
589 and *G.brasiliensis* were obtained after assembling genomic DNA reads with  
590 IDBA\_ud [63]. For *L. heterotoma* assembly, this was followed by scaffolding  
591 using publicly available assembled RNAseq reads[28] by running the software  
592 L\_RNA\_scaffolder[81]. This RNA-seq scaffolding step was not performed for  
593 *G. brasiliensis* because no RNAseq reads were available for this species in  
594 public databases.

595 The genome of an asexual strain of *L. clavipes* (strain GBW) which

596 is not infected by LbFV was obtained and is described in [41] (accession  
597 PRJNA84205). To have comparable assembly strategies, we included an  
598 additional RNA scaffolding step using publicly available sequences ([56]).

599 In order to test the completeness of the drafts generated, we ran the  
600 BUSCO pipeline (version 2.0) that looks for the presence of 1066 ubiquitous  
601 genes shared by at least 90% of all arthropods ([71]).

602 The genome sizes were estimated using several methods. First of all, we  
603 simply divided the total number of bases mapped to the draft by the mean  
604 coverage observed on scaffolds containing complete BUSCO genes. Those  
605 scaffolds are expected to contain non repeated nuclear DNA and their coverage  
606 is a valuable estimate of the coverage for any nuclear locus. Second, after  
607 filtering out adapters containing reads with Skewer version 0.2.2[39], removing  
608 reads duplicates with FastUniq version 1.1[80], filtering out reads mapping to  
609 mitochondrial contigs with Bowtie 2 version 2.3.4.1[44] and samtools version  
610 1.8[49], removing contaminant reads (from viruses, prokaryotes and microbial  
611 eukaryotes) with Kaiju 1.6.2 used with the NR+euk 2018-02-23 database[55],  
612 k-mers frequencies were established from the remaining reads for each species  
613 using Jellyfish 2.2.9[52] and  $k = 21$  (default value). From these 21-mers  
614 distributions genome size was estimated with findGSE[72] used with default  
615 parameters. These estimates were then used to run DNAPipeTE version  
616 1.3[30] (2 samples per run, 0.1X coverage per sample) in order to assess the  
617 repetitive fraction of the genomes. Finally, independant estimates from flow  
618 cytometry experiments were obtained for *L. bouleari*, *L. heterotoma* and *G.*  
619 *brasiliensis* from [29] and for *L. clavipes* from [41].

620 We predicted genes in wasp sequences using the software augustus 3.2.3  
621 [37], with training parameters obtained from the BUSCO outputs.

## 622 4.3 Homology search

623 In order to identify homologies between viral proteins and wasp DNA, we  
624 used a simple tblastn (v. 2.6.0) approach with viral proteins as query and  
625 each wasp genome as database. Default parameters were used except that an  
626 evaluate threshold of 0.01 was chosen.

## 627 4.4 Phylogenies

### 628 4.4.1 Species-tree

629 Based on 627 "universal arthropod" genes identified by the BUSCO pipeline  
630 [71], a species tree was constructed for *L. heterotoma*, *L. bouleari*, *L. clavipes*  
631 and *G. brasiliensis*, using *Apis mellifera* as outgroup. The protein sequences

632 were aligned using the bioconductor msa package[7]. Individual alignments  
633 were concatenated and a phylogenetic reconstruction was then performed  
634 using PhyML (parameters: -d aa -m LG -b -4 -v e -c 4 -a e -f m)[33]. In total,  
635 290428 variable sites were found and the branch supports were computed  
636 using approximate likelihood ratio test (aLRT). We also constructed a tree for  
637 10 *Leptopilina* species and *G. brasiliensis* using publicly available sequences of  
638 Internal transcribed spacer 2 (ITS2). Alignment was performed with muscle  
639 and a phylogeny was obtained with PhyML (parameters: -d nt -m GTR -b -4  
640 -v 0.0 -c 4 -a e -f e). In total, 399 variable sites were used and the tree was  
641 rooted using mid-point rooting method.

#### 642 4.4.2 Gene-tree

643 We searched orthologs of viral proteins of interest in other organisms by  
644 blasting (blastp) them against nr (downloaded on october 2017) with an  
645 evalue threshold of 0.01. After retrieving the sequences, we selected one  
646 sequence per species and added them to the proteins identified in *Leptopilina*  
647 genomes. The sequences were then aligned using muscle algorithm v3.8.31.  
648 Because the proteins included in the alignment diverged considerably, we  
649 selected blocks of conserved sites using the gblocks algorithm parametrized  
650 with less stringent options (allowing smaller final blocks, gaps within final  
651 blocks and less strict flanking positions, [12]). Phylogenetic reconstruction  
652 was then performed using PhyML (parameters: -d aa -m LG -b -4 -v e -c 4 -a e  
653 -f m). The branch supports were computed using approximate likelihood ratio  
654 test (aLRT). The accession numbers of the sequences used in the phylogenies  
655 are reported in table S5.

#### 656 4.5 PCR amplification of ORF96

657 Based on the sequences of *L. bouvardi*, *L. heterotoma* and *L. clavipes*, we  
658 designed primers for the orthologs of LbFVORF96. The primer sequences are  
659 ATTGGTGAAATTCAATCGTC and TCATTCATTCGCAATAATTGTG.  
660 They amplified a 411bp internal fragment of the coding sequence. PCR  
661 reaction was performed in a 25uL volume containing 0.2uM primers, 0.2mM  
662 dNTPs, 1mM MgCl<sub>2</sub> and 0.5U of Taq DNA polymerase with the following  
663 cycling conditions : 95 °C 30", 54 °C 30", 72 °C 60" (33 cycles).

#### 664 4.6 dN/dS calculation

665 The coding sequences of "universal arthropod" BUSCO genes identified  
666 in the three *Leptopilina* species were extracted and, using the msa and

667 seqnr R package, were reverse-aligned using the protein alignments as a  
668 guide (reverse.align function of the seqnr package). dN/dS ratios were then  
669 estimated using the kaks function of the seqnr R package. The method  
670 implemented in this package is noted LWL85 in [74]. A similar procedure was  
671 performed for the 13 virally-derived genes found in the genomes of the three  
672 *Leptopilina* species.

## 673 4.7 Expression in the venom gland and other tissues

674 We studied the expression of genes during the pupal stage of *L. boulardi*,  
675 at days 11, 14, 16, 18 and 21. The wasp strain used is not infected by the  
676 behaviour-manipulating virus LbFV. 11 days corresponds to the beginning of  
677 the pupal stage, whereas 21 days corresponds to the emergence time. Wasps  
678 were gently extirpated from the *Drosophila* puparium, and venom gland,  
679 ovaries, rest of the body of *L. boulardi* females was dissected in a droplet of  
680 PBS + 0.01% tween and deposited in the RLT+B-mercaptoethanol buffer of  
681 the Qiagen RNAeasy extraction kit. Males were also prepared as a control, in  
682 a similar way. The tissues extracted from twenty individuals were then pooled  
683 together and tissues were disrupted in a Qiagen homogenizer (3 minutes  
684 25Hz). Two biological replicates were performed for each condition, except  
685 for day 11 where only one sample was obtained. cDNAs were synthesized  
686 using the SuperscriptIII kit (ThermoFisher). Real-time PCR assays were then  
687 performed with SYBR green (ssoadvanced universal sybr green supermix,  
688 Biorad) using standard procedures on a Biorad CFX-96 machine. We  
689 quantified the number of copies of each target cDNA using a serial dilution  
690 standards. Because we obtained only tiny quantities of RNA from this  
691 experiment (because of the very small size of the tissues dissected), we were  
692 not able to test numerous genes. We thus choose to use only one control gene  
693 (actin gene). As a counterpart, we were able to test all thirteen virally-derived  
694 genes and the RhoGAP gene. The primer sequences are given in table S6.

## 695 4.8 Genomic Amplification

696 Using a similar assay, we extracted the DNA of *L. boulardi*, at days 11, 14, 16,  
697 18 and 21, using an uninfected strain (no LbFV present). The genomic DNA  
698 of 15 pooled individuals was extracted using the Nucleospin tissue Macherey-  
699 Nagel kit following provider's instructions. Three biological replicates per  
700 condition was done. Real-time PCR assays were then performed with SYBR  
701 green using standard procedures on a Biorad CFX-96 machine. We quantified  
702 the number of copies of each target genes using a serial dilution standards.  
703 The primer sequences are given in table S1. For an unknown reason, the

704 amplification with DNA extracted from ovaries was particularly difficult, in  
705 particular when the ovaries were mature (at day 21). We thus had to remove  
706 this tissue from the statistical analysis because Cqs were too high to be  
707 reliable. For the same reason, most data for ovaries at day 21 were removed  
708 from figure 5. The primer sequences are given in table S6. Shake and actin  
709 genes were chosen as single copy genes. This was checked by looking at the  
710 blast results using each primer set (a single 100% match was observed for both  
711 pairs of primers). Accordingly, a single band of the expected size was observed  
712 on a gel and the expected sequence was obtained after Sanger-sequencing for  
713 both loci.

## 714 4.9 Statistical analysis

715 For both the transcriptomic and genomic analysis, we calculated the absolute  
716 copy number of each gene of interest and divided it by the absolute copy  
717 number of the actin control gene. This ratio was then analyzed in an anova  
718 framework with time, tissue and time:tissue interaction as factors. The effects  
719 were tested by likelihood ratio tests (LRT) of full model versus reduced  
720 one. Contrasts between tissues were also calculated at each time point  
721 (corresponding to the star in figures 4 and 5). Residuals of the models were  
722 judged as unstructured and had an overall normal distribution.

## 723 4.10 Morphogenesis and electron microscopy of the 724 venom gland

725 To follow the morphogenesis of the venom gland, we dissected *L. bouleardi*  
726 pupae at days 11, 14, 16, 18 and 21, in a similar design used for transcriptomics.  
727 Wasps were gently extirpated from the *Drosophila* puparium, and the venom  
728 gland of females was dissected in a droplet of PBS + 0.01% tween. Venom  
729 glands were either directly mounted on a glass slide for further examination  
730 under a light microscope or transferred into a solution of 2% glutaraldehyde  
731 in PBS for further examination under the Transmission Electron Microscope  
732 (TEM). For TEM, the tissues were then post fixed 1 hour in 2% osmium  
733 tetroxide in the same buffer, thoroughly rinsed in distilled water, stained "en  
734 bloc" with a 5% aqueous uranyl acetate solution, dehydrated in a series of  
735 graded ethanol and embedded in Epon's medium. Ultrathin sections were  
736 cut on a LKB ultratome and double stained in Uranyless and lead citrate.  
737 Samples were examined with a Jeol 1200 Ex transmission microscope at 80kV.  
738 Images were taken with an Quemesa 11 megapixel Olympus camera and  
739 analyzed with ImageJ software (<https://imagej.nih.gov/ij/>).



## 740 4.11 Proteomics

741 Proteins extracted from purified VLPs were using Laemmli buffer were  
742 stacked in the top of a SDS-PAGE gel (4-12% NuPAGE, Life Technologies),  
743 stained with Coomassie blue R-250 and in-gel digested using modified trypsin  
744 (Promega, sequencing grade) as previously described[70]. Resulting peptides  
745 were analyzed by online nanoliquid chromatography coupled to tandem  
746 mass spectrometry (UltiMate 3000 RSLC nano and Q-Exactive HF, Thermo  
747 Scientific). Peptides were sampled on a 300  $\mu\text{m}$  x 5 mm PepMap C18  
748 precolumn and separated on a 75  $\mu\text{m}$  x 250 mm C18 column (Reprosil-Pur  
749 120 C18-AQ, 1.9  $\mu\text{m}$ , Dr. Maisch) using a 120-min gradient. MS and MS/MS  
750 data were acquired using Xcalibur (Thermo Scientific). Peptides and proteins  
751 were identified using Mascot (version 2.6) through concomitant searches  
752 against the homemade *L. bouleardi* database (see 4.2 for details), classical  
753 contaminant database and the corresponding reversed databases. The Proline  
754 software (<http://proline.profiroteomics.fr>) was used to filter the results:  
755 conservation of rank 1 peptides, peptide identification false discovery rate <  
756 1% as calculated on peptide scores by employing the reverse database strategy  
757 and minimum of 1 specific peptide per identified protein group. Proline was  
758 then used to perform a compilation, grouping and spectral counting-based  
759 comparison of the protein groups identified in the different samples. Proteins  
760 from the contaminant database were discarded from the final list of identified  
761 proteins.

## 762 4.12 Annotation of viral genes

763 We searched for the presence of conserved domains in the 13 LbFV proteins  
764 horizontally transferred to *Leptopilina* species using the hmmer webserver  
765 (<https://www.ebi.ac.uk/Tools/hmmer/>) accessed the 5 of may 2018.

## 766 5 Acknowledgment

767 This work was supported by a grant from the Agence Nationale de la  
768 Recherche (ANR) to JV (11-JSV7-0011 Viromics). The bio-informatic work  
769 was performed using the computing facilities of the CC LBBE/PRABI. We  
770 thank the labex Ecofect for financial support for the internship of DDG.  
771 Proteomic experiments were partly supported by the Agence Nationale de  
772 la Recherche (ProFI grant ANR-10-INBSQ6). We thank Shubha Govind for  
773 kindly providing the *Ganaspis brasiliensis* strain, Elzemiek Geuverink for  
774 providing *L. clavipes* samples and Ken Kraaijeveld for providing access to  
775 raw Illumina reads of *L. clavipes*. We thank Dominique Colinet and Nathan

776 Mortimer for sharing mass-spec data and analysis. We thank B. Bennetot  
777 for helpful preliminary data generation, and D. Kahn for advices on data  
778 analysis. We thank PCI Evol Biol reviewers for helpful comments on an  
779 earlier draft which has been reviewed and recommended by Peer Community  
780 In Evolutionary Biology (<https://dx.doi.org/10.24072/pci.evolbiol.100062>).  
781 Scripts used for this publication are available at <https://doi.org/10.5281/zenodo.1889392>.

## 782 **6 Conflict of interest disclosure**

783 The authors of this preprint declare that they have no financial conflict of  
784 interest with the content of this article.

## 785 References

- 786 [1] Abd-Alla, A. M. M., Cousserans, F., Parker, A. G., Jehle, J. A., Parker,  
787 N. J., Vlak, J. M., Robinson, A. S., and Bergoin, M. Genome analysis  
788 of a *Glossina pallidipes* salivary gland hypertrophy virus reveals a novel,  
789 large, double-stranded circular DNA virus. *Journal of virology* 82(9)  
790 (2008), pp. 4595–4611.
- 791 [2] Abd-Alla, A. M. M., Vlak, J. M., Bergoin, M., Maruniak, J. E., Parker,  
792 A., Burand, J. P., Jehle, J. A., Boucias, D. G., and ICTV, H. S. G. of the  
793 Hytrosaviridae: a proposal for classification and nomenclature of a new  
794 insect virus family. *Archives of virology* 154(6) (2009), pp. 909–918.
- 795 [3] Béliveau, C., Cohen, A., Stewart, D., Periquet, G., Djoumad, A.,  
796 Kuhn, L., Stoltz, D., Boyle, B., Volkoff, A.-N., Herniou, E. A., Drezen,  
797 J.-M., and Cusson, M. Genomic and Proteomic Analyses Indicate  
798 that Banchine and Campoplegine Polydnviruses Have Similar, if Not  
799 Identical, Viral Ancestors. *Journal of virology* 89(17) (2015), pp. 8909–  
800 8921.
- 801 [4] Bezier, A., Annaheim, M., Herbinier, J., Wetterwald, C., Gyapay, G.,  
802 Bernard-Samain, S., Wincker, P., Roditi, I., Heller, M., Belghazi, M.,  
803 Pfister-Wilhem, R., Periquet, G., Dupuy, C., Huguet, E., Volkoff, A.-N.,  
804 Lanzrein, B., and Drezen, J.-M. Polydnviruses of Braconid Wasps  
805 Derive from an Ancestral Nudivirus. *Science* 323(5916) (2009), pp. 926–  
806 930.
- 807 [5] Bitra, K., Zhang, S., and Strand, M. R. Transcriptomic profiling of  
808 *Microplitis demolitor* bracovirus reveals host, tissue and stage-specific  
809 patterns of activity. *Journal of General Virology* 92(9) (2011), pp. 2060–  
810 2071.
- 811 [6] Bodenhofer, U., Bonatesta, E., Horejs-Kainrath, C., and Hochreiter, S.  
812 msa: an R package for multiple sequence alignment. *Bioinformatics*  
813 31(24) (2015), pp. 3997–3999.
- 814 [7] Bodenhofer, U., Bonatesta, E., Horejš-Kainrath, C., and Hochreiter, S.  
815 msa: an R package for multiple sequence alignment. *Bioinformatics*  
816 (*Oxford, England*) 22 (2015), btv494.
- 817 [8] Boto, L. Horizontal gene transfer in the acquisition of novel traits by  
818 metazoans. *Proceedings Of The Royal Society B-Biological Sciences*  
819 281(1777) (2014), p. 20132450.

- 820 [9] Buffington, M. L., Brady, S. G., and Morita, S. I. Divergence estimates  
821 and early evolutionary history of Figitidae (Hymenoptera: Cynipoidea).  
822 *Systematic Entomology* 37 (2012), pp. 287–304.
- 823 [10] Burke, G. R., Simmonds, T. J., Sharanowski, B. J., and Geib, S. M.  
824 Rapid Viral Symbiogenesis via Changes in Parasitoid Wasp Genome  
825 Architecture. *Molecular biology and evolution* 15(2) (2018), p. 137.
- 826 [11] Burke, G. R., Simmonds, T. J., Thomas, S. A., and Strand, M. R.  
827 Microplitis demolitor Bracovirus Proviral Loci and Clustered Replication  
828 Genes Exhibit Distinct DNA Amplification Patterns during Replication.  
829 *Journal of virology* 89(18) (2015), pp. 9511–9523.
- 830 [12] Castresana, J. Selection of conserved blocks from multiple alignments  
831 for their use in phylogenetic analysis. *Molecular biology and evolution*  
832 17(4) (2000), pp. 540–552.
- 833 [13] Cheng, R.-L., Xi, Y., Lou, Y.-H., Wang, Z., Xu, J.-Y., Xu, H.-J., and  
834 Zhang, C.-X. Brown planthopper nudivirus DNA integrated in its host  
835 genome. *Journal of virology* 88(10) (2014), pp. 5310–5318.
- 836 [14] Chevignon, G., Theze, J., Cambier, S., Poulain, J., Da Silva, C., Bézier,  
837 A., Musset, K., Moreau, S. J. M., Drezen, J.-M., and Huguet, E.  
838 Functional annotation of *Cotesia congregata* bracovirus: identification  
839 of viral genes expressed in parasitized host immune tissues. *Journal of*  
840 *virology* 88(16) (2014), pp. 8795–8812.
- 841 [15] Cobbs, C., Heath, J., Stireman, J. O., and Abbot, P. Carotenoids in  
842 unexpected places: gall midges, lateral gene transfer, and carotenoid  
843 biosynthesis in animals. *Molecular phylogenetics and evolution* 68(2)  
844 (2013), pp. 221–228.
- 845 [16] Colinet, D., Dubuffet, A., Cazes, D., Moreau, S., Drezen, J., and Poirié,  
846 M. A serpin from the parasitoid wasp *Leptopilina boulardi* targets  
847 the *Drosophila* phenoloxidase cascade. *Developmental and comparative*  
848 *immunology* (2008).
- 849 [17] Colinet, D., Cazes, D., Belghazi, M., Gatti, J.-L., and Poirié, M. Extracellular  
850 Superoxide Dismutase in Insects. *Journal of Biological Chemistry* 286(46)  
851 (2011), pp. 40110–40121. ISSN: 1083-351X.
- 852 [18] Colinet, D., Schmitz, A., Cazes, D., Gatti, J.-L., and Poirié, M. The  
853 origin of intraspecific variation of virulence in an eukaryotic immune  
854 suppressive parasite. *PLoS pathogens* 6(11) (2010), e1001206.
- 855 [19] Colinet, D., Schmitz, A., Depoix, D., Crochard, D., and Poirié, M.  
856 Convergent Use of RhoGAP Toxins by Eukaryotic Parasites and Bacterial  
857 Pathogens. *PLoS pathogens* 3(12) (2007), e203.

- 858 [20] Cornelis, G., Funk, M., Vernochet, C., Leal, F., Tarazona, O. A.,  
859 Meurice, G., Heidmann, O., Dupressoir, A., Miralles, A., Ramirez-  
860 Pinilla, M. P., and al., et. An endogenous retroviral envelope syncytin  
861 and its cognate receptor identified in the viviparous placental Mabuya  
862 lizard. *Proceedings of the National Academy of Sciences* 114(51) (2017),  
863 E10991–E11000. ISSN: 1091-6490.
- 864 [21] Danchin, E. G. J., Rosso, M.-N., Vieira, P., Almeida-Engler, J. de,  
865 Coutinho, P. M., Henrissat, B., and Abad, P. Multiple lateral gene  
866 transfers and duplications have promoted plant parasitism ability in  
867 nematodes. *Proceedings Of The National Academy Of Sciences Of The*  
868 *United States Of America* 107(41) (2010), pp. 17651–17656.
- 869 [22] David, J. R. A new medium for rearing *Drosophila* in axenic conditions.  
870 *Drosophila Info Service* 36 (1962), p. 128.
- 871 [23] Dong, F., Wang, J., Deng, R., and Wang, X. *Autographa californica*  
872 multiple nucleopolyhedrovirus gene ac81 is required for nucleocapsid  
873 envelopment. *Virus Research* 221 (2016), pp. 47–57.
- 874 [24] Dupas, S., Brehelin, M., Frey, F., and Carton, Y. Immune suppressive  
875 virus-like particles in a *Drosophila* parasitoid: significance of their  
876 intraspecific morphological variations. *Parasitology* 113(03) (1996),  
877 p. 207. ISSN: 1469-8161.
- 878 [25] Forbes, A. A., Bagley, R. K., Beer, M. A., Hippee, A. C., and Widmayer,  
879 H. A. Quantifying the unquantifiable: why Hymenoptera, not Coleoptera,  
880 is the most speciose animal order. *BMC Ecology* 18(1) (2018). ISSN:  
881 1472-6785.
- 882 [26] Gandon, S., Rivero, A., and Varaldi, J. Superparasitism evolution:  
883 Adaptation or manipulation? *The American naturalist* 167 (2006), E1–  
884 E22.
- 885 [27] Gauthier, J., Drezen, J.-M., and Herniou, E. A. The recurrent domestication  
886 of viruses: major evolutionary transitions in parasitic wasps. *Parasitology*  
887 (2017), pp. 1–13.
- 888 [28] Goecks, J., Mortimer, N. T., Mobley, J. A., Bowersock, G. J., Taylor,  
889 J., and Schlenke, T. A. Integrative Approach Reveals Composition of  
890 Endoparasitoid Wasp Venoms. *PLoS ONE* 8(5) (2013), e64125.
- 891 [29] Gokhman, V. E., Johnston, J. S., Small, C., Rajwani, R., Hanrahan,  
892 S. J., and Govind, S. Genomic and karyotypic variation in *Drosophila*  
893 parasitoids (Hymenoptera, Cynipoidea, Figitidae). *Comparative Cytogenetics*  
894 5(3) (2010), pp. 211–221.

- 895 [30] Goubert, C., Modolo, L., Vieira, C., ValienteMoro, C., Mavingui, P.,  
896 and Boulesteix, M. De novo assembly and annotation of the asian  
897 tiger mosquito (*Aedes albopictus*) repeatome with dnaPipeTE from raw  
898 genomic reads and comparative analysis with the yellow fever mosquito  
899 (*Aedes aegypti*). *Genome biology and evolution* 7(4) (2015), pp. 1192–  
900 1205.
- 901 [31] Grbić, M. *et al.* The genome of *Tetranychus urticae* reveals herbivorous  
902 pest adaptations. *Nature* 479(7374) (2011), pp. 487–492.
- 903 [32] Gueguen, G., Rajwani, R., Paddibhatla, I., Morales, J., and Govind,  
904 S. VLPs of *Leptopilina boulardi* share biogenesis and overall stellate  
905 morphology with VLPs of the heterotoma clade. *Virus Research* 160(1-2)  
906 (2011), pp. 7–7.
- 907 [33] Guindon, S., Dufayard, J.-F., Lefort, V., Anisimova, M., Hordijk, W.,  
908 and Gascuel, O. New Algorithms and Methods to Estimate Maximum-  
909 Likelihood Phylogenies: Assessing the Performance of PhyML 3.0.  
910 *Systematic Biology* 59(3) (2010), pp. 307–321.
- 911 [34] Guy, L., Roat Kultima, J., and Andersson, S. G. E. genoPlotR: comparative  
912 gene and genome visualization in R. *Bioinformatics (Oxford, England)*  
913 26(18) (2010), pp. 2334–2335.
- 914 [35] Heavner, M. E., Ramroop, J., Gueguen, G., Ramrattan, G., Dolios, G.,  
915 Scarpati, M., Kwiat, J., Bhattacharya, S., Wang, R., Singh, S., and  
916 Govind, S. Novel Organelles with Elements of Bacterial and Eukaryotic  
917 Secretion Systems Weaponize Parasites of *Drosophila*. *Current Biology*  
918 27(18) (2017), 2869–2877.e6.
- 919 [36] Herniou, E. A., Huguet, E., Theze, J., Bézier, A., Periquet, G., and  
920 Drezén, J.-M. When parasitic wasps hijacked viruses: genomic and  
921 functional evolution of polydnviruses. *Philosophical Transactions of*  
922 *the Royal Society B: Biological Sciences* 368(1626) (2013), p. 20130051.
- 923 [37] Hoff, K. J. and Stanke, M. WebAUGUSTUS—a web service for training  
924 AUGUSTUS and predicting genes in eukaryotes. *Nucleic acids research*  
925 41(Web Server issue) (2013), W123–8.
- 926 [38] Husnik, F. and McCutcheon, J. P. Functional horizontal gene transfer  
927 from bacteria to eukaryotes. *Nature reviews Microbiology* 16(2) (2017),  
928 pp. 67–79.
- 929 [39] Jiang, H., Lei, R., Ding, S.-W., and Zhu, S. Skewer - a fast and accurate  
930 adapter trimmer for next-generation sequencing paired-end reads. *BMC*  
931 *bioinformatics* 15 (2014), p. 182.



- 932 [40] Keeling, P. J. and Palmer, J. D. Horizontal gene transfer in eukaryotic  
933 evolution. *Nature Reviews Genetics* 9(8) (2008), pp. 605–618.
- 934 [41] Kraaijeveld, K., Anvar, Y., Frank, J., Schmitz, A., Bast, J., Wilbrandt,  
935 J., Petersen, M., Ziesmann, T., Niehuis, O., Knijff, P. d., Dunnen, J. T. d.,  
936 and Ellers, J. Decay of sexual trait genes in an asexual parasitoid wasp.  
937 *Genome biology and evolution* (2016), evw273.
- 938 [42] Labrosse, C., Carton, Y., Dubuffet, A., Drezen, J. M., and Poirié, M.  
939 Active suppression of *D. melanogaster* immune response by long gland  
940 products of the parasitic wasp *Leptopilina boulardi*. *Journal of insect*  
941 *physiology* 49(5) (2003), pp. 513–522.
- 942 [43] Labrosse, C., Eslin, P., Doury, G., Drezen, J. M., and Poirié, M.  
943 Haemocyte changes in *D. melanogaster* in response to long gland  
944 components of the parasitoid wasp *Leptopilina boulardi*: a Rho-GAP  
945 protein as an important factor. *Journal of insect physiology* 51(2) (2005),  
946 pp. 161–170.
- 947 [44] Langmead, B. and Salzberg, S. L. Fast gapped-read alignment with  
948 Bowtie 2. *Nature Methods* 9(4) (2012), pp. 357–359.
- 949 [45] Lavalie, C., Cornelis, G., Dupressoir, A., Esnault, C., Heidmann,  
950 O., Vernochet, C., and Heidmann, T. Paleovirology of “syncytins”,  
951 retroviral env genes exapted for a role in placentation. *Philosophical*  
952 *Transactions of the Royal Society B: Biological Sciences* 368(1626)  
953 (2013), pp. 20120507–20120507. ISSN: 1471-2970.
- 954 [46] Leclercq, S., Theze, J., Chebbi, M. A., Giraud, I., Moumen, B., Ernenwein,  
955 L., Grève, P., Gilbert, C., and Cordaux, R. Birth of a W sex chromosome  
956 by horizontal transfer of *Wolbachia* bacterial symbiont genome. *Proceedings*  
957 *of the National Academy of Sciences* 113(52) (2016), pp. 15036–15041.
- 958 [47] Leobold, M., Bézier, A., Pichon, A., Herniou, E. A., Volkoff, A.-N.,  
959 and Drezen, J.-M. The Domestication of a Large DNA Virus by the  
960 Wasp *Venturia canescens* Involves Targeted Genome Reduction through  
961 Pseudogenization. *Genome Biology and Evolution* 10(7) (2018). Ed. by  
962 Abergel, C., pp. 1745–1764. ISSN: 1759-6653.
- 963 [48] Lepetit, D., Gillet, B., Hughes, S., Kraaijeveld, K., and Varaldi, J.  
964 Genome sequencing of the behavior Manipulating virus LbFV reveals a  
965 possible new virus family. *Genome biology and evolution* 8(12) (2016),  
966 pp. 3718–3739.

- 967 [49] Li, H., Handsaker, B., Wysoker, A., Fennell, T., Ruan, J., Homer,  
968 N., Marth, G., Abecasis, G., Durbin, R., and 1000 Genome Project  
969 Data Processing Subgroup. The Sequence Alignment/Map format and  
970 SAMtools. *Bioinformatics (Oxford, England)* 25(16) (2009), pp. 2078–  
971 2079.
- 972 [50] Louis, F., Bézier, A., Periquet, G., Ferras, C., Drezen, J.-M., and Dupuy,  
973 C. The bracovirus genome of the parasitoid wasp *Cotesia congregata* is  
974 amplified within 13 replication units, including sequences not packaged  
975 in the particles. *Journal of virology* 87(17) (2013), pp. 9649–9660.
- 976 [51] Malmstrøm, M., Matschiner, M., Tørresen, O. K., Jakobsen, K. S., and  
977 Jentoft, S. Whole genome sequencing data and de novo draft assemblies  
978 for 66 teleost species. *Scientific Data* 4 (2017), p. 160132. ISSN: 2052-  
979 4463.
- 980 [52] Marçais, G. and Kingsford, C. A fast, lock-free approach for efficient  
981 parallel counting of occurrences of k-mers. *Bioinformatics (Oxford,  
982 England)* 27(6) (2011), pp. 764–770.
- 983 [53] Martinez, J., Fleury, F., and Varaldi, J. Heritable variation in an  
984 extended phenotype: the case of a parasitoid manipulated by a virus.  
985 *Journal of Evolutionary Biology* 25(1) (2012), pp. 54–65.
- 986 [54] Martinez, J., Fleury, F., and Varaldi, J. Competitive outcome of multiple  
987 infections in a behavior-manipulating virus/wasp interaction. *Ecology  
988 and Evolution* 5(24) (2015), pp. 5934–45.
- 989 [55] Menzel, P., Ng, K. L., and Krogh, A. Fast and sensitive taxonomic  
990 classification for metagenomics with Kaiju. *Nature Communications* 7  
991 (2016), pp. 1–9.
- 992 [56] Misof, B. *et al.* Phylogenomics resolves the timing and pattern of insect  
993 evolution. *Science (New York, NY)* 346(6210) (2014), pp. 763–767.
- 994 [57] Morales, J., Chiu, H., Oo, T., Plaza, R., Hoskins, S., and Govind,  
995 S. Biogenesis, structure, and immune-suppressive effects of virus-like  
996 particles of a *Drosophila* parasitoid, *Leptopilina victoriae*. *Journal of  
997 insect physiology* 51(2) (2005), pp. 181–195.
- 998 [58] Moran, N. and Jarvik, T. Lateral Transfer of Genes from Fungi Underlies  
999 Carotenoid Production in Aphids. *Science (New York, NY)* 328(5978)  
1000 (2010), pp. 624–627.
- 1001 [59] Mouton, L., Henri, H., Boulétreau, M., and Vavre, F. Strain-specific  
1002 regulation of intracellular *Wolbachia* density in multiply infected insects.  
1003 *Molecular Ecology* 12(12) (2003), pp. 3459–3465.

- 1004 [60] Murphy, N., Banks, J. C., Whitfield, J. B., and Austin, A. D. Phylogeny  
1005 of the parasitic microgastroid subfamilies (Hymenoptera: Braconidae)  
1006 based on sequence data from seven genes, with an improved time  
1007 estimate of the origin of the lineage. *Molecular phylogenetics and*  
1008 *evolution* 47(1) (2008), pp. 378–395.
- 1009 [61] Oers, M. M. van and Vlak, J. M. Baculovirus genomics. *Current Drug*  
1010 *Targets* 8(10) (2007), pp. 1051–1068.
- 1011 [62] Patot, S., Allemand, R., Fleury, F., and Varaldi, J. An inherited  
1012 virus influences the coexistence of parasitoid species through behaviour  
1013 manipulation. *Ecology Letters* 15(6) (2012), pp. 603–610.
- 1014 [63] Peng, Y., Leung, H. C. M., Yiu, S. M., and Chin, F. Y. L. IDBA-UD: a  
1015 de novo assembler for single-cell and metagenomic sequencing data with  
1016 highly uneven depth. *Bioinformatics (Oxford, England)* 28(11) (2012),  
1017 pp. 1420–1428.
- 1018 [64] Peters, R. S. *et al.* Evolutionary History of the Hymenoptera. *Current*  
1019 *biology : CB* (2017), pp. 1–7.
- 1020 [65] Pichon, A. *et al.* Recurrent DNA virus domestication leading to different  
1021 parasite virulence strategies. *Science Advances* 1(10) (2015), e1501150–  
1022 e1501150.
- 1023 [66] Poirié, M., Colinet, D., and Gatti, J.-L. Insights into function and  
1024 evolution of parasitoid wasp venoms. *Current Opinion in Insect Science*  
1025 6 (2014), pp. 52–60.
- 1026 [67] Reineke, A., Asgari, S., and Schmidt, O. Evolutionary origin of *Venturia*  
1027 *canescens* virus-like particles. *Archives of insect biochemistry and physiology*  
1028 61(3) (2006), pp. 123–133.
- 1029 [68] Rizki, R. M. and Rizki, T. M. Parasitoid virus-like particles destroy  
1030 *Drosophila* cellular immunity. *Proceedings Of The National Academy*  
1031 *Of Sciences Of The United States Of America* 87(21) (1990), pp. 8388–  
1032 8392.
- 1033 [69] Saeedi, R., Li, M., and Frohlich, J. Clinical Biochemistry. *Clinical*  
1034 *Biochemistry* 48(7-8) (2015), pp. 472–475.
- 1035 [70] Salvetti, A., Couté, Y., Epstein, A., Arata, L., Kraut, A., Navratil,  
1036 V., Bouvet, P., and Greco, A. Nuclear Functions of Nucleolin through  
1037 Global Proteomics and Interactomic Approaches. *Journal of Proteome*  
1038 *Research* 15(5) (2016), pp. 1659–1669. ISSN: 1535-3907.

- 1039 [71] Simão, F. A., Waterhouse, R. M., Ioannidis, P., Kriventseva, E. V.,  
1040 and Zdobnov, E. M. BUSCO: assessing genome assembly and annotation  
1041 completeness with single-copy orthologs. *Bioinformatics (Oxford, England)*  
1042 31(19) (2015), pp. 3210–3212.
- 1043 [72] Sun, H., Ding, J., Piednoël, M., and Schneeberger, K. findGSE: estimating  
1044 genome size variation within human and *Arabidopsis* using k-mer  
1045 frequencies. *Bioinformatics (Oxford, England)* 34(4) (2018), pp. 550–  
1046 557.
- 1047 [73] Theze, J., Bézier, A., Periquet, G., Drezen, J.-M., and Herniou, E. A.  
1048 Paleozoic origin of insect large dsDNA viruses. *PNAS* 108(38) (2011),  
1049 pp. 15931–15935.
- 1050 [74] Tzeng, Y. H. Comparison of Three Methods for Estimating Rates of  
1051 Synonymous and Nonsynonymous Nucleotide Substitutions. *Molecular*  
1052 *biology and evolution* 21(12) (2004), pp. 2290–2298.
- 1053 [75] Varaldi, J., Fouillet, P., Ravallec, M., Lopez-Ferber, M., Boulétreau, M.,  
1054 and Fleury, F. Infectious Behavior in a Parasitoid. *Science (New York,*  
1055 *NY)* 302(5652) (2003), pp. 1930–1930.
- 1056 [76] Varaldi, J. and Lepetit, D. Deciphering the behaviour manipulation  
1057 imposed by a virus on its parasitoid host: insights from a dual transcriptomic  
1058 approach. *Parasitology* 3 (2018), pp. 1–11.
- 1059 [77] Varaldi, J., Ravallec, M., Labrosse, C., Lopez-Ferber, M., Boulétreau,  
1060 M., and Fleury, F. Artificial transfer and morphological description of  
1061 virus particles associated with superparasitism behaviour in a parasitoid  
1062 wasp. *Journal of insect physiology* 52(11-12) (2006), pp. 1202–1212.
- 1063 [78] Volkoff, A.-N., Jouan, V., Urbach, S., Samain, S., Bergoin, M., Wincker,  
1064 P., Demette, E., Cousserans, F., Provost, B., Coulibaly, F., Legeai, F.,  
1065 Béliveau, C., Cusson, M., Gyapay, G., and Drezen, J.-M. Analysis of  
1066 virion structural components reveals vestiges of the ancestral ichnovirus  
1067 genome. *PLoS pathogens* 6(5) (2010), e1000923.
- 1068 [79] Wybouw, N., Pauchet, Y., Heckel, D. G., and Van Leeuwen, T. Horizontal  
1069 gene transfer contributes to the evolution of arthropod herbivory.  
1070 *Genome biology and evolution* 8(6) (2016), pp. 1785–1801.
- 1071 [80] Xu, H., Luo, X., Qian, J., Pang, X., Song, J., Qian, G., Chen, J., and  
1072 Chen, S. FastUniq: A Fast De Novo Duplicates Removal Tool for Paired  
1073 Short Reads. *PLoS ONE* 7(12) (2012), e52249.
- 1074 [81] Xue, W., Li, J.-T., Zhu, Y.-P., Hou, G.-Y., Kong, X.-F., Kuang, Y.-Y.,  
1075 and Sun, X.-W. L\_RNA\_scaffolder: scaffolding genomes with transcripts.  
1076 *BMC Genomics* 14(1) (2013), pp. 1–1.

- 1077 [82] Zhang, G., Schmidt, O., and Asgari, S. A calreticulin-like protein from  
1078 endoparasitoid venom fluid is involved in host hemocyte inactivation.  
1079 *Developmental Comparative Immunology* 30(9) (2006), pp. 756–764.  
1080 ISSN: 0145-305X.
